# Supplementary material for: Diversity analysis of 80,000 wheat accessions reveals consequences and opportunities of selection footprints
Source: PubMed Central journal article supplement (PMC7486412; doi:10.1038/s41467-020-18404-w), 2020-09-11
Supplement: 41467_2020_18404_MOESM1_ESM.pdf [file 41467_2020_18404_MOESM1_ESM.pdf]

**Diversity analysis of 80,000 wheat accessions reveals consequences and opportunities of selection footprints**

Sansaloni *et al.*

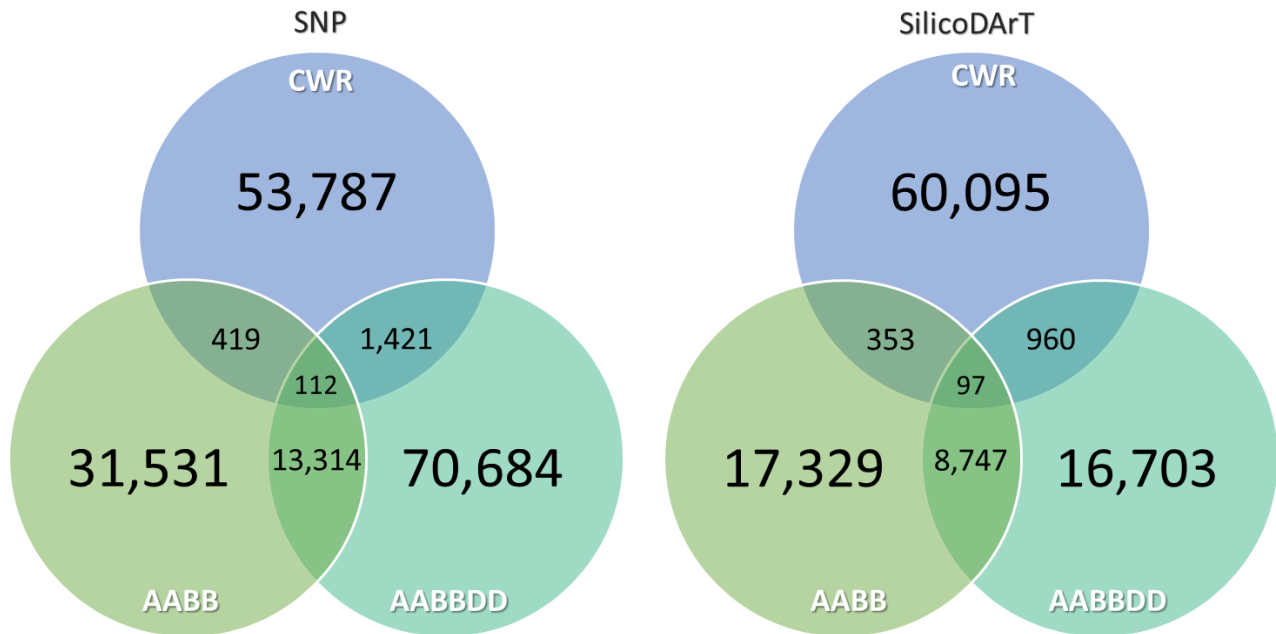

**Supplementary Figure 1. Number of SNP and SilicoDArT marker.**

Distribution of markers that passed quality filters across the three groups, CWR (2X, 4X and 6X), domesticated tetraploids (AABB) and domesticated hexaploids (AABBDD). The number of common SNP and SilicoDArT markers across data sets is very low between CWR with tetraploid and hexaploid, but higher between tetraploid and hexaploid.

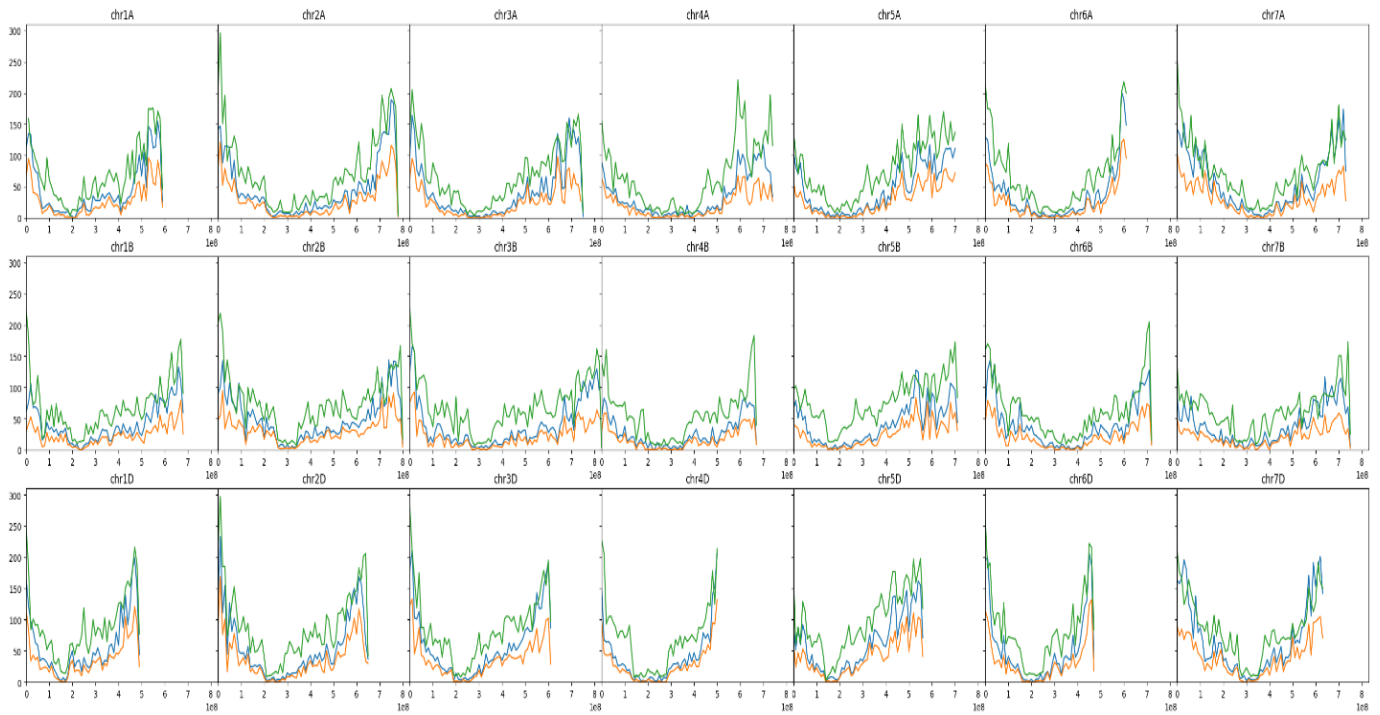

**Supplementary Figure 2. Distribution of SNP marker density in hexaploids.**

Distribution of 85,531 markers on 21 bread wheat chromosomes divided in 10MB window of the IWGSC RefSeq assembly v1.0. In green can be observed the number of genes; in blue the number of DArTseq markers and in orange the number of markers that overlap one transcript.

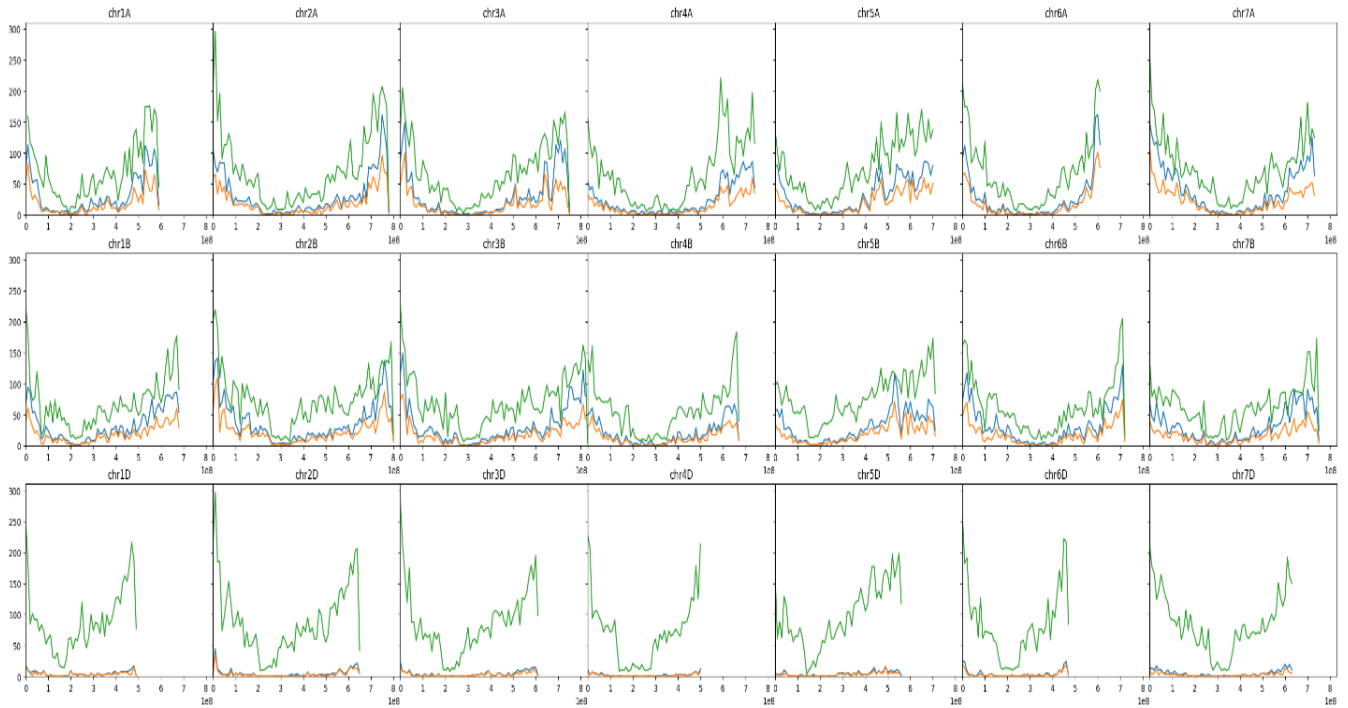

**Supplementary Figure 3. Distribution of SNP marker density in tetraploids.**

Distribution of 45,376 markers on 21 bread wheat chromosomes divided in 10MB window of the IWGSC RefSeq assembly v1.0. In green can be observed the number of genes; in blue the number of DARTseq markers and in orange the number of markers that overlap one transcript.



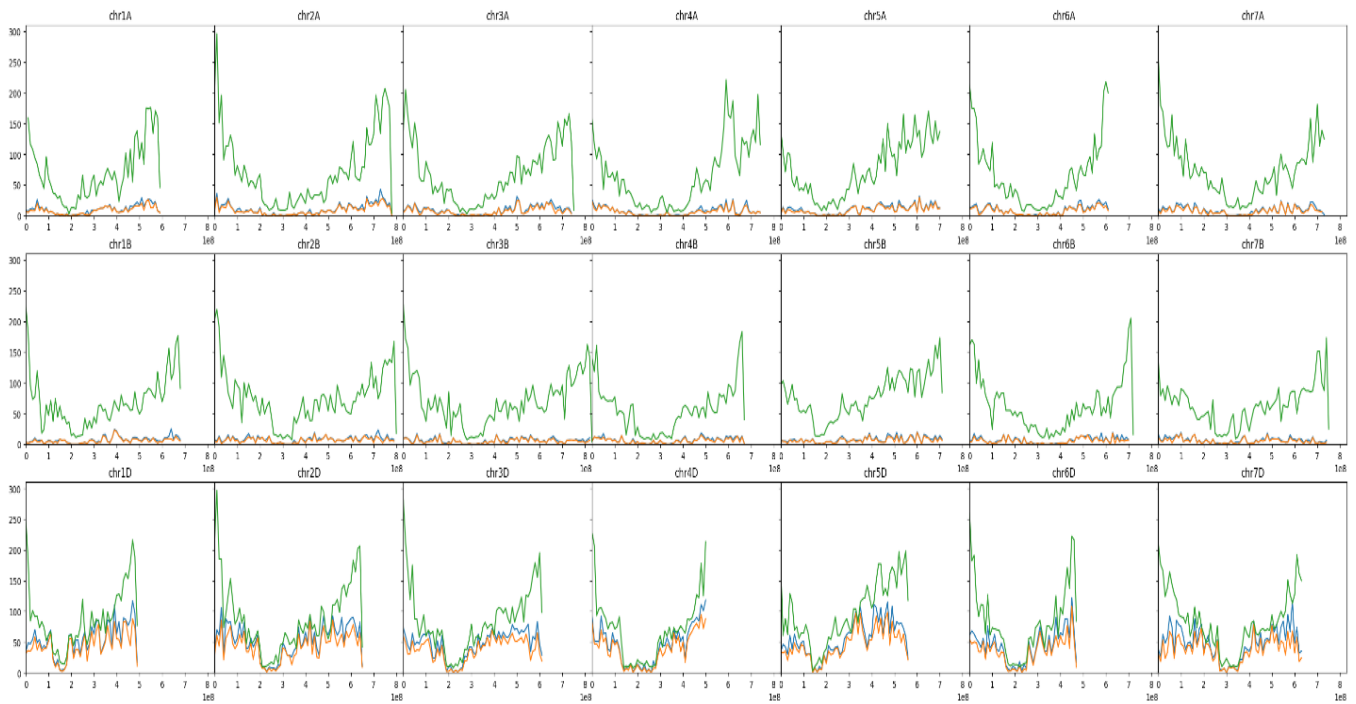

**Supplementary Figure 4. Distribution of SNP marker density in CWR.**

Distribution of 55,739 markers on 21 bread wheat chromosomes divided in 10MB window of the IWGSC RefSeq assembly v1.0. In green can be observed the number of genes; in blue the number of DArTseq markers and in orange the number of markers that overlap one transcript.

a

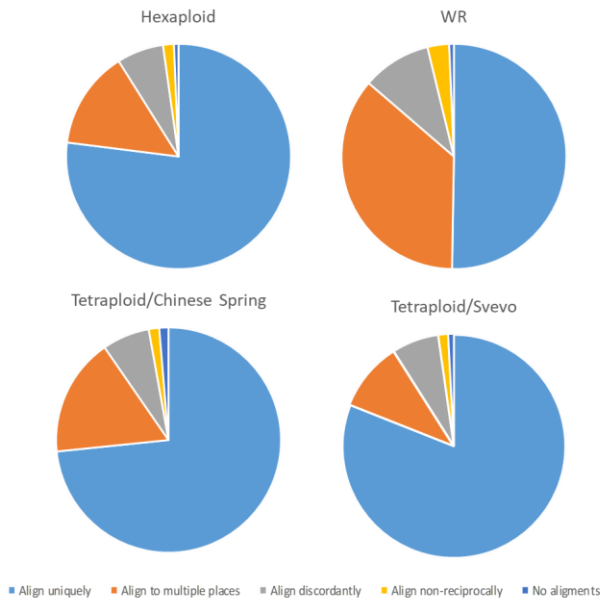

b

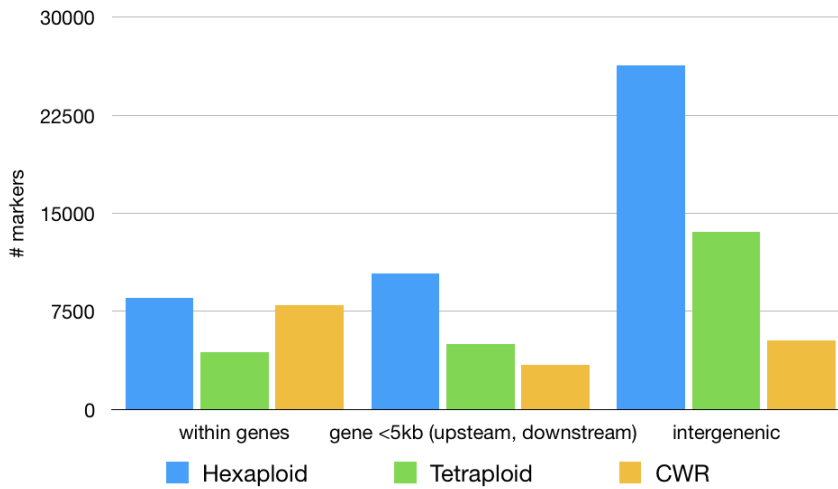

**Supplementary Figure 5. Distribution of reciprocal markers alignment on genome references.**

a) The markers were distributed in five categories of alignment: align uniquely (the markers mapped only in one location of the genome), mapped to multiple places (the markers mapped two or more location of the genome), mapped discordantly (each allele of the marker aligned to different locations of the genome), mapped non-reciprocally and no alignments. The most representatives are the markers aligned uniquely which represent 66,607 markers (77%) for the hexaploids, 30,806 markers (67.9%) and 31,181 markers (68.7%) for the tetraploids with the RefSeq v1.0 and Svevo genome respectively and 28,054 markers (50.3%) for the CWR. b) Distribution of markers mapping within genes, at <5kb (upstream, downstream) and in intergenic region fr the hexaploidy, tetraploid and CWR groups.

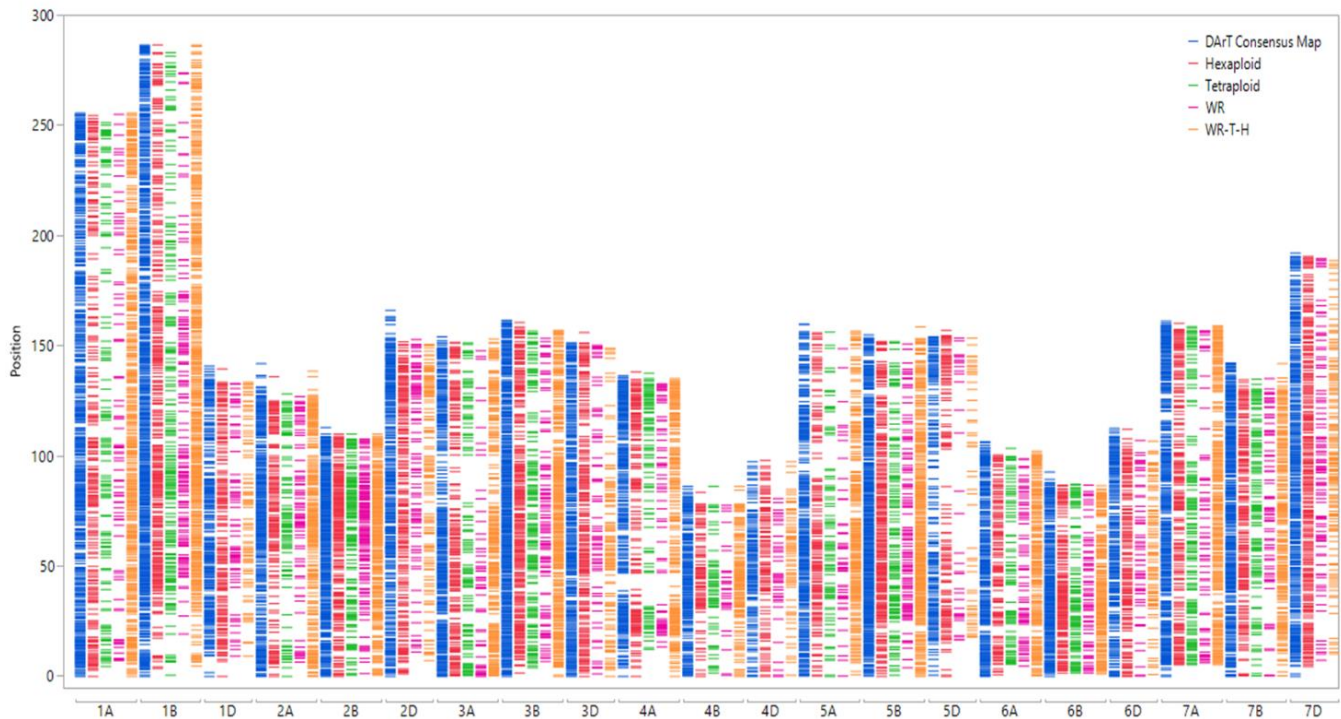

**Supplementary Figure 6. Distribution of DArTseq markers on the DArT consensus map.**

In blue we present the DArT genetic map (v4) including 105,122 markers distributed across the 21 chromosomes with an average of 5,006 markers per chromosome. We mapped a total of 44,501, 24,185 and 18,738 SNP markers representing 52.03%, 53.29% and 33.61% of the total numbers of SNP markers of the hexaploid (red), tetraploid (green) and wild relative (WR; pink) data sets respectively. Common markers shared among more than one of the three groups are shown in orange.

a

Landraces &amp; Elite

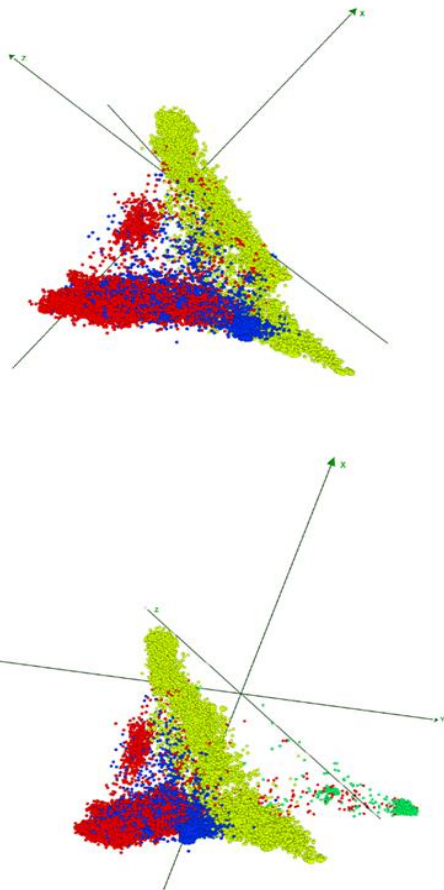

■ Landraces between 0.24 – 0.259 distance to Elite  
 ■ Landraces between 0.26 – 0.279 distance to Elite  
 ■ Landraces >0.28 (outliers)  
 ■ Elite

b

Landraces &amp; Synthetics

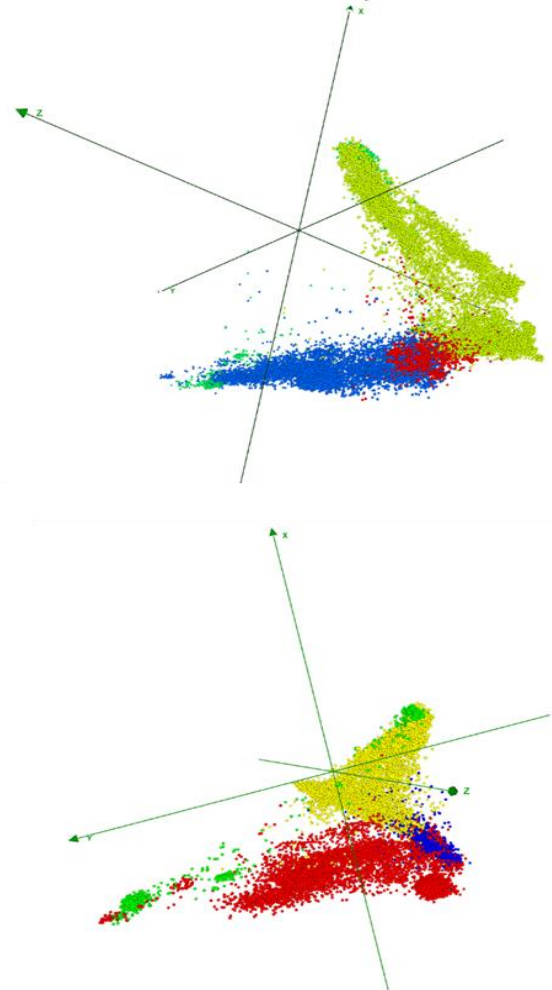

■ Landraces between 0.24 – 0.259 distance to Synthetics  
 ■ Landraces between 0.26 – 0.279 distance to Synthetics  
 ■ Landraces >0.28 (outliers)  
 ■ Synthetics

### Supplementary Figure 7. MRD between landraces and Elites/Synthetics in hexaploid.

a) The Modified Roger Distance (MRD) between each of the 22,698 landraces and the allelic frequencies for the group of 11,792 breeding elite lines shows three distinct groups, 4,742 landraces (20.9%) genetically very close to breeding elite lines with a genetic distance between 0.240 and less than 0.260, 17,311 landraces (76.3%) between 0.260 and less than 0.280 and 645 (2.84%) more than 0.28 which represent the outliers identified as tetraploid. b) Similar analysis comparing landraces with the group of synthetic accessions revealed 1,621 landraces (7.14%) genetically very close to synthetics with MRD between 0.240 and less than 0.260, 19,284 landraces (84.95%) with MRD between 0.260 less than 0.280, and 3) 1,793 (7.90%) with MRD greater than 0.280. In both cases, it can be observed two angles of the same image.

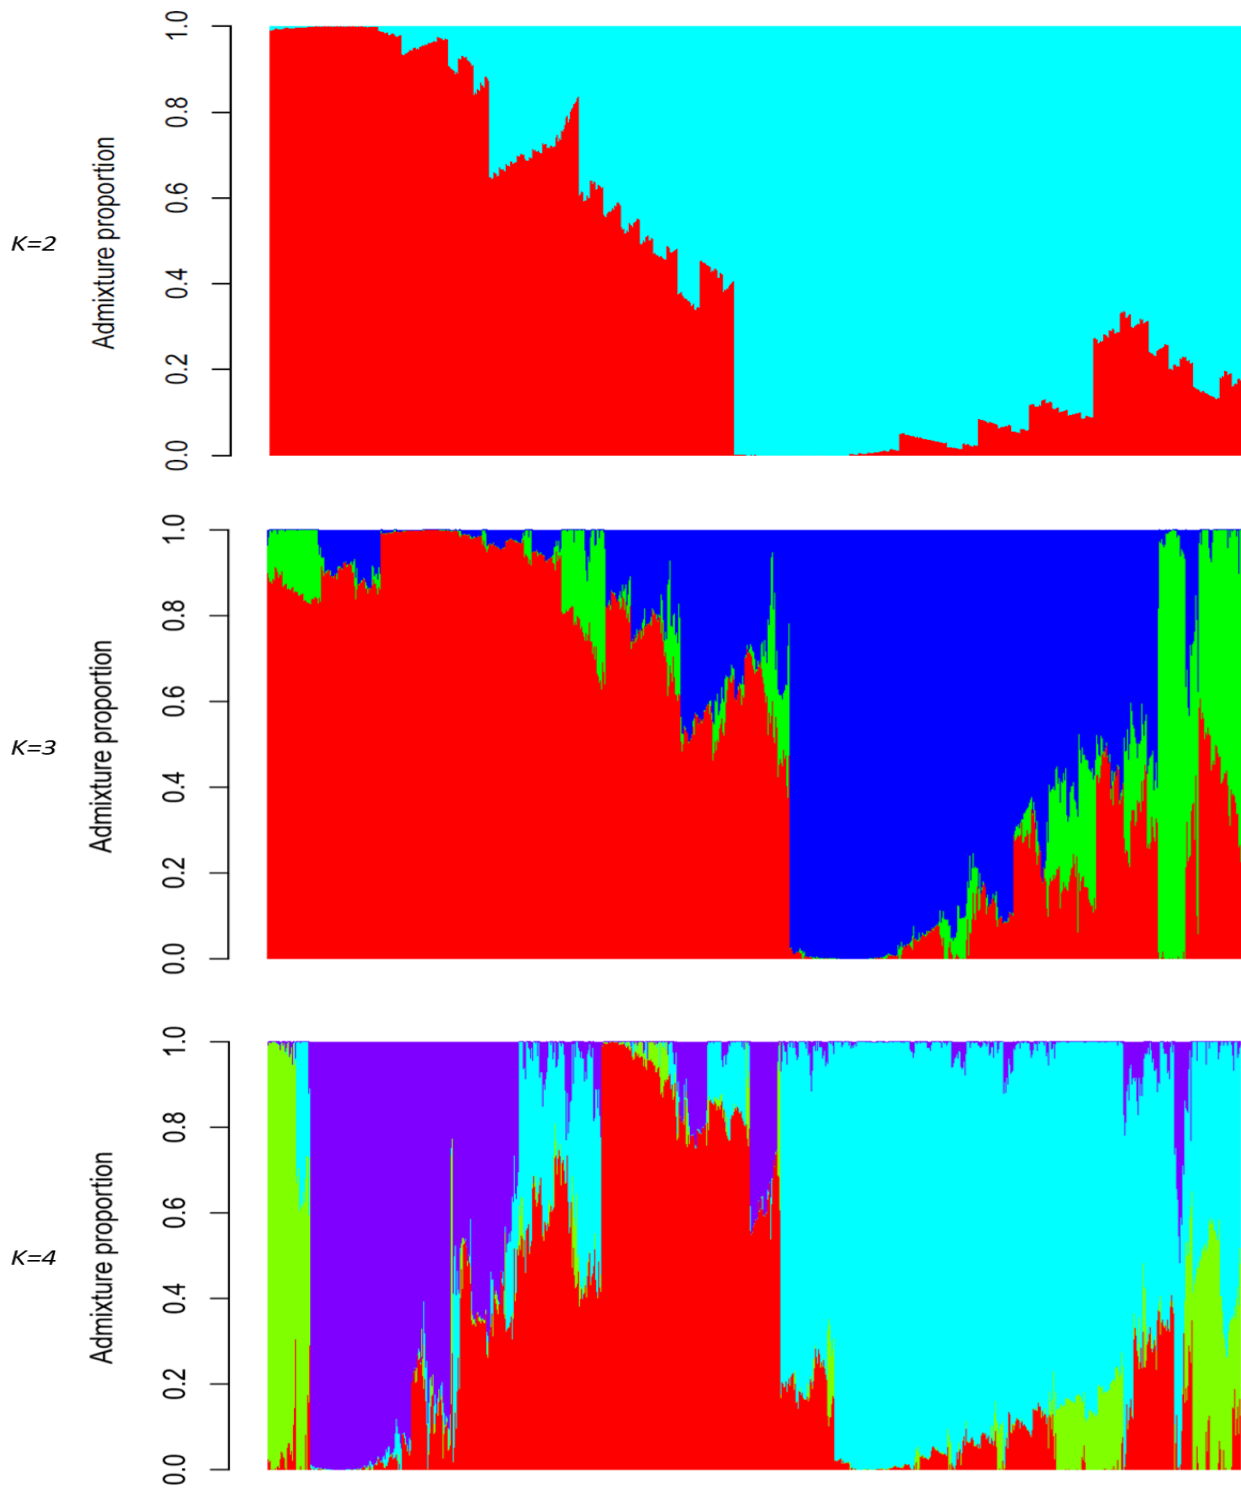

**Supplementary Figure 8. ADMIXTURE analysis in hexaploid.**

ADMIXTURE ancestry coefficients of a subset of 45,000 hexaploid samples in  $K=2$ ,  $K=3$  and  $k=4$ .

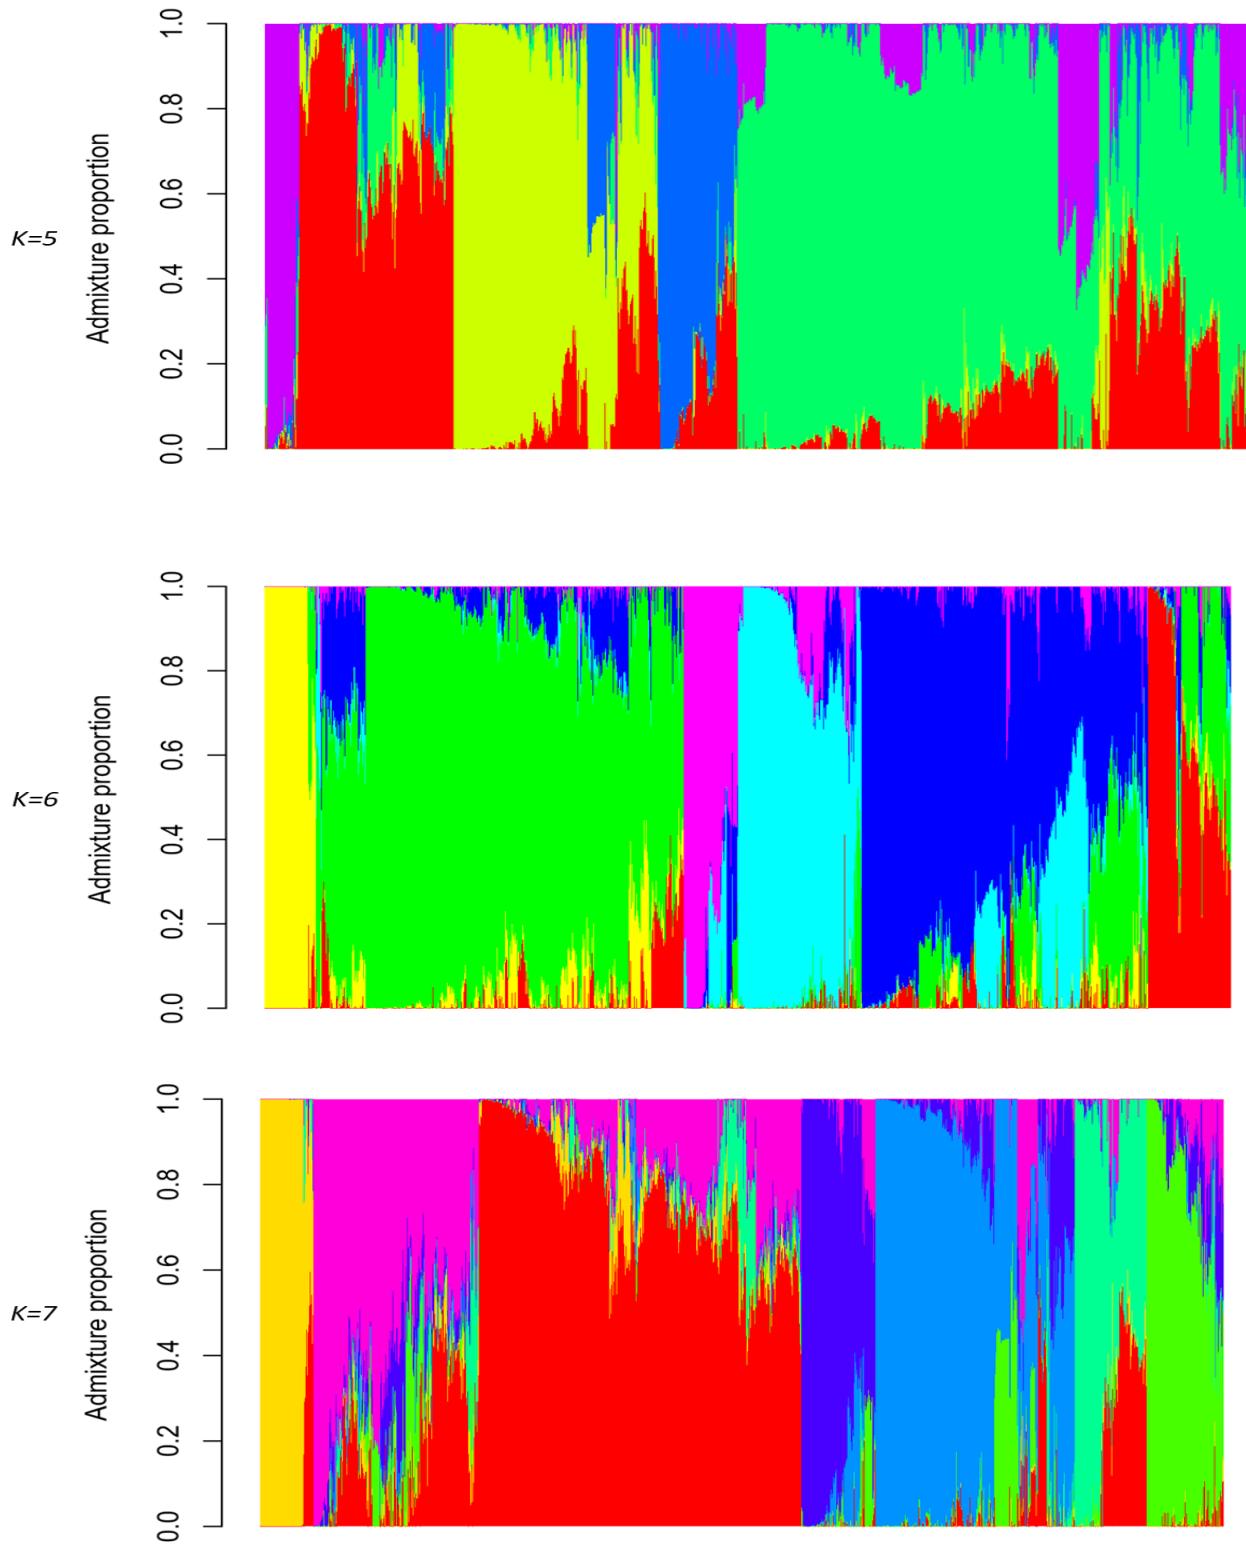

**Supplementary Figure 9. ADMIXTURE analysis in hexaploid.**

ADMIXTURE ancestry coefficients of a subset of 45,000 hexaploid samples in K=5, K=6 and k=7.

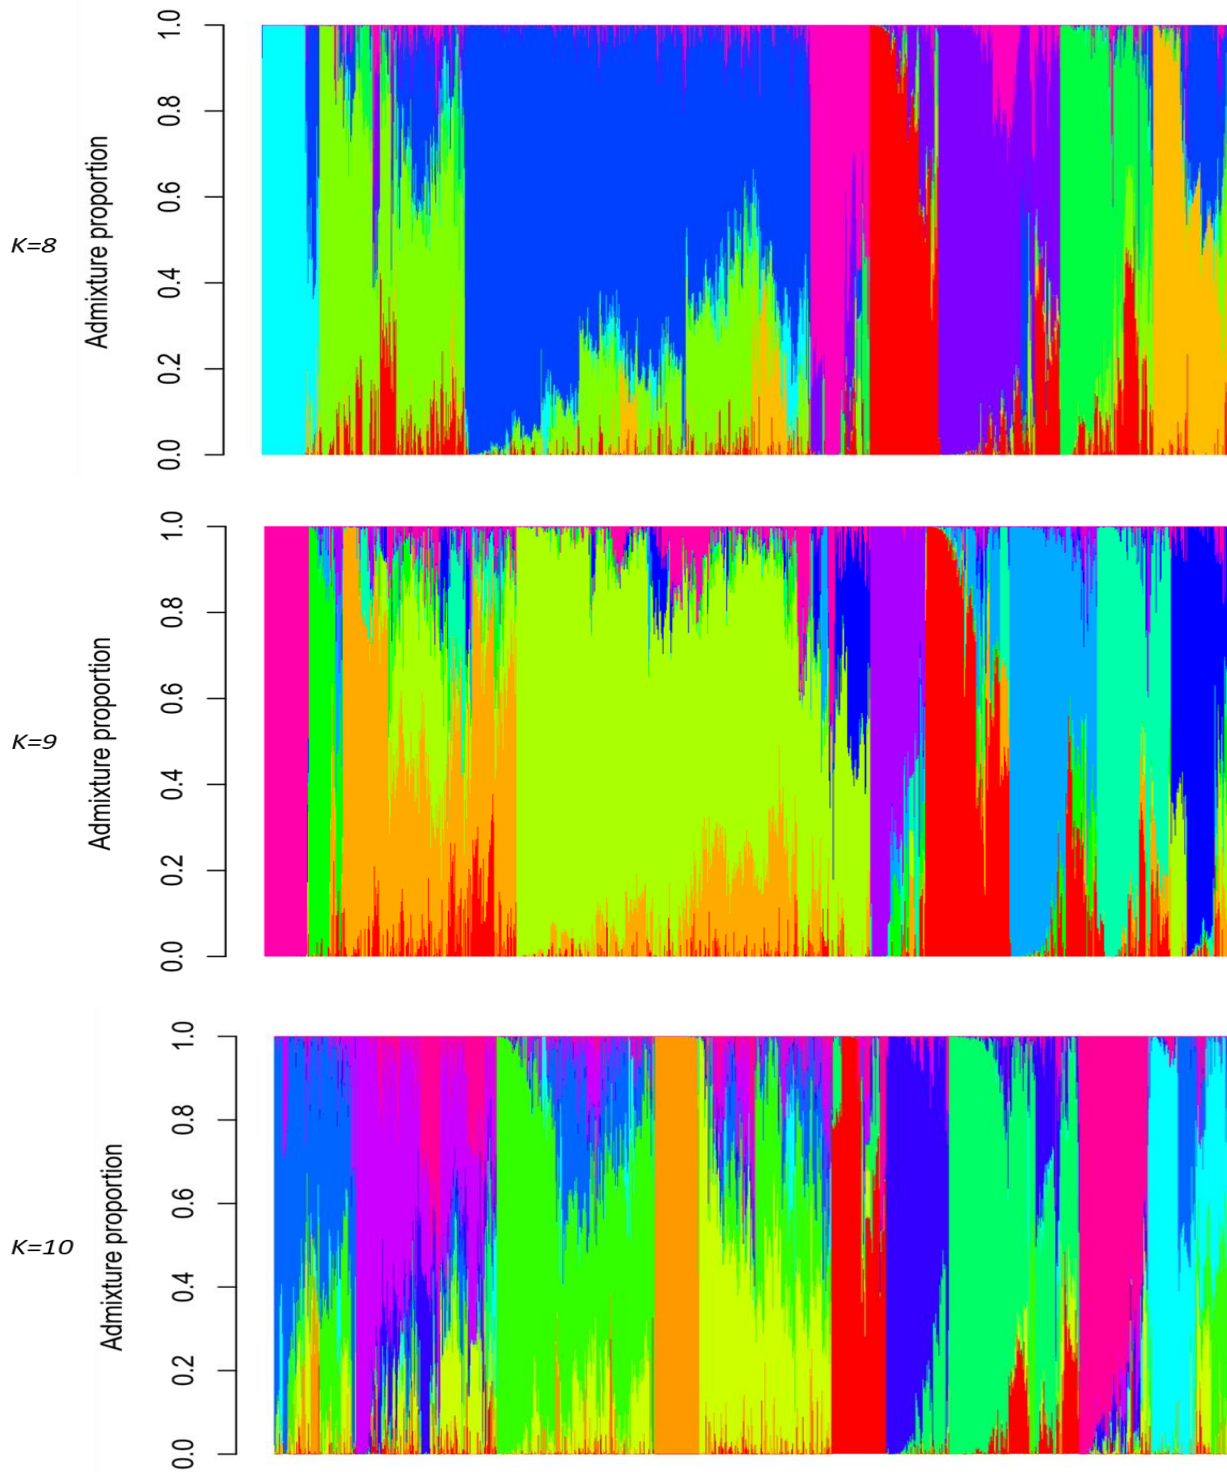

**Supplementary Figure 10. ADMIXTURE analysis in hexaploid.**

ADMIXTURE ancestry coefficients of a subset of 45,000 hexaploid samples in K=8, K=9 and k=10.



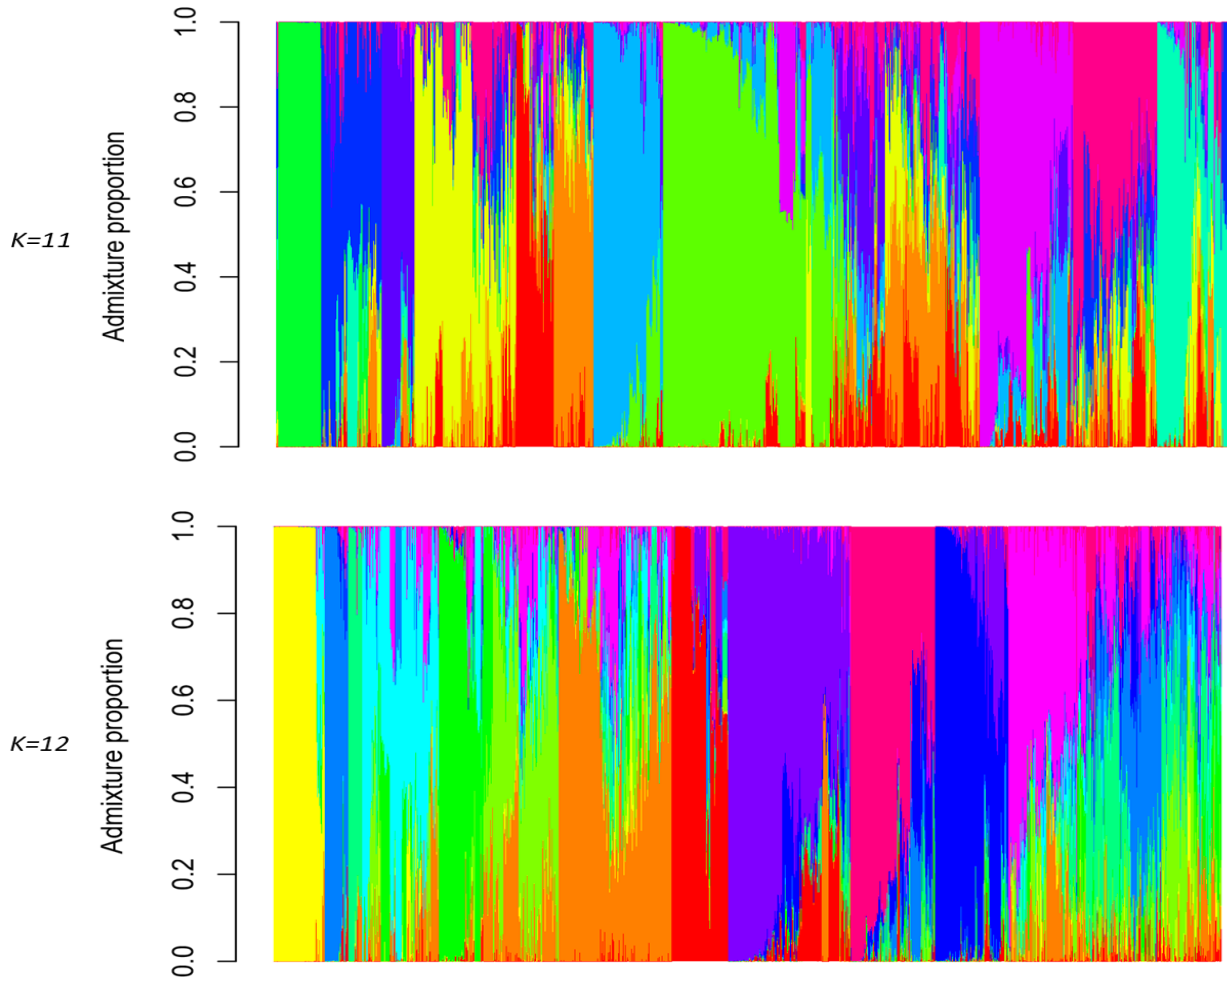

**Supplementary Figure 11. ADMIXTURE analysis in hexaploid.**

ADMIXTURE ancestry coefficients of a subset of 45,000 hexaploid samples in  $K=11$  and  $k=12$ .



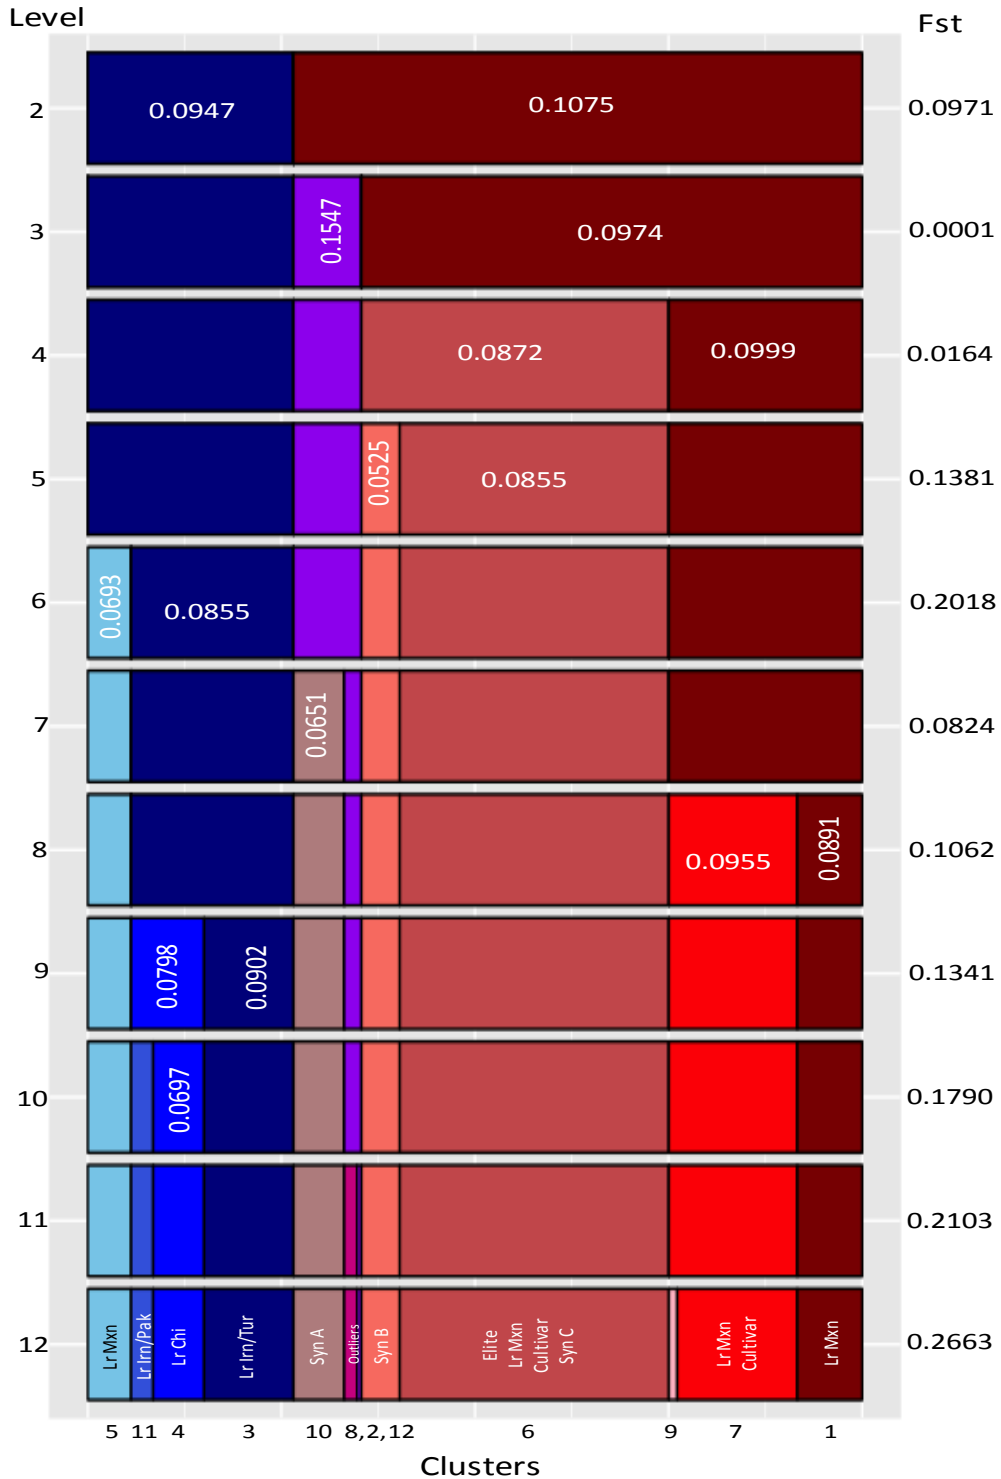

**Supplementary Figure 12. Representation of 12 groups based on clusters analysis.**

The size of the boxes is proportional to the number of accessions. In the right side are the Fixation index (Fst) values and inside the boxes the expected heterozygosity (He) of each group division and in the bottom the 12 clusters are identified with a brief description and the number which corresponds to figure 1B. Left numbers are the number of levels.

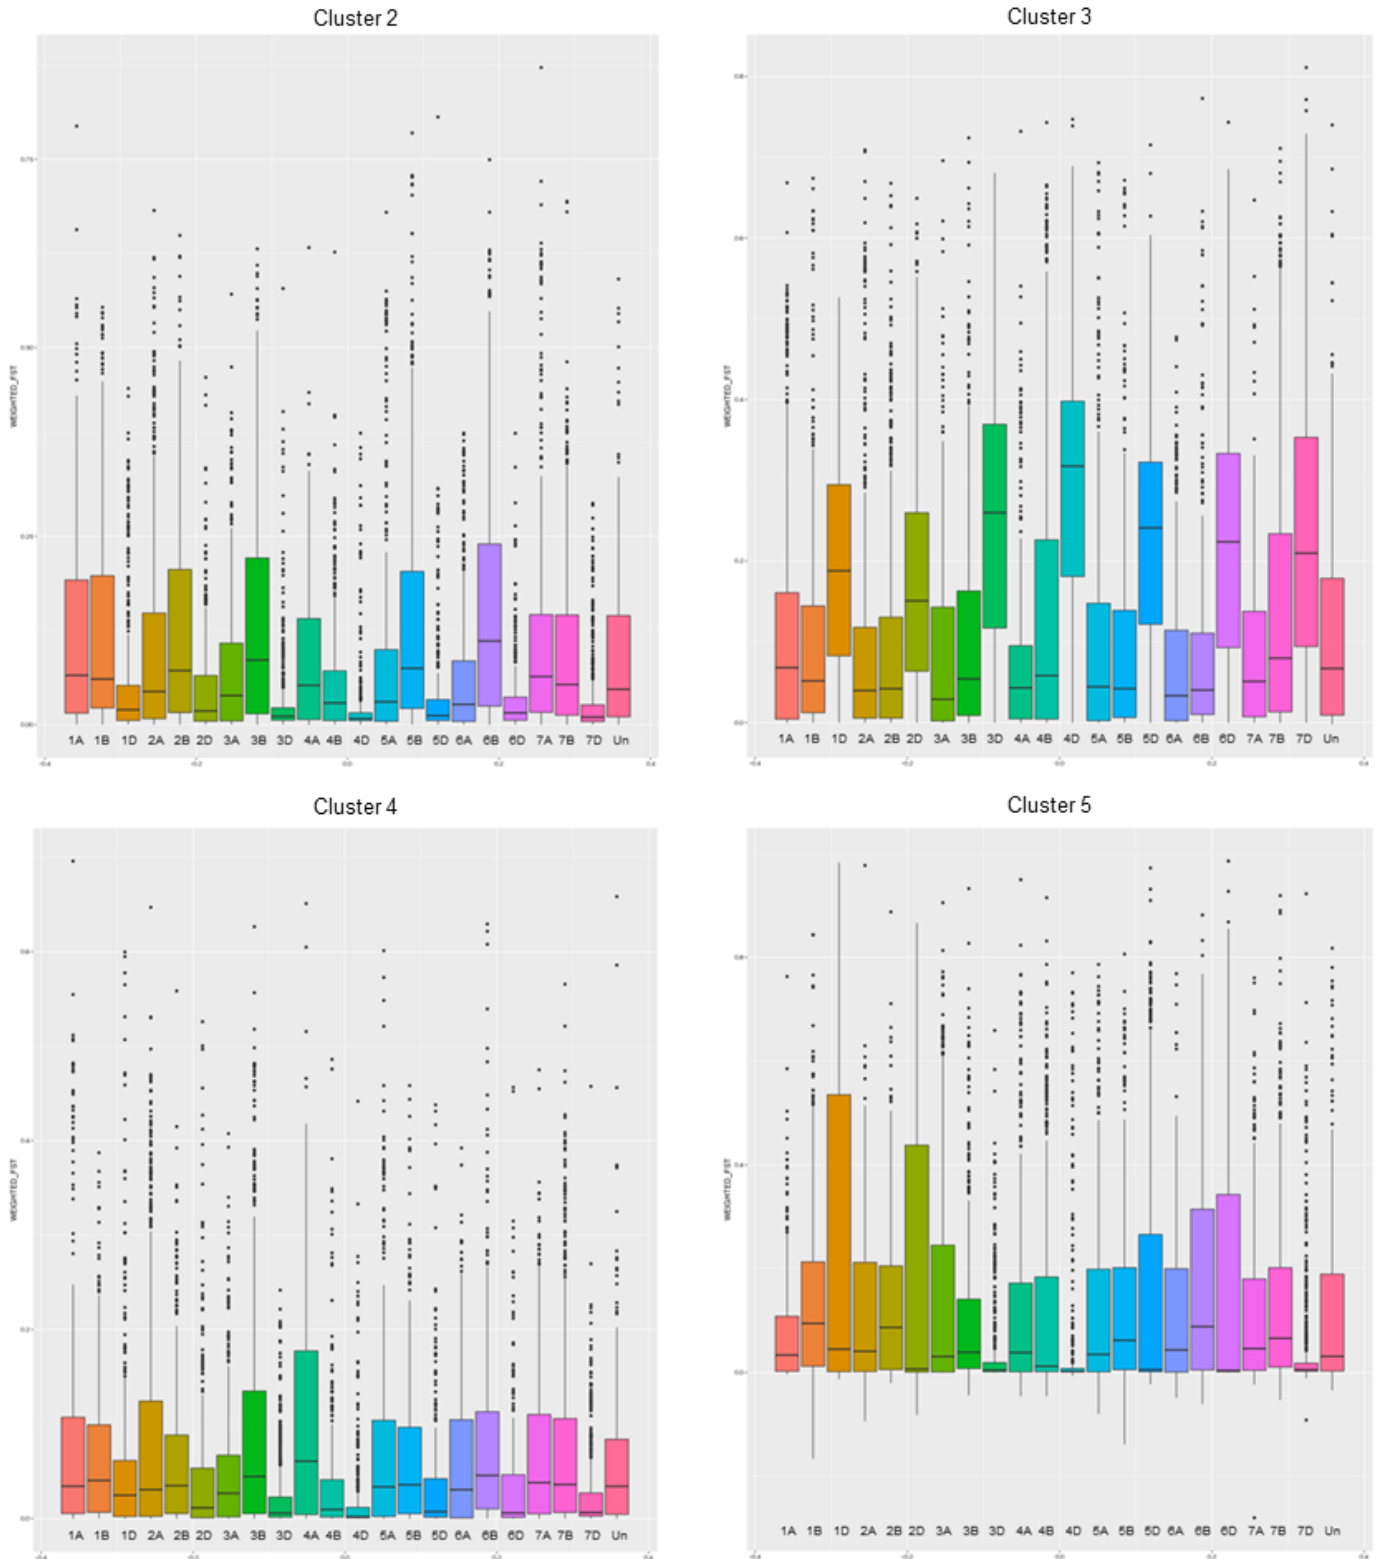

**Supplementary Figure 13. Fst analysis per chromosome in hexaploid group.**

Fst distributions across all chromosomes in the hexaploid group on cluster division 2, 3, 4 and 5.

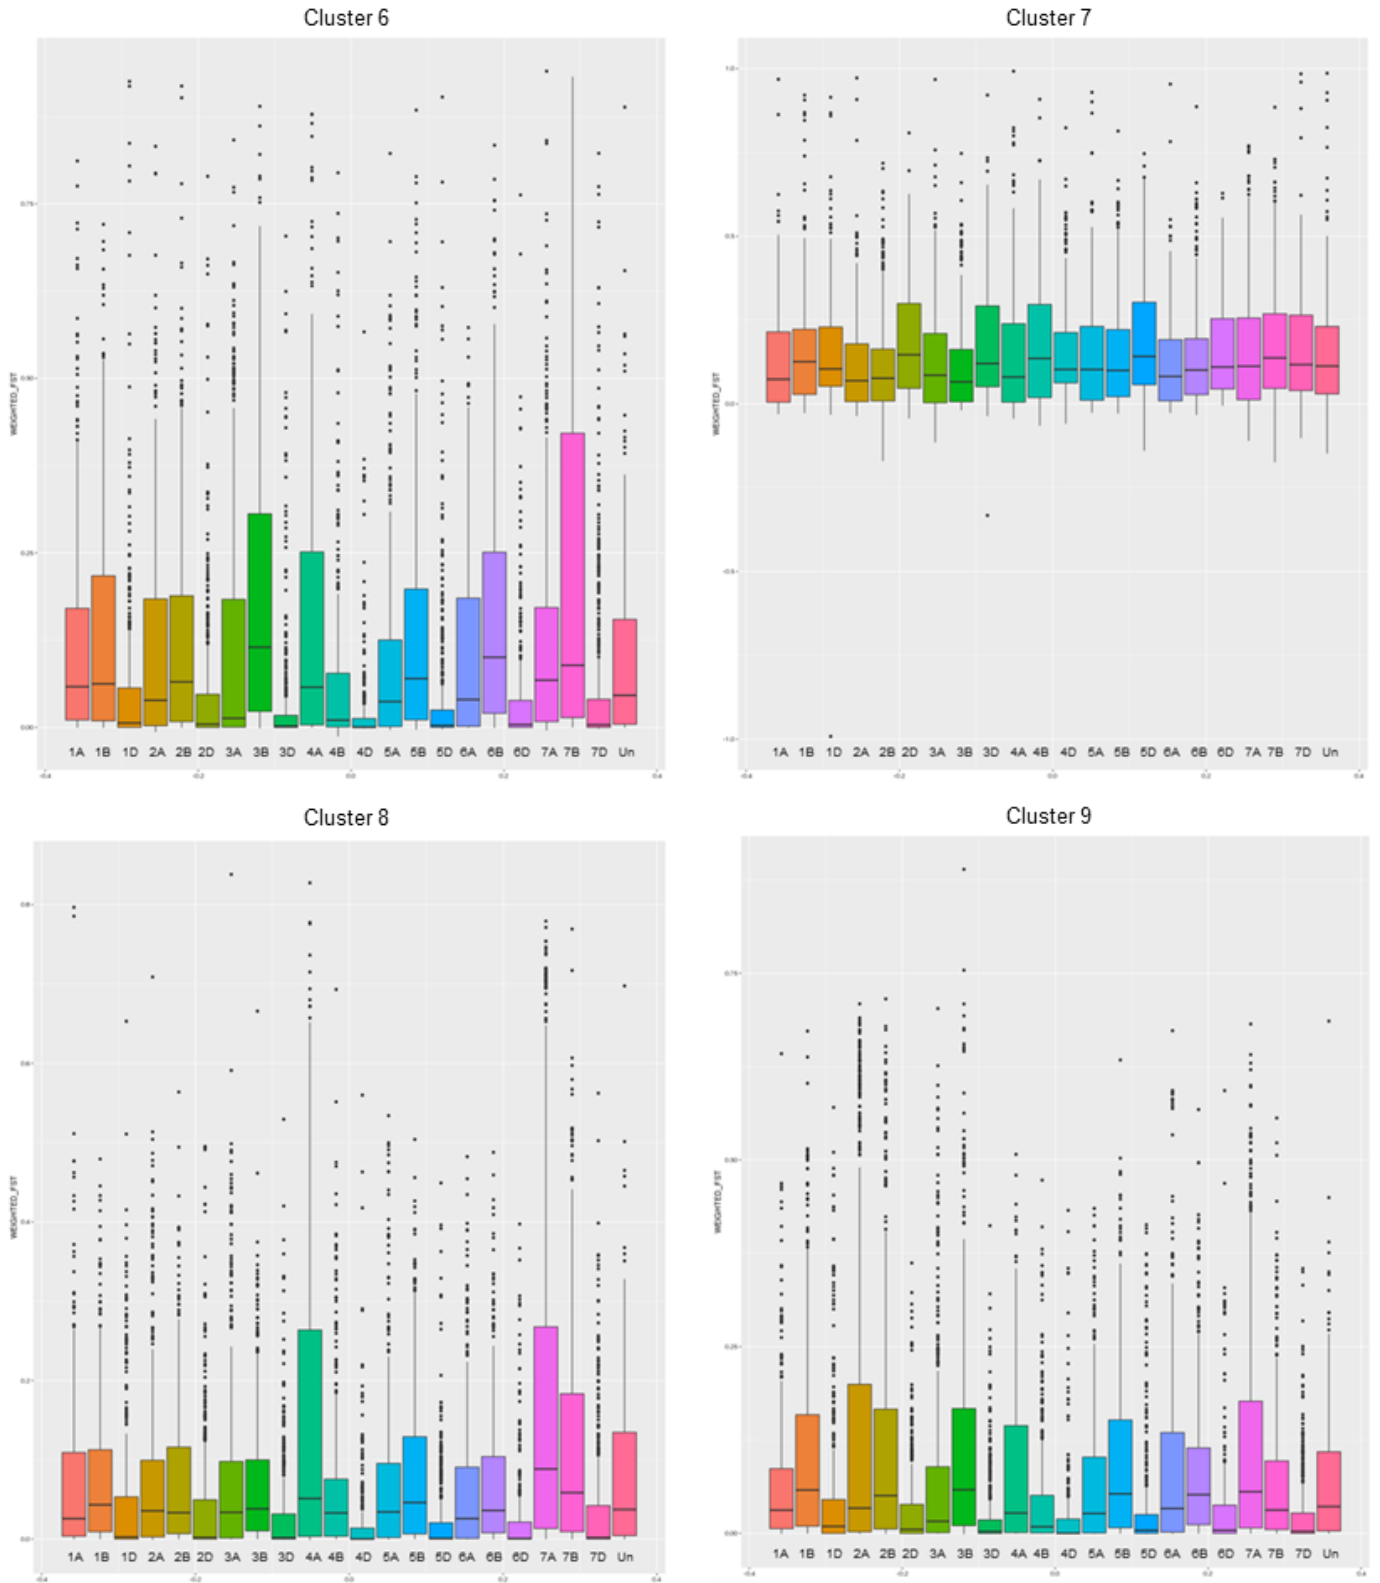

**Supplementary Figure 14. Fst analysis per chromosome in hexaploid group.**

Fst distributions across all chromosomes in the hexaploid group on cluster division 6, 7, 8 and 9.

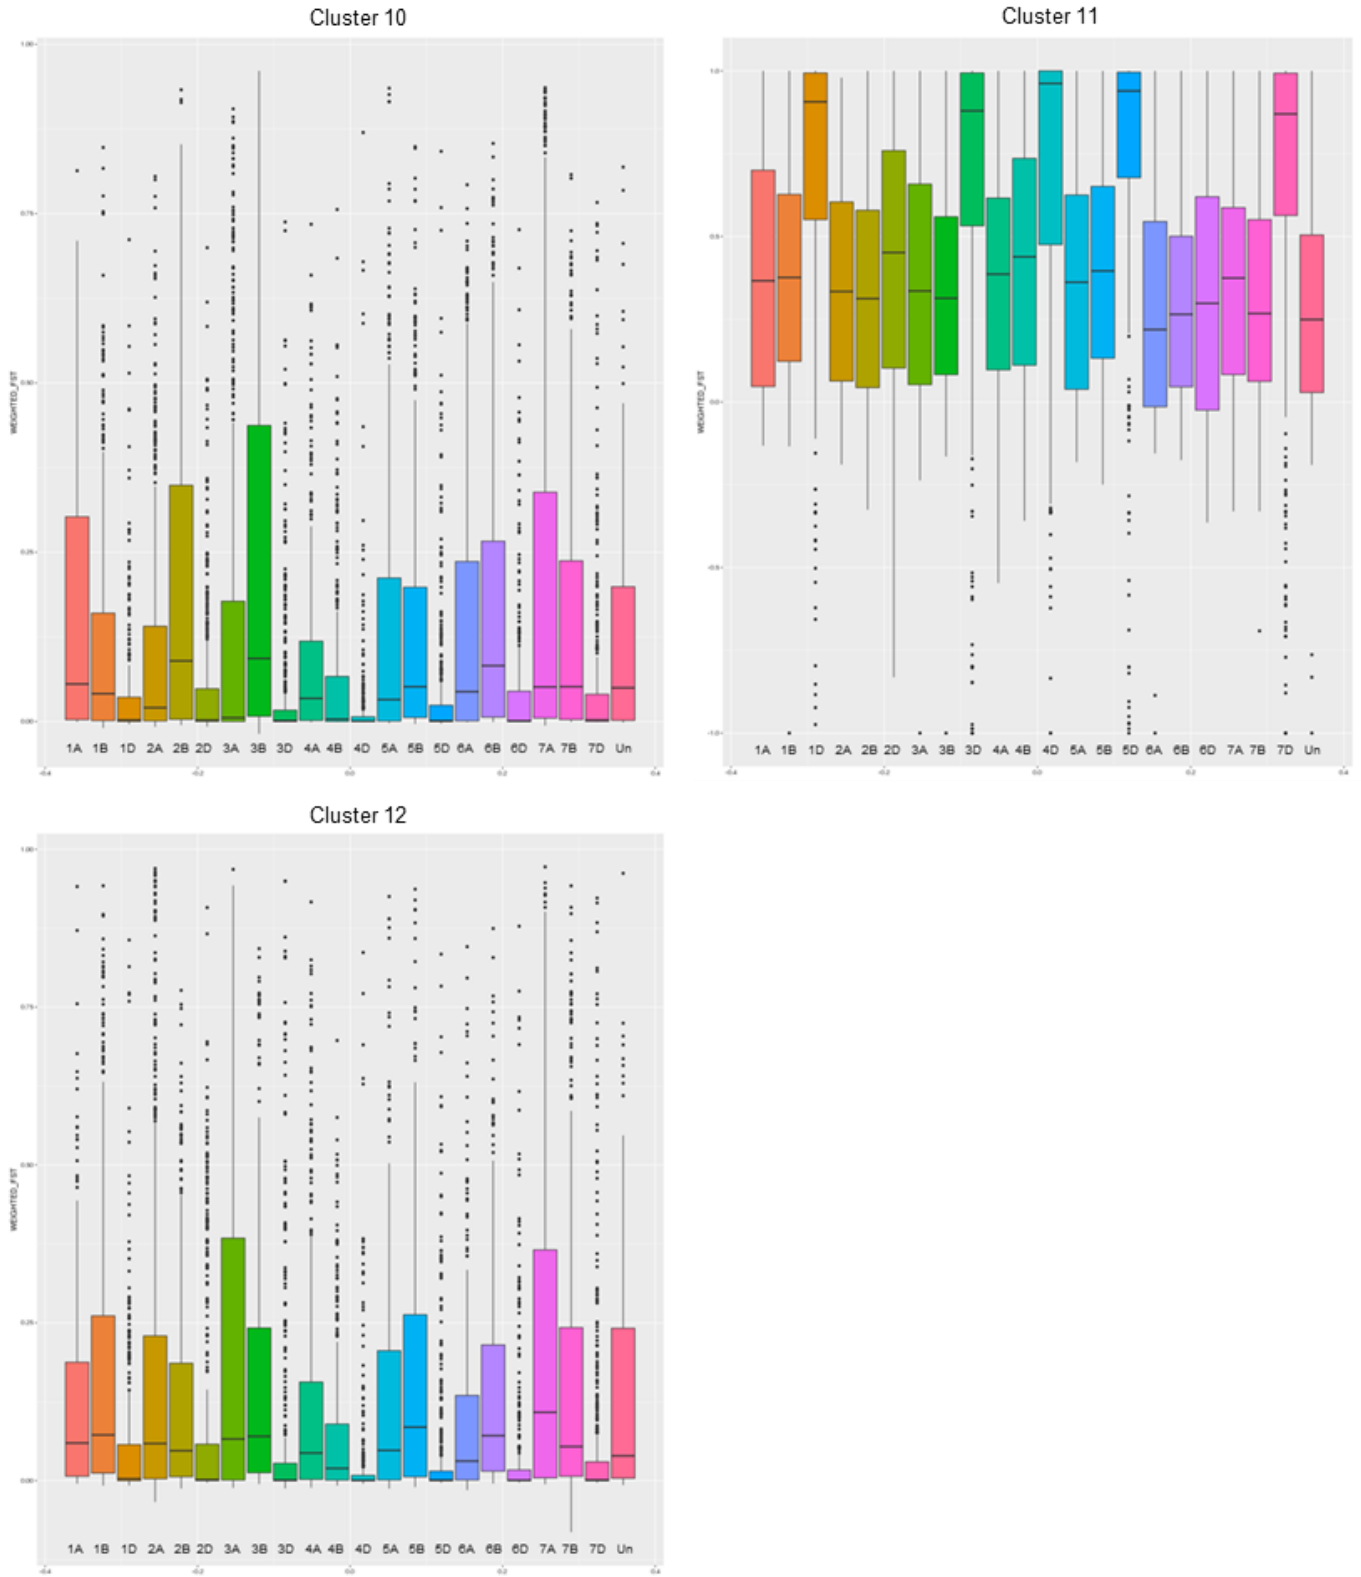

**Supplementary Figure 15. Fst analysis per chromosome in hexaploid group.**

Fst distributions across all chromosomes in the hexaploid group on cluster division 10, 11, 12.

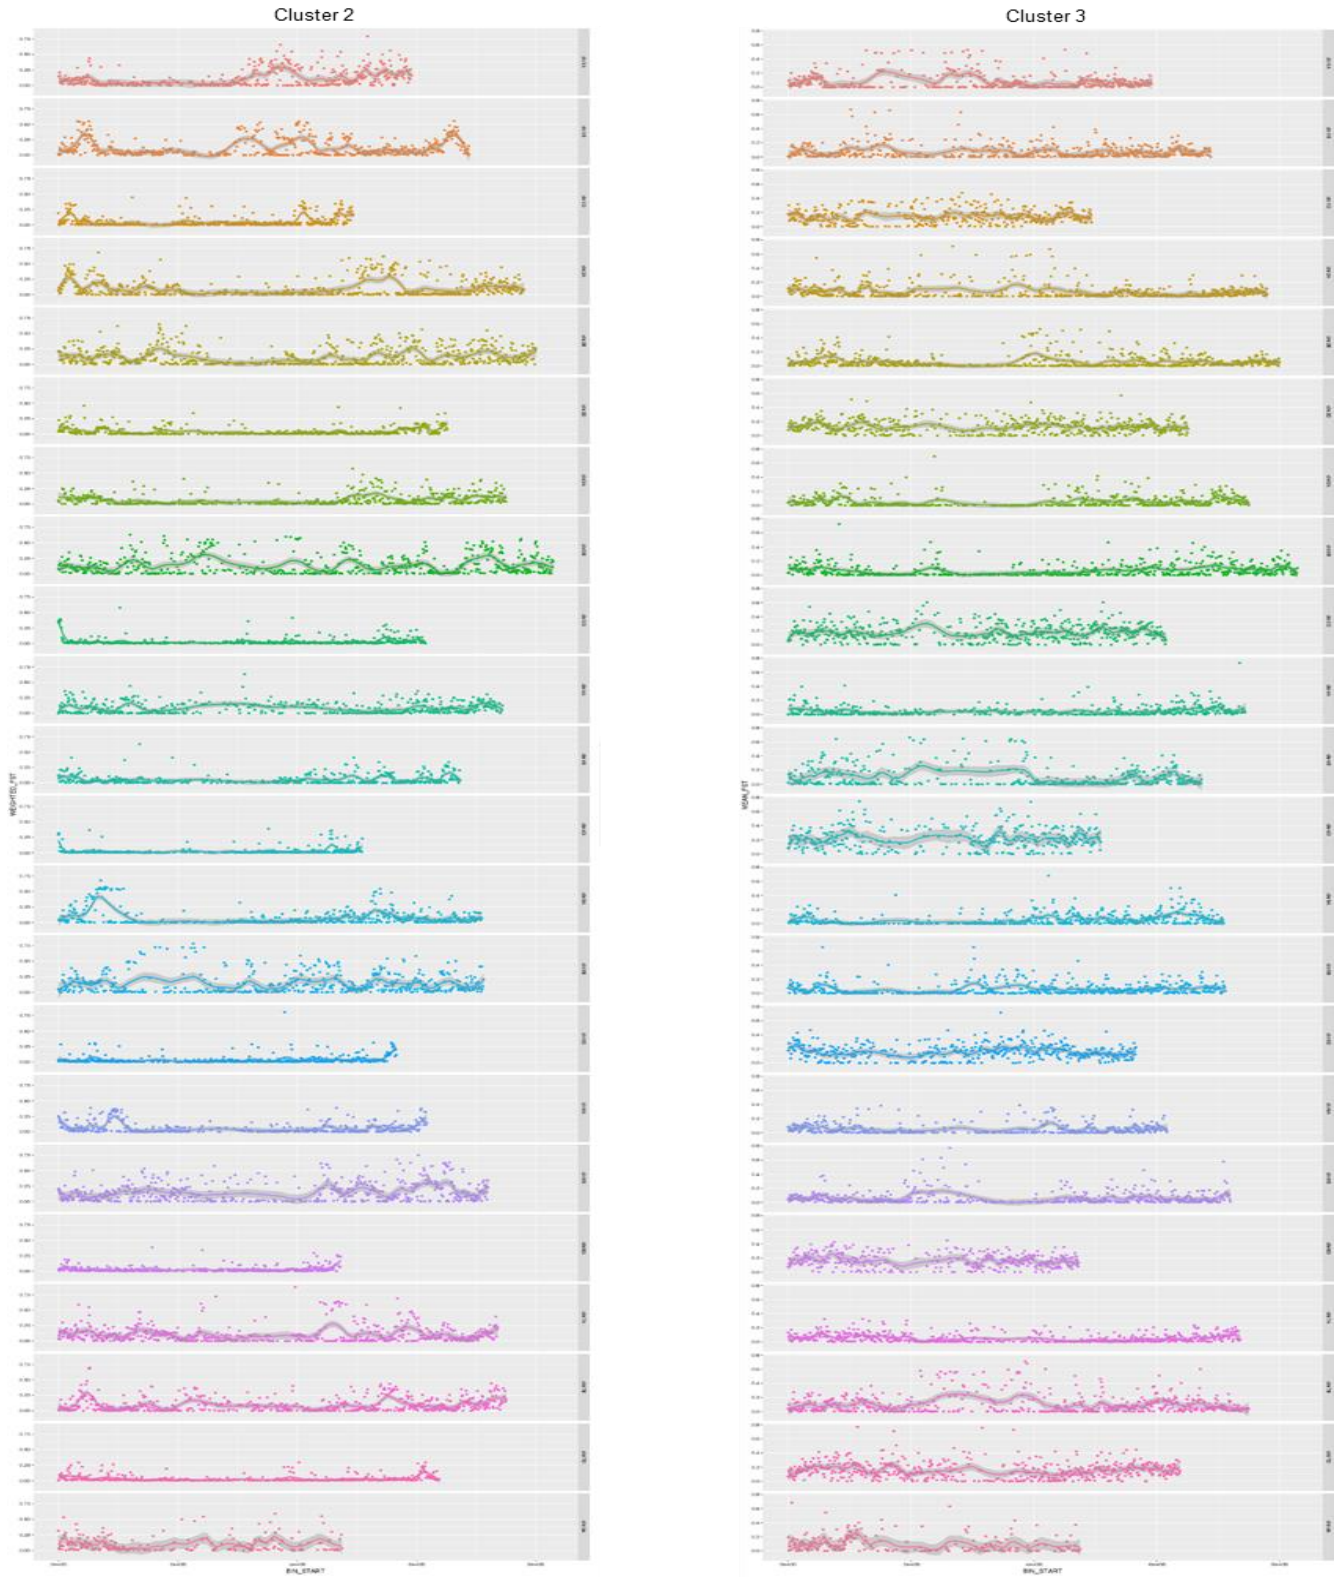

**Supplementary Figure 16. Fst analysis inside chromosomes in hexaploid group.**

Fst distributions across all chromosomes in the hexaploid group on cluster division 2 and 3.



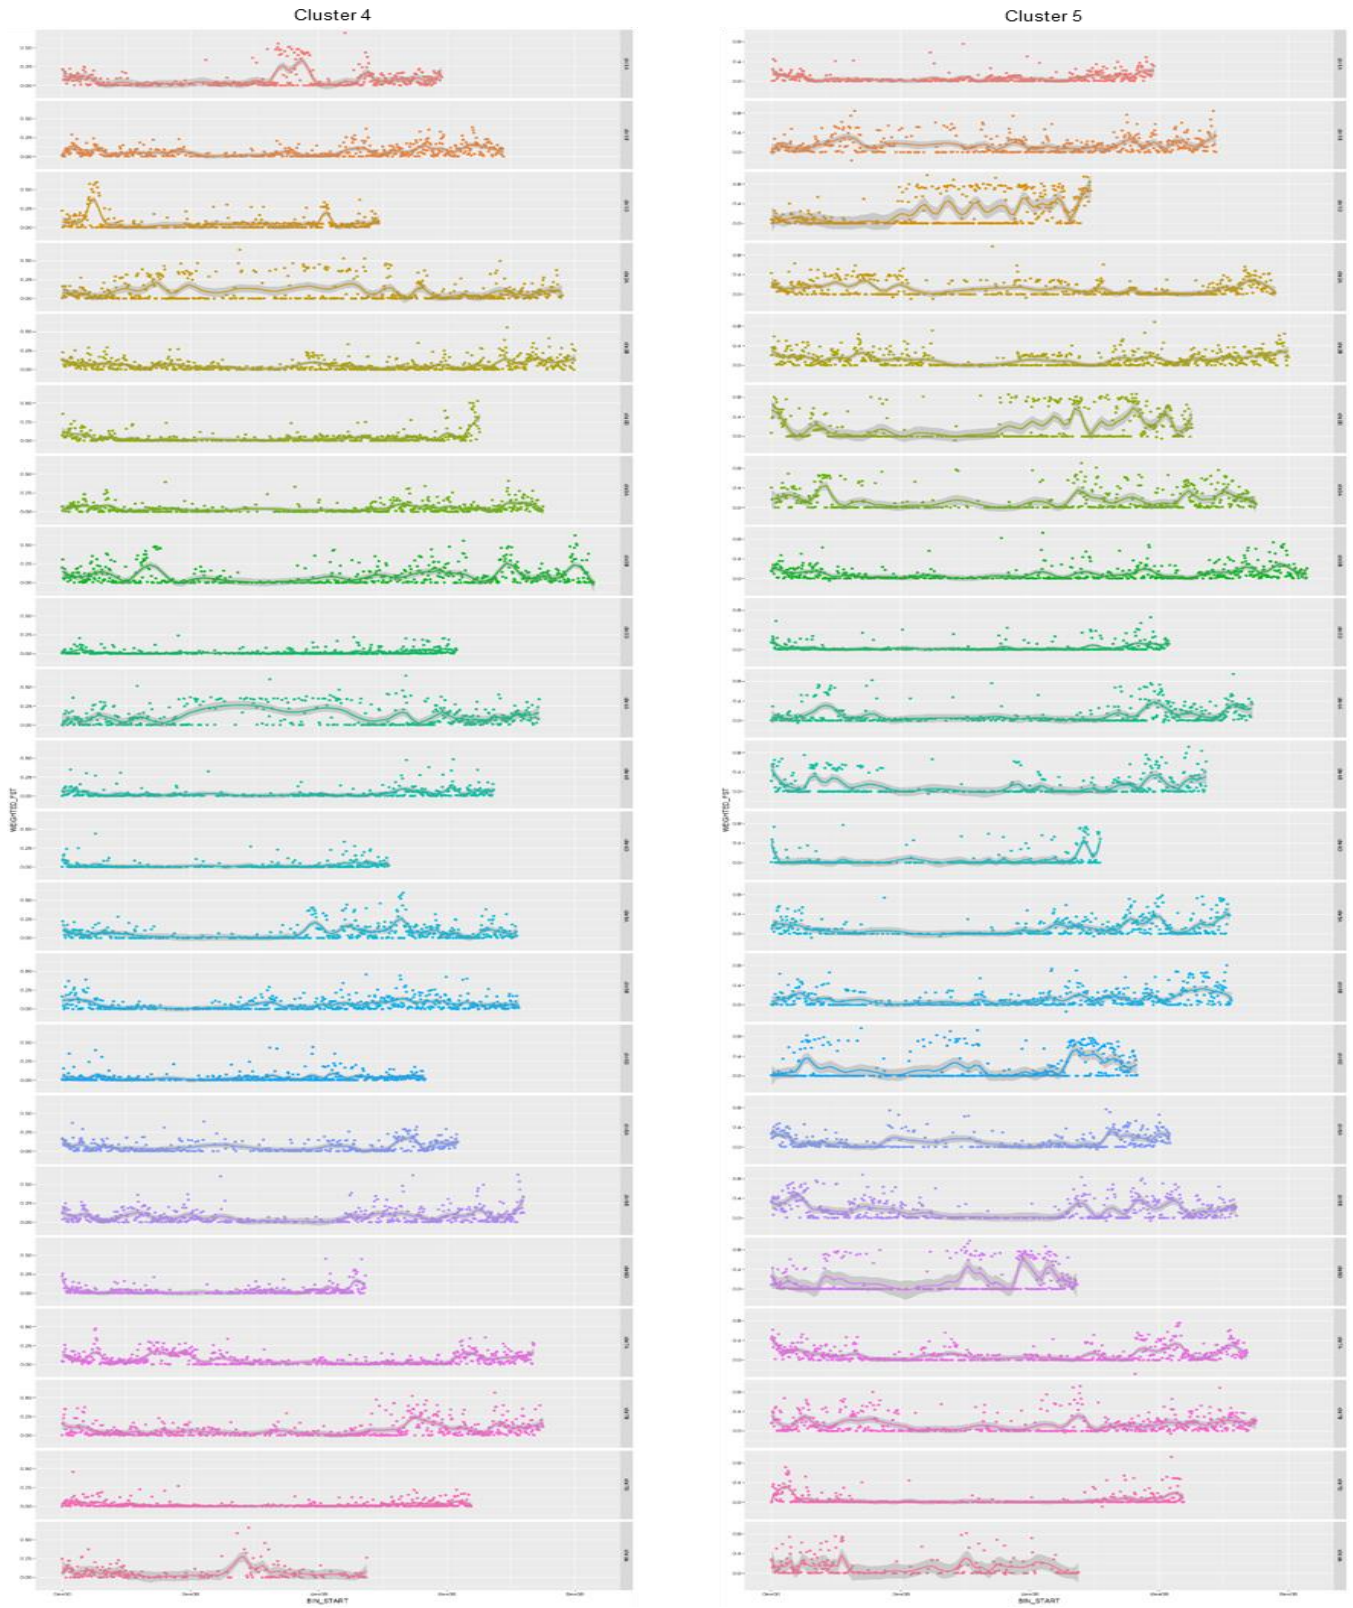

**Supplementary Figure 17. Fst analysis inside chromosomes in hexaploid group.**

Fst distributions across all chromosomes in the hexaploid group on cluster division 4 and 5.

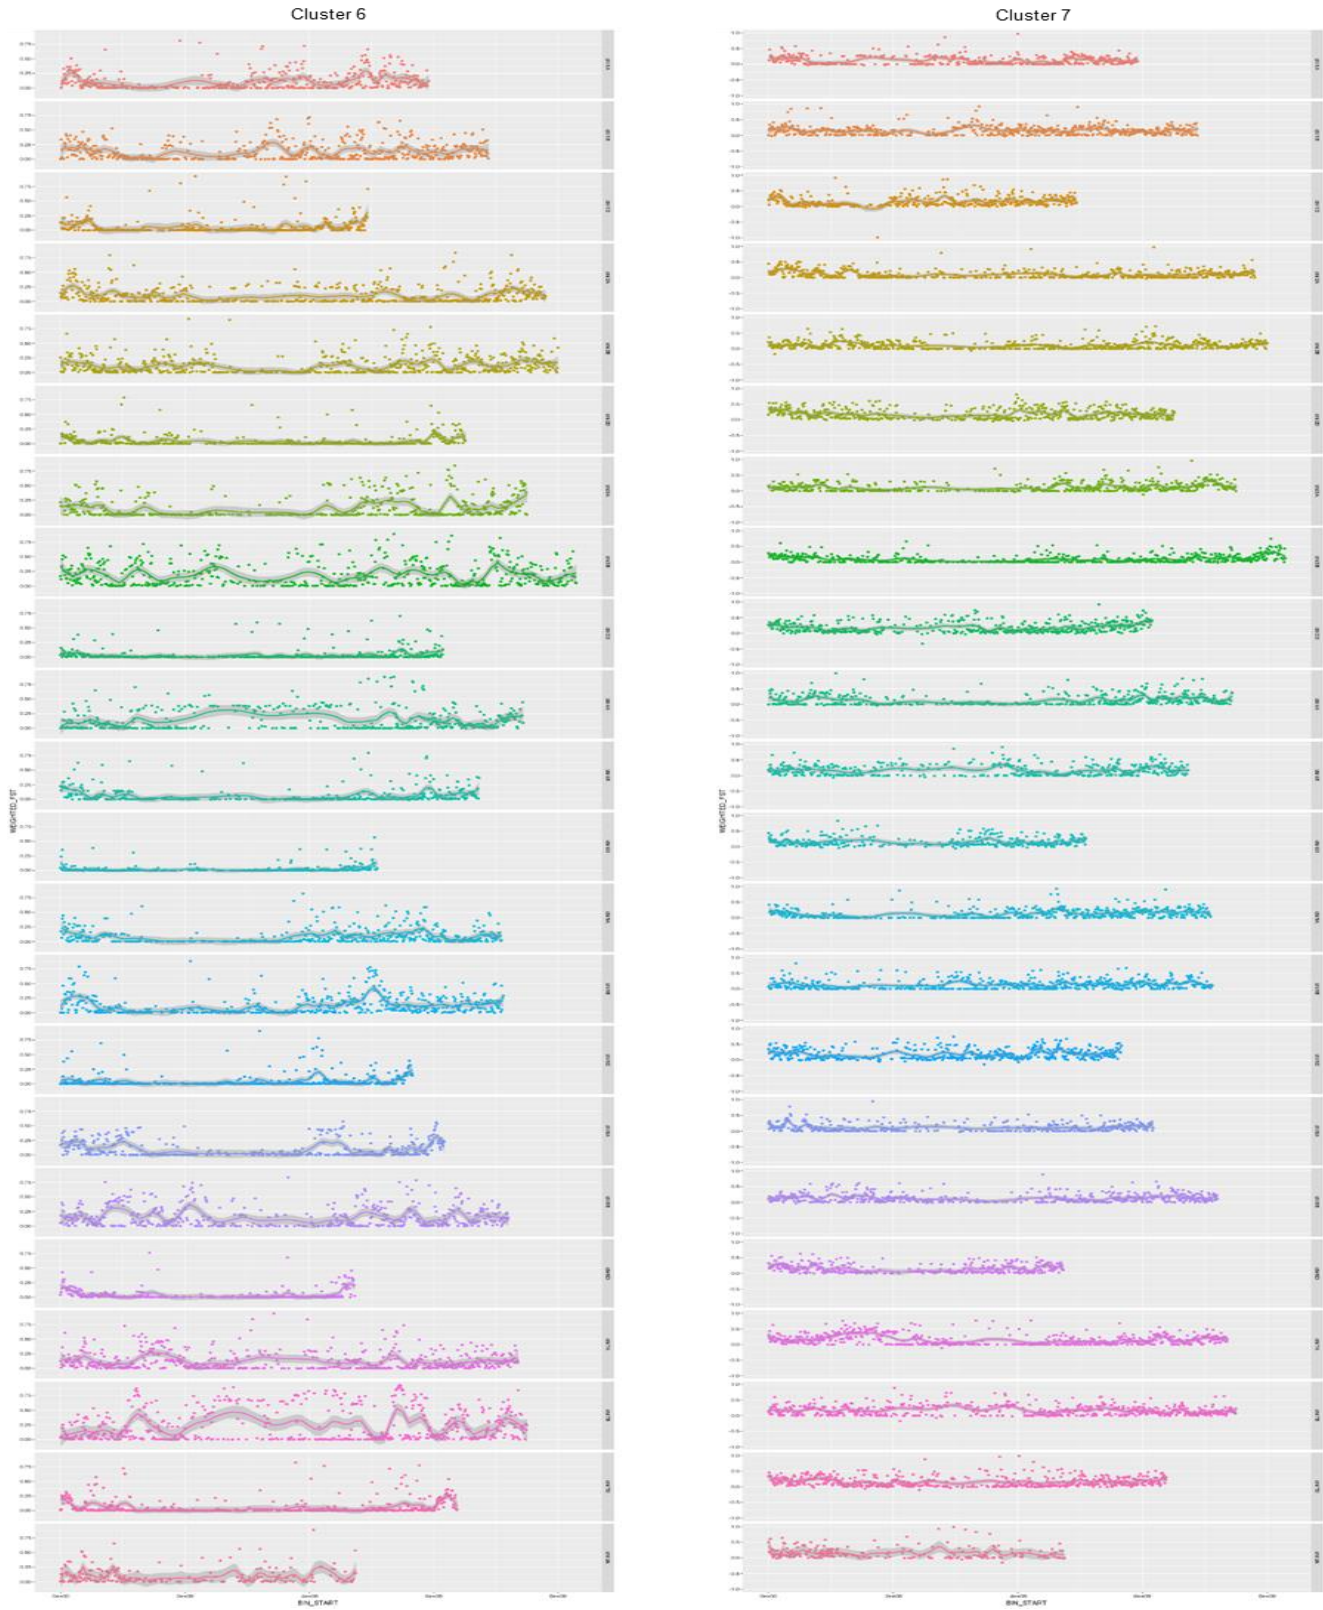

**Supplementary Figure 18. Fst analysis inside chromosomes in hexaploid group.**

Fst distributions across all chromosomes in the hexaploid group on cluster division 6 and 7.



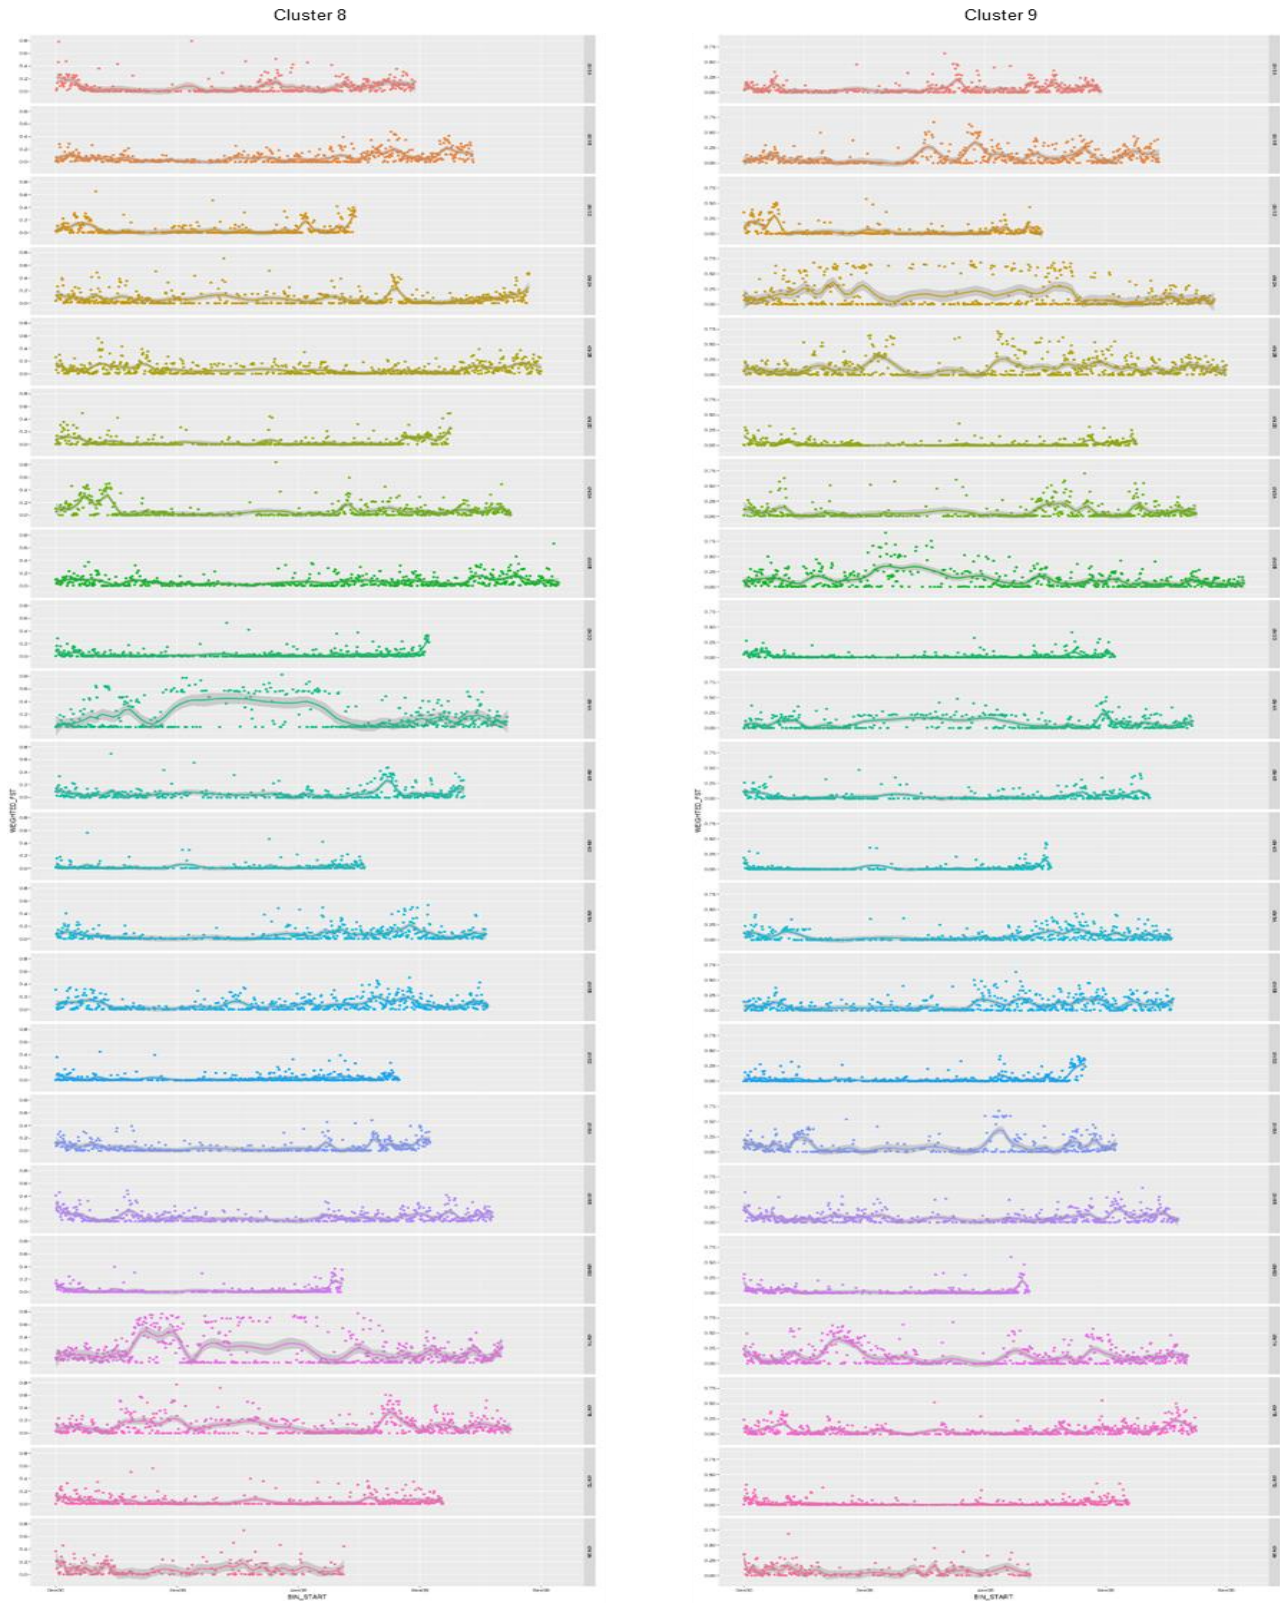

**Supplementary Figure 19. Fst analysis inside chromosomes in hexaploid group.**

Fst distributions across all chromosomes in the hexaploid group on cluster division 8 and 9.



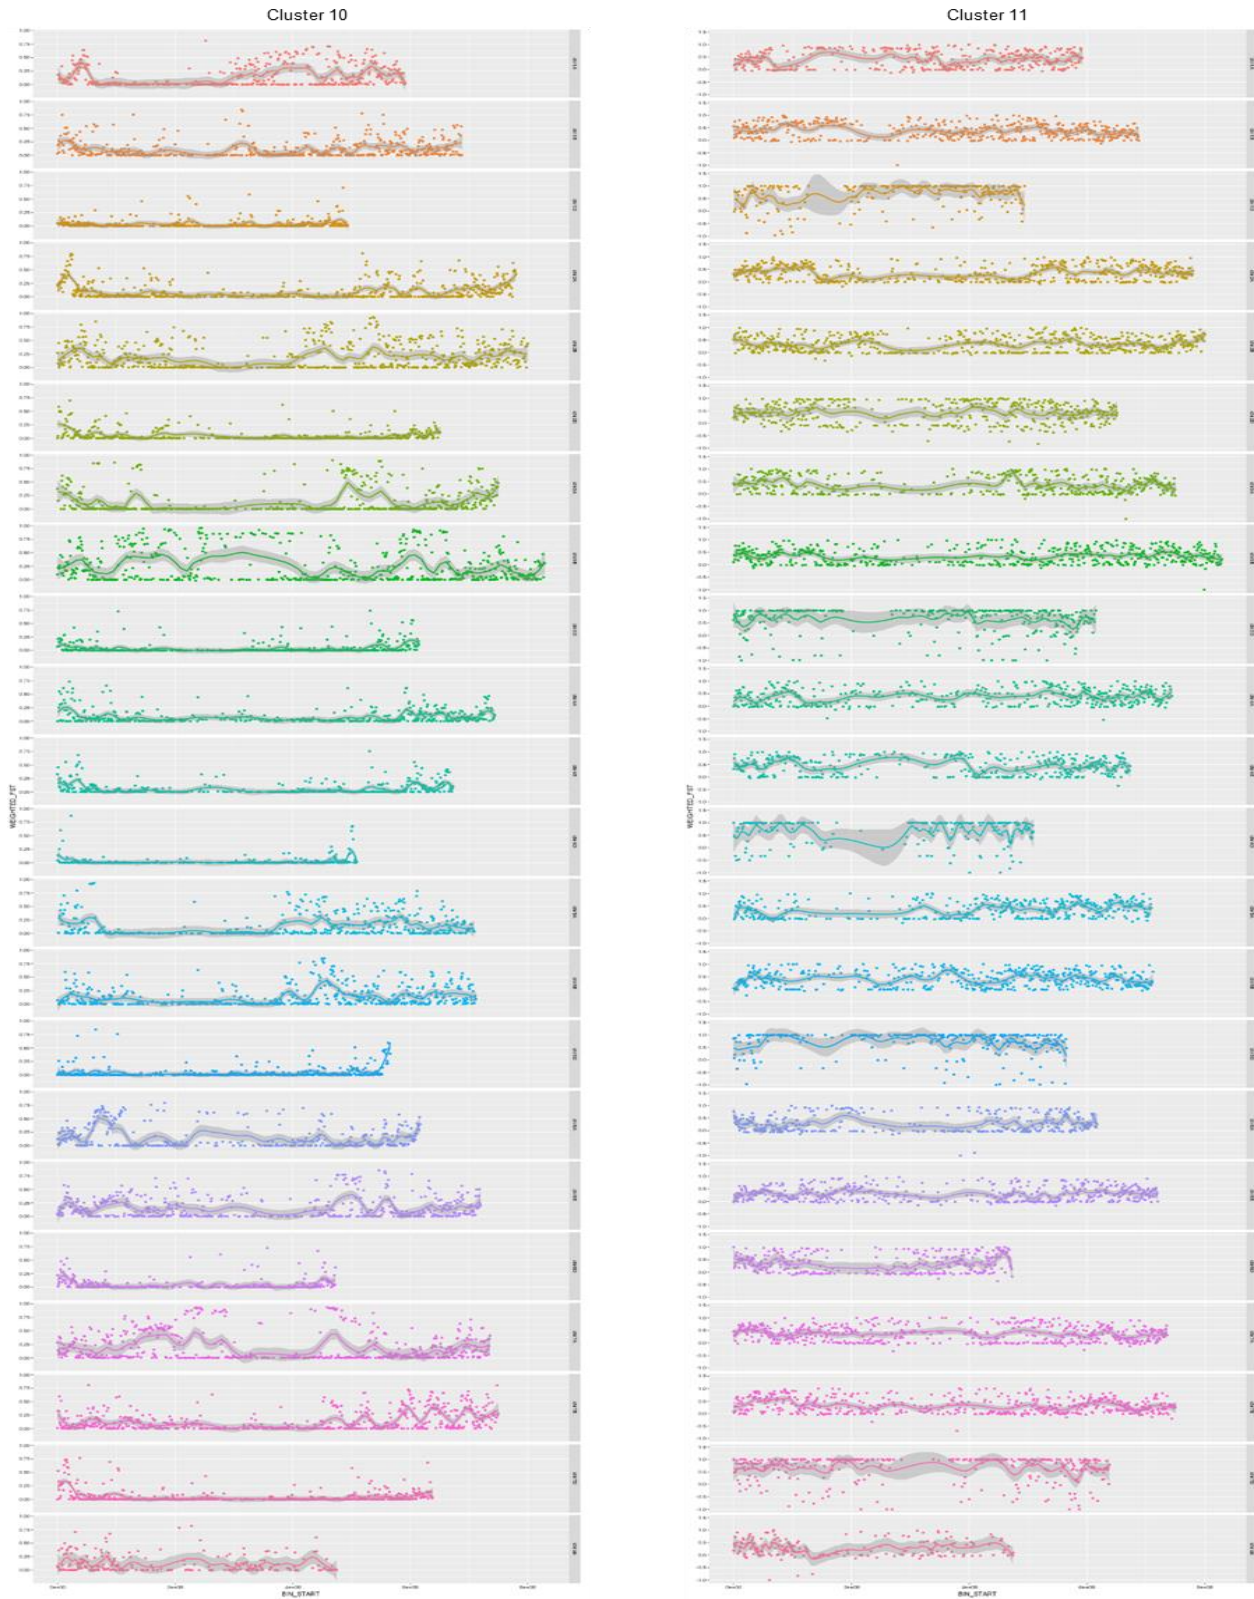

**Supplementary Figure 20. Fst analysis inside chromosomes in hexaploid group.**

Fst distributions across all chromosomes in the hexaploid group on cluster division 10 and 11.

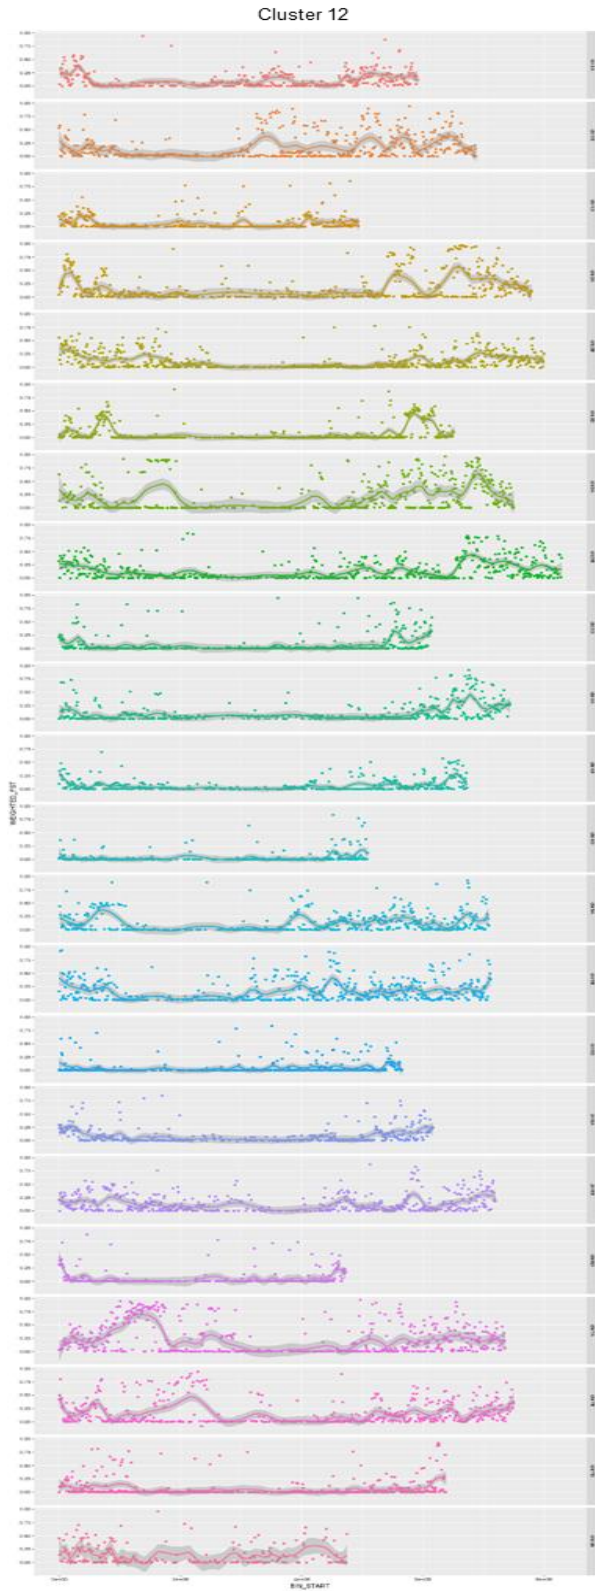

**Supplementary Figure 21. Fst analysis inside chromosomes in hexaploid group.**

Fst distributions across all chromosomes in the hexaploid group on cluster division 12.

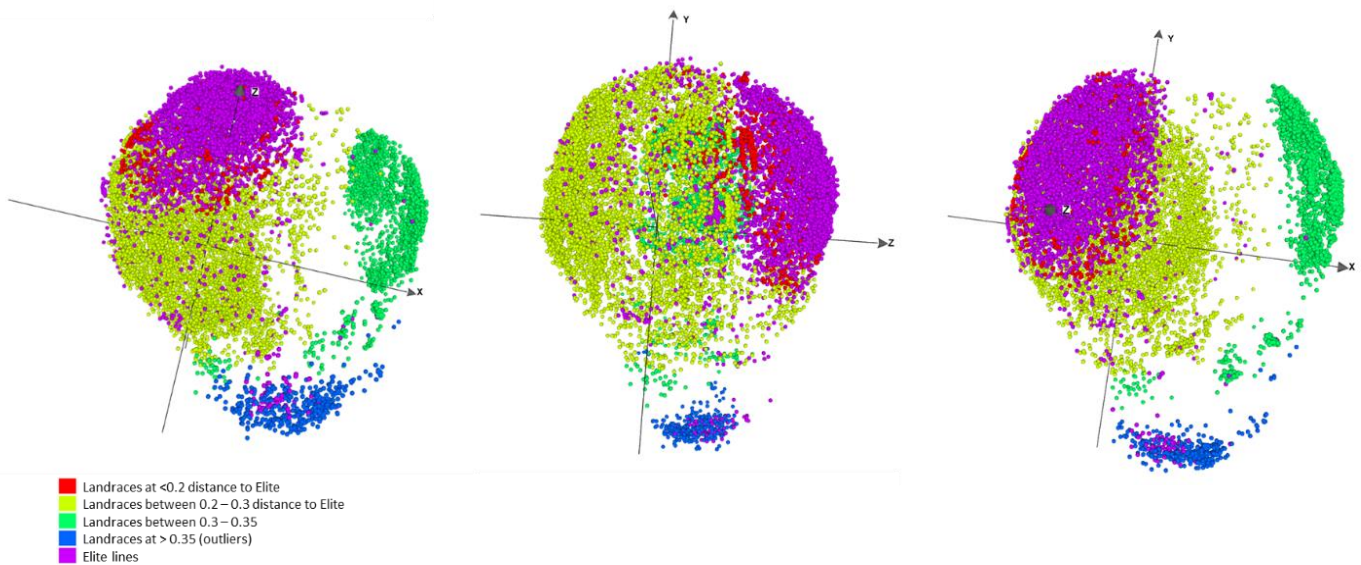

**Supplementary Figure 22. MRD between landraces and elites/synthetics in tetraploid.**

Different angles images of the MRD distance between each of the 10,801 landraces with the allelic frequencies of the group of 4,048 elite breeding lines shows four distinct groups, 837 landraces (7.8%) genetically very close to vast majority of the breeding elite lines with <0.2 distance, 6,029 landraces (55.8%) between 0.20 to 0.30 distance in which 29% of the accession are from Turkey and 10% from Iran, 3,554 (33%) between 0.30 and 0.35 distance in which 92% are form Ethiopia, and only 381 (3.5%) with more than 0.35 distance with the elite lines being 42% from Turkey.

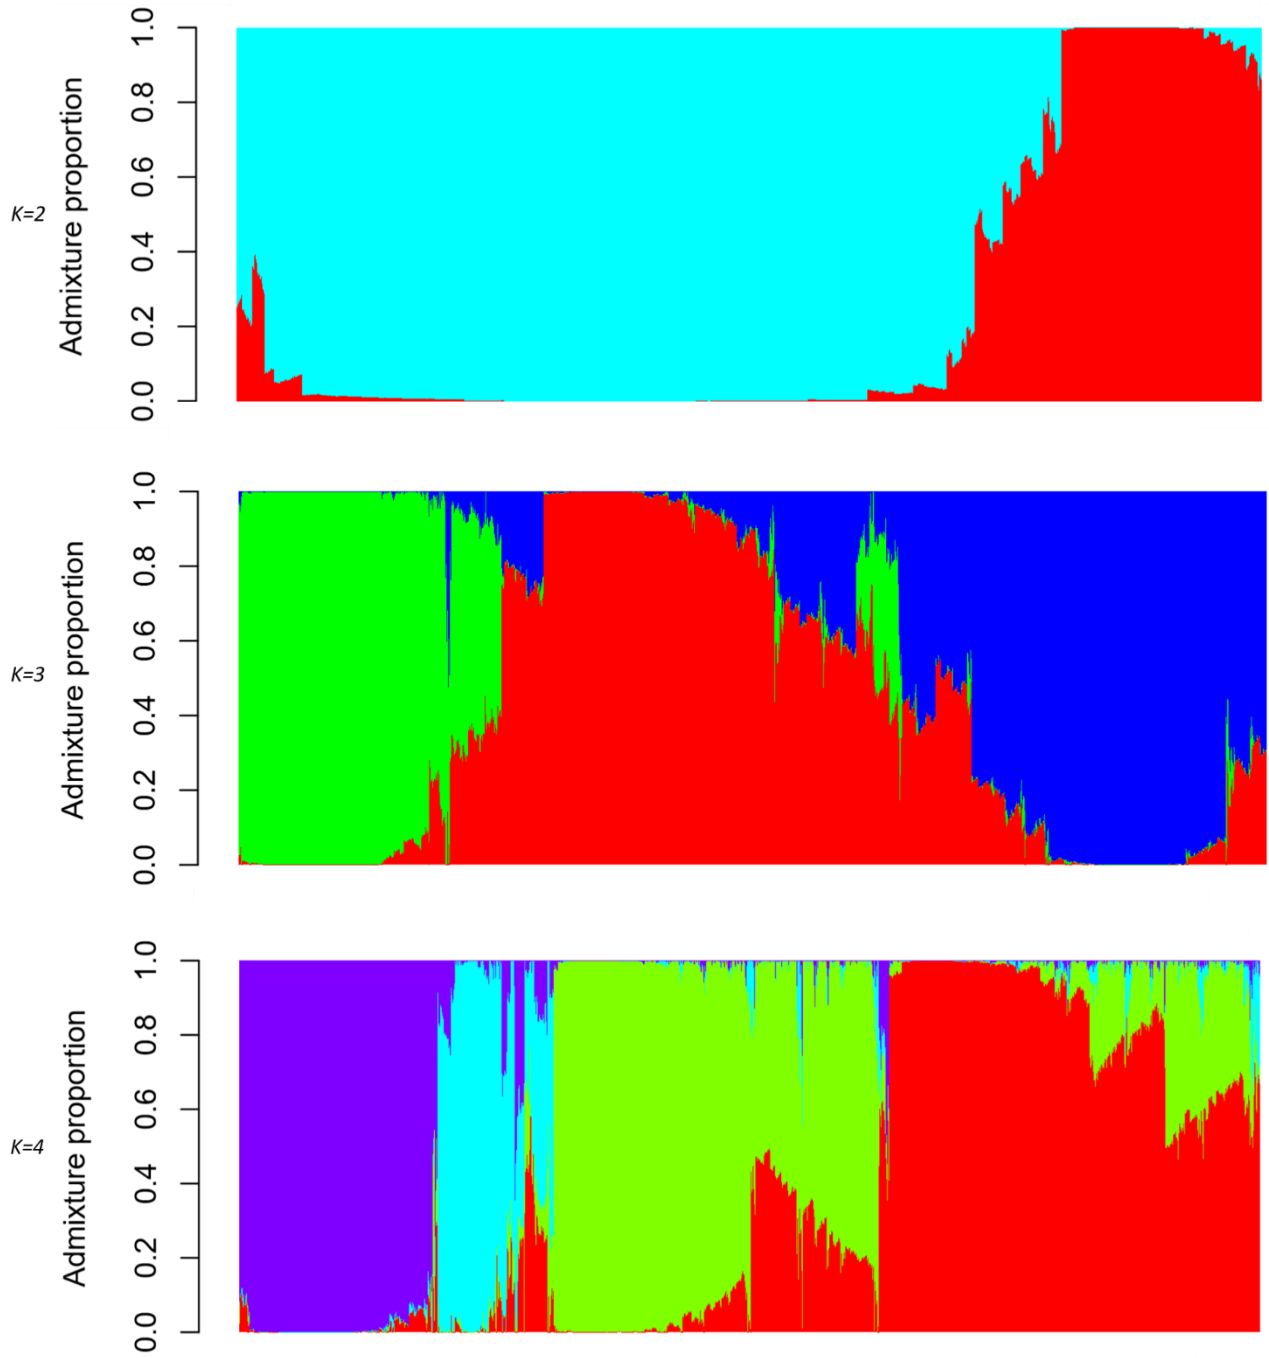

**Supplementary Figure 23. ADMIXTURE analysis in tetraploid.**

ADMIXTURE ancestry coefficients of a subset of tetraploid samples in  $K=2$ ,  $K=3$  and  $k=4$ .

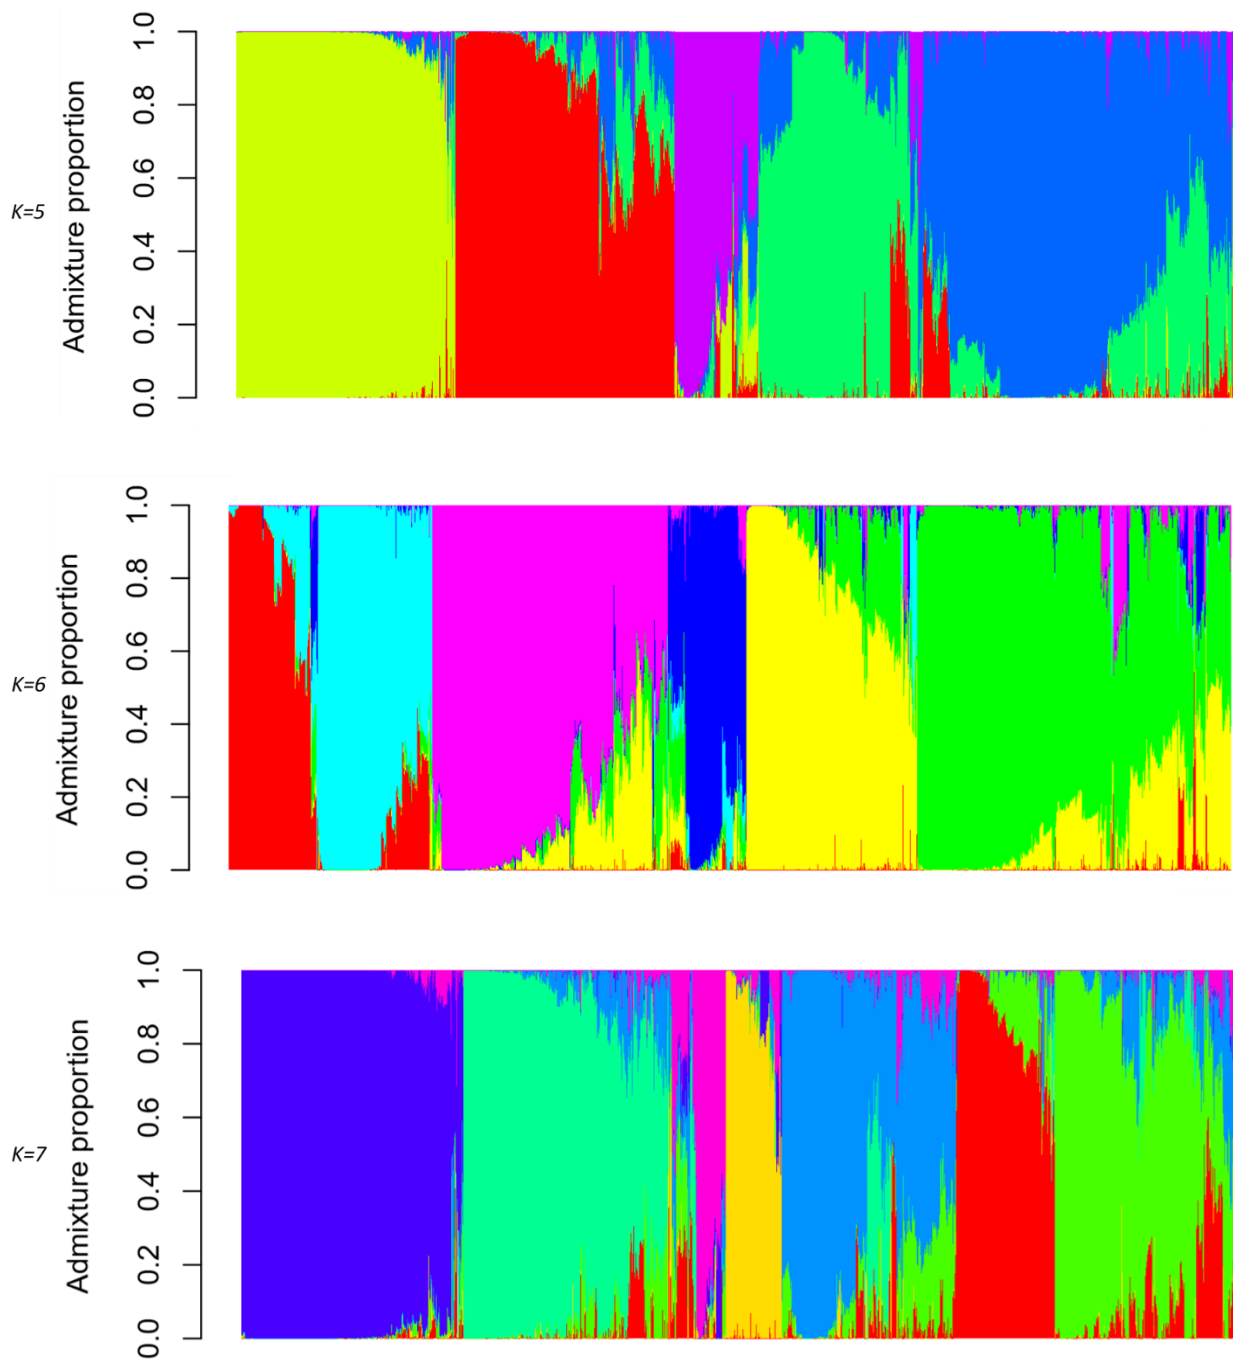

**Supplementary Figure 24. ADMIXTURE analysis in tetraploid.**

ADMIXTURE ancestry coefficients of a subset of tetraploid samples in  $K=5$ ,  $K=6$  and  $k=7$ .

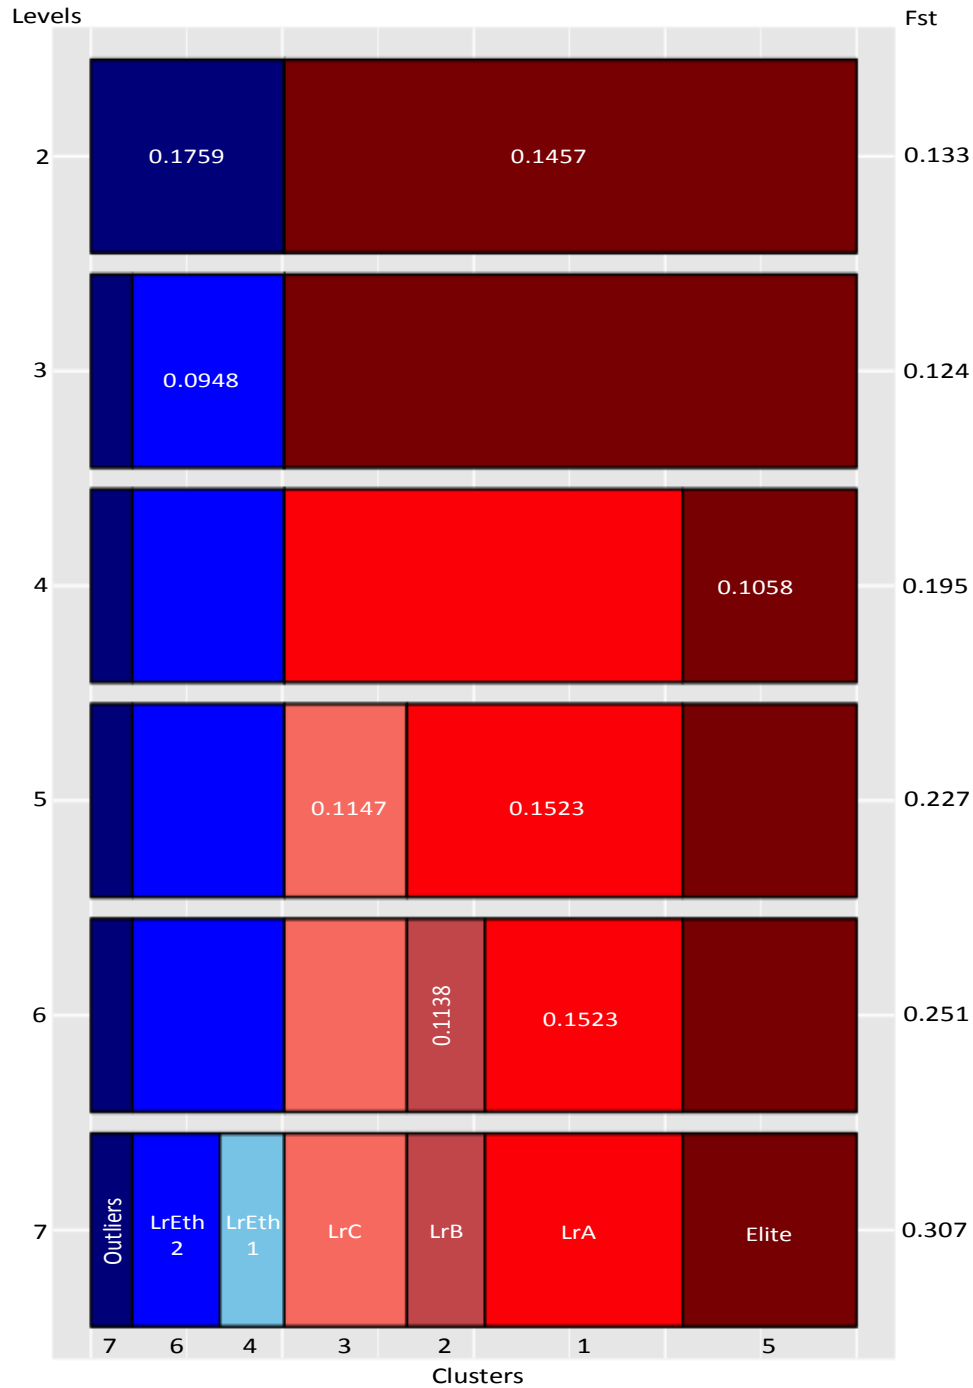

**Supplementary Figure 25. Representation of the distribution of 7 groups based on clusters analysis.** The size of the boxes is proportional to the number of accession. In the right side are the Fixation index (Fst) values and inside the boxes the expected heterocigosity (He) of each group and in the last boxes in group 7 are identified each group with a brief description and the number which correspond to Curlywhirly group.



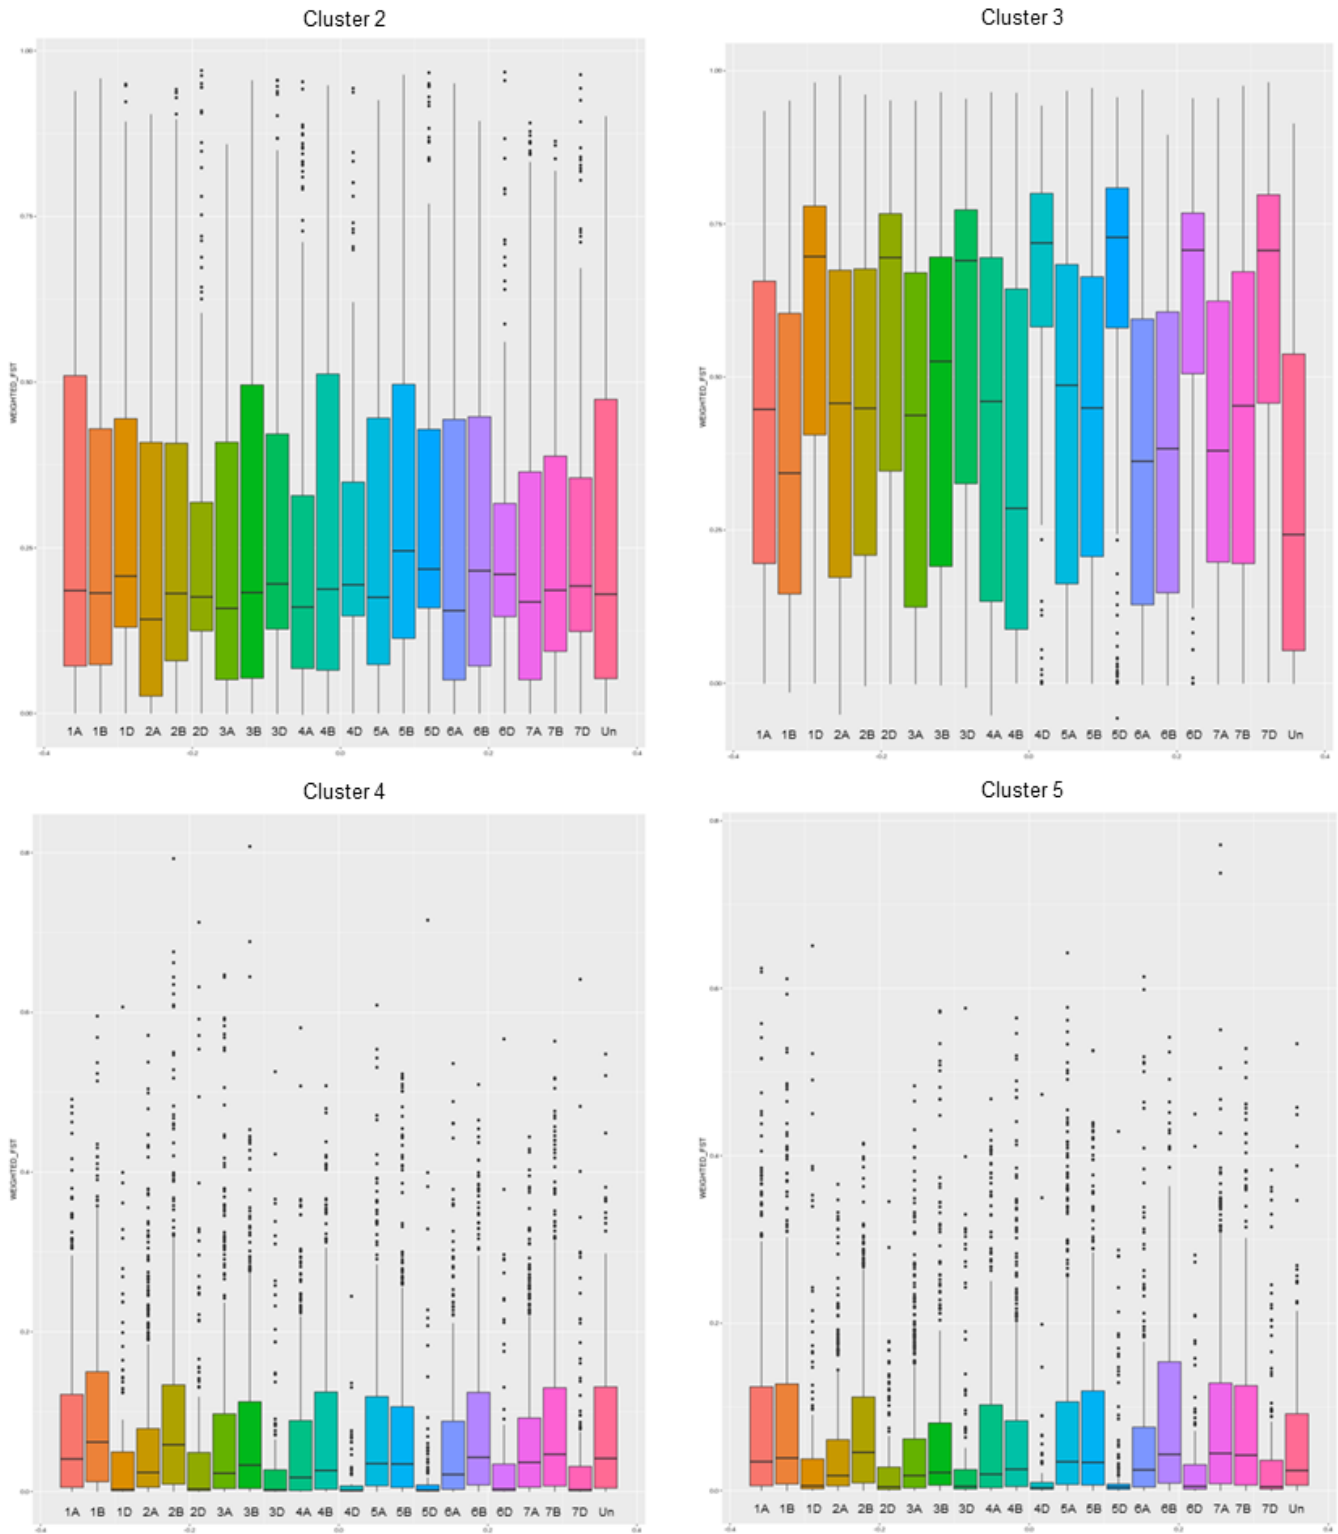

**Supplementary Figure 26. Fst analysis per chromosome in tetraploid group.**

Fst distributions across all chromosomes in the tetraploid group on cluster division 2, 3, 4 and 5.

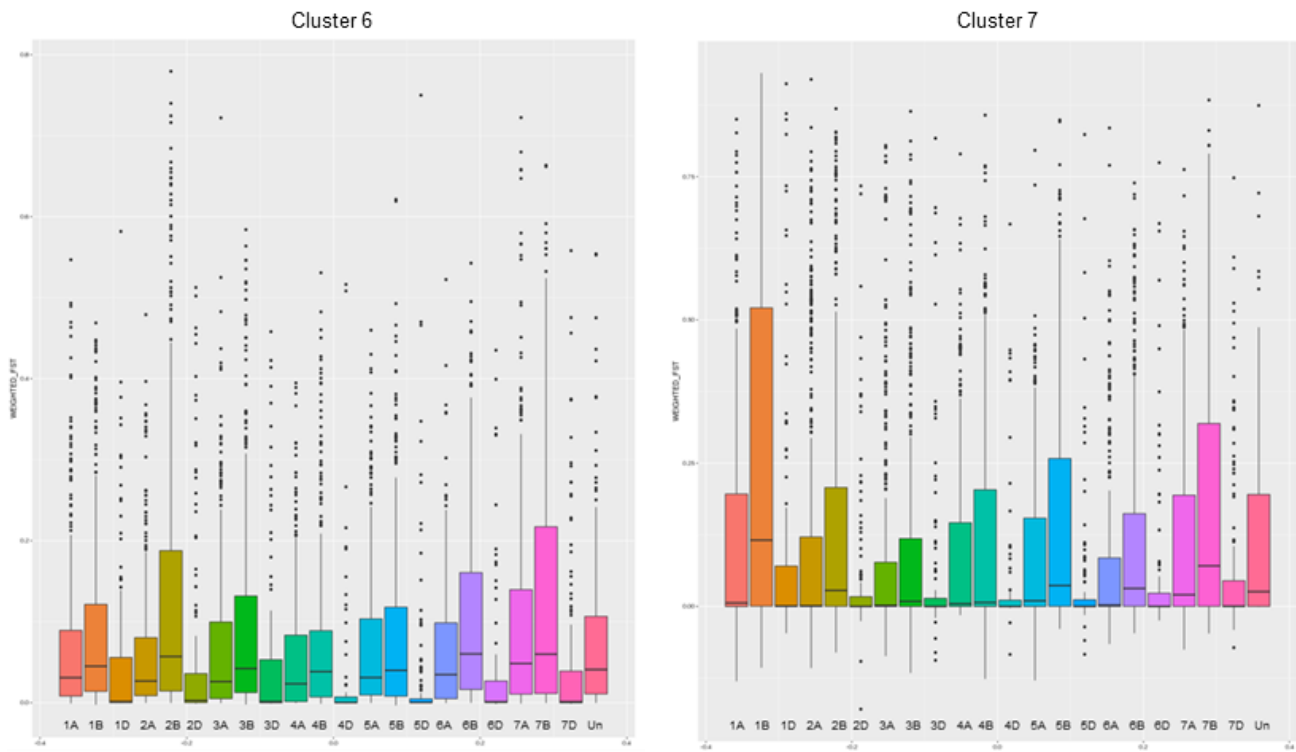

**Supplementary Figure 27. Fst analysis per chromosome in tetraploid group.**

Fst distributions across all chromosomes in the tetraploid group on cluster division 6 and 7.



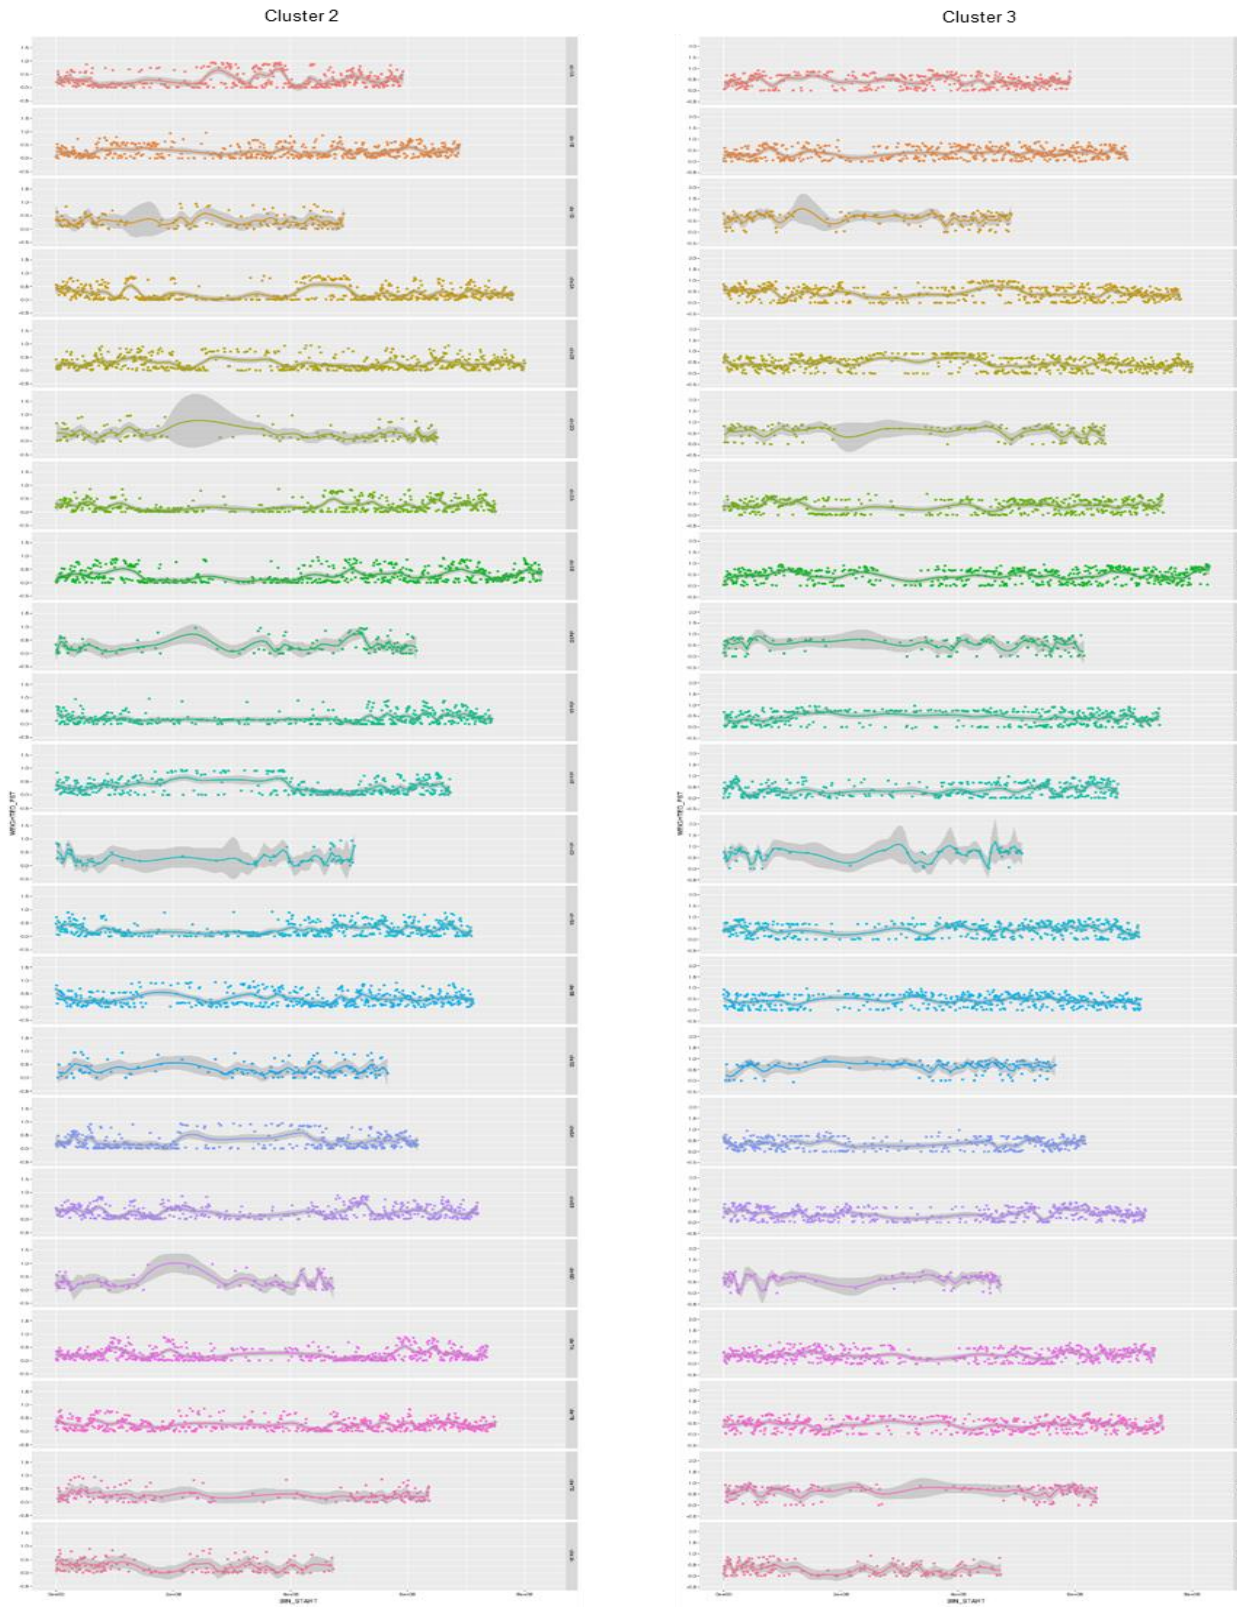

**Supplementary Figure 28. Fst analysis inside chromosomes in tetraploid group.**

Fst distributions across all chromosomes in the tetraploid group on cluster division 2 and 3.

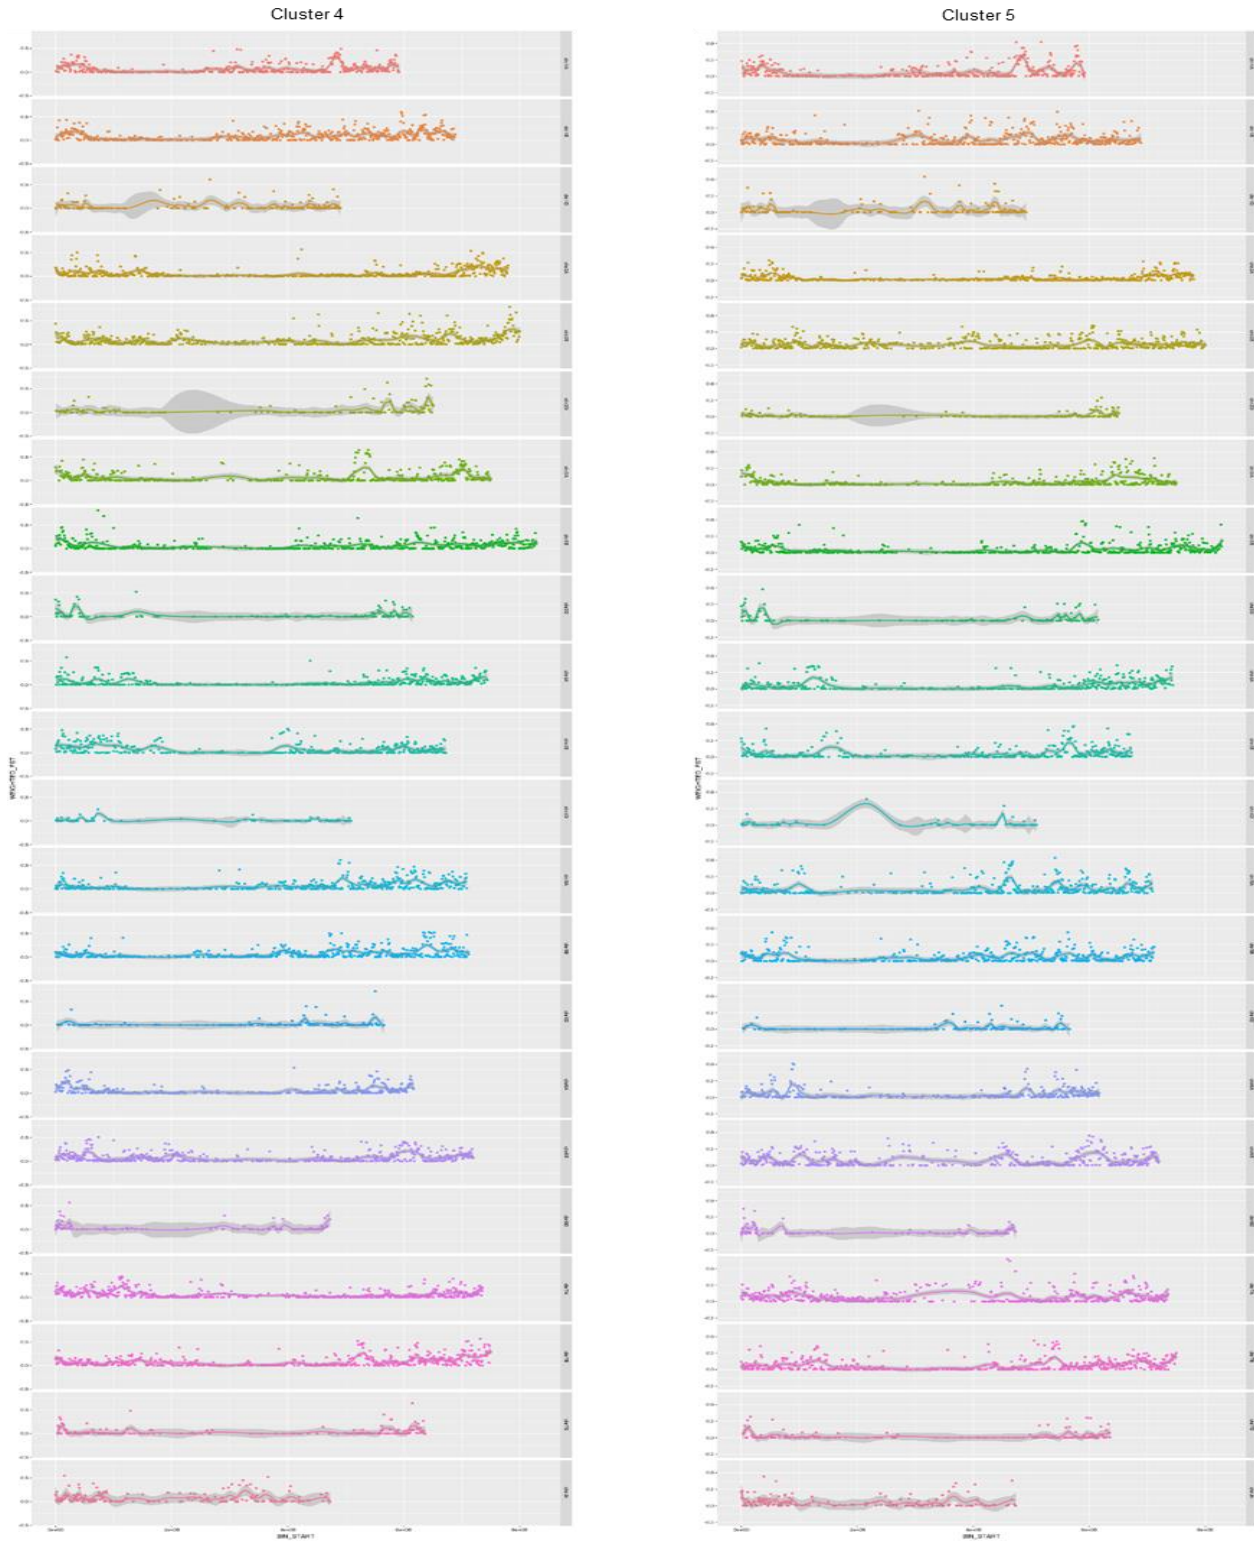

**Supplementary Figure 29. Fst analysis inside chromosomes in tetraploid group.**

Fst distributions across all chromosomes in the tetraploid group on cluster division 4 and 5.

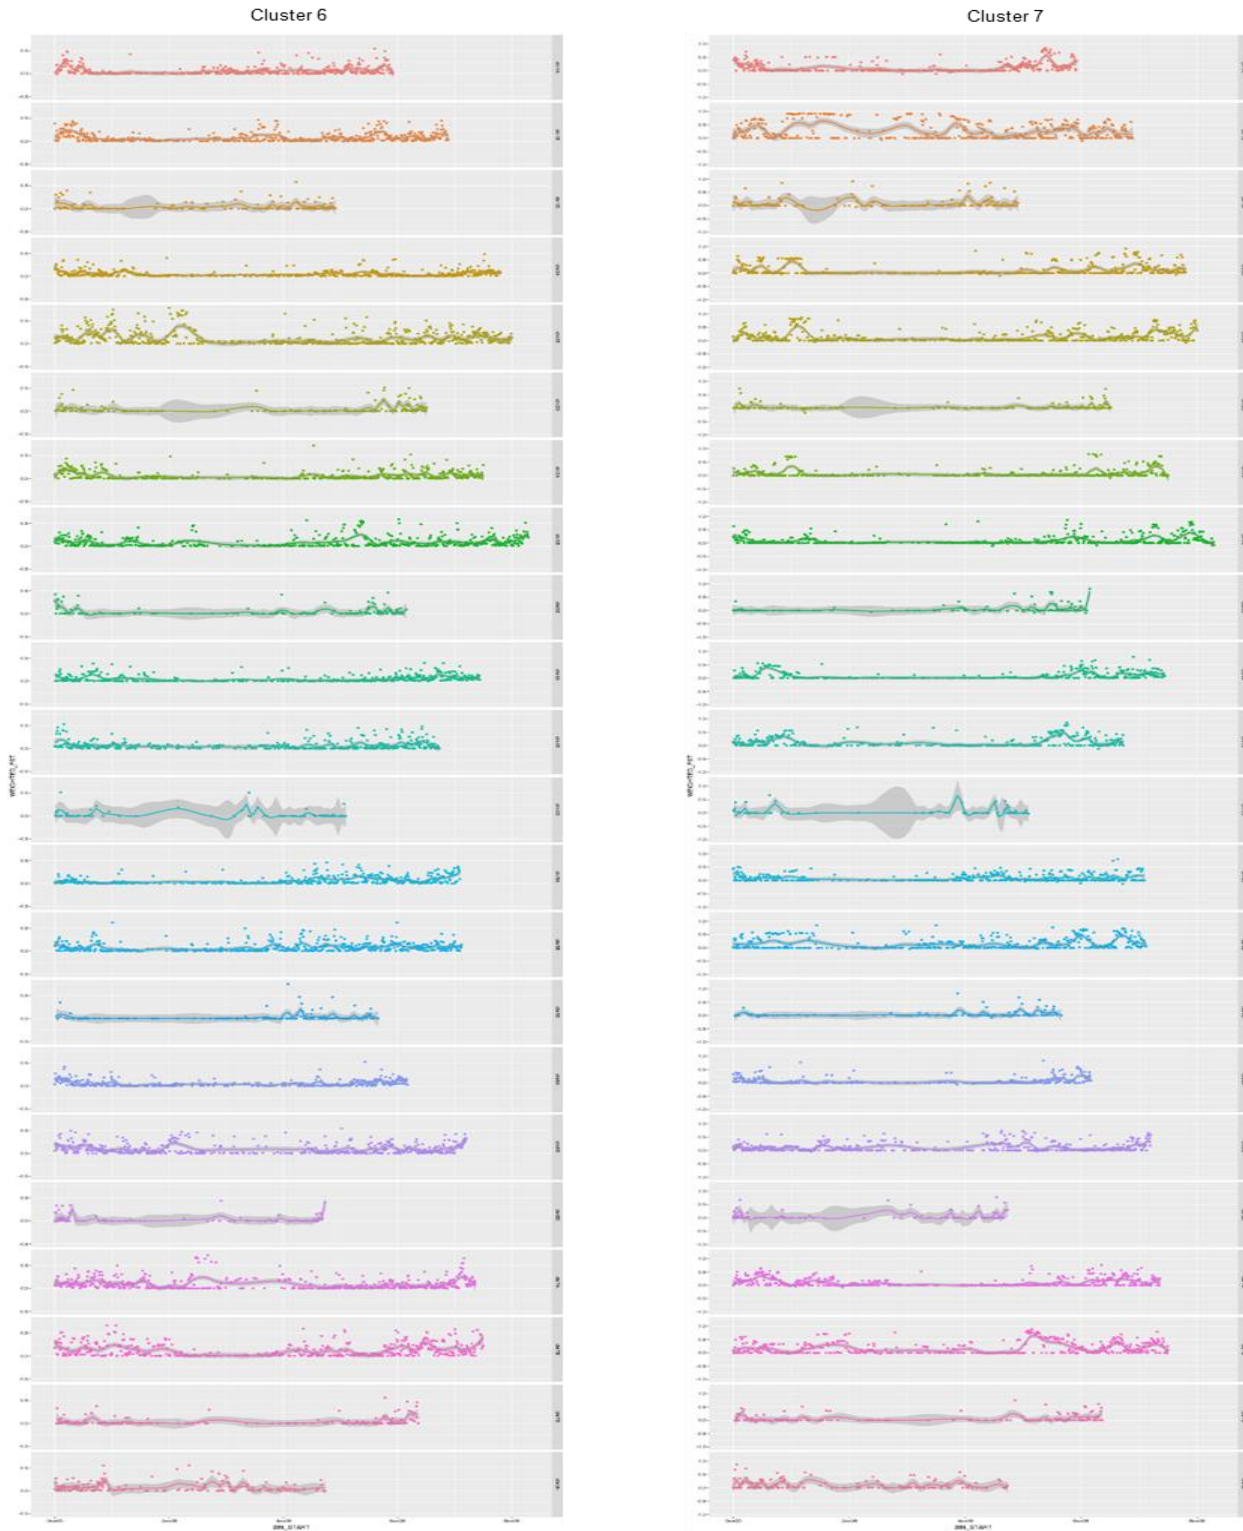

**Supplementary Figure 30. Fst analysis inside chromosomes in tetraploid group.**

Fst distributions across all chromosomes in the tetraploid group on cluster division 6 and 7.

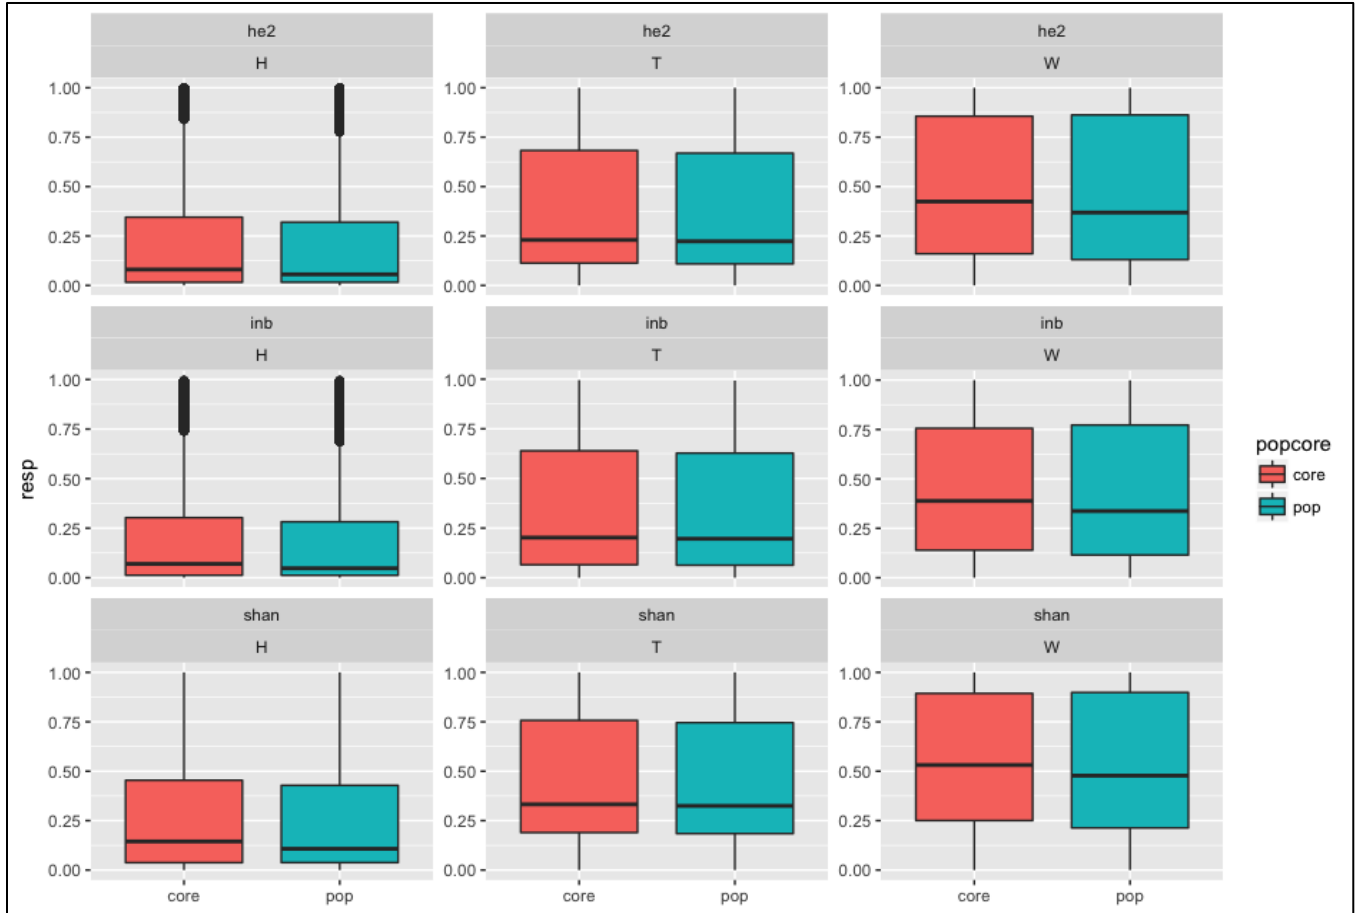

**Supplementary Figure 31. Boxplots of diversity indexes.**

Expected heterocigosity (He2), Inbreeding (inb) and Shanon index (shan) in the core subset (red) and in the complete population (blue) across the three biological groups, hexaploid (H), tetraploid (T) and CWR (W). Upper box = percentile 75, lower box= perceptible 25, line in the box = Median, lower line (whisker) = 1.5\* (percentile 25), upper whisker = 1.5\*(percentile 75), dots at top: outliers = values greater than the 1.5\*(P75 whisker).



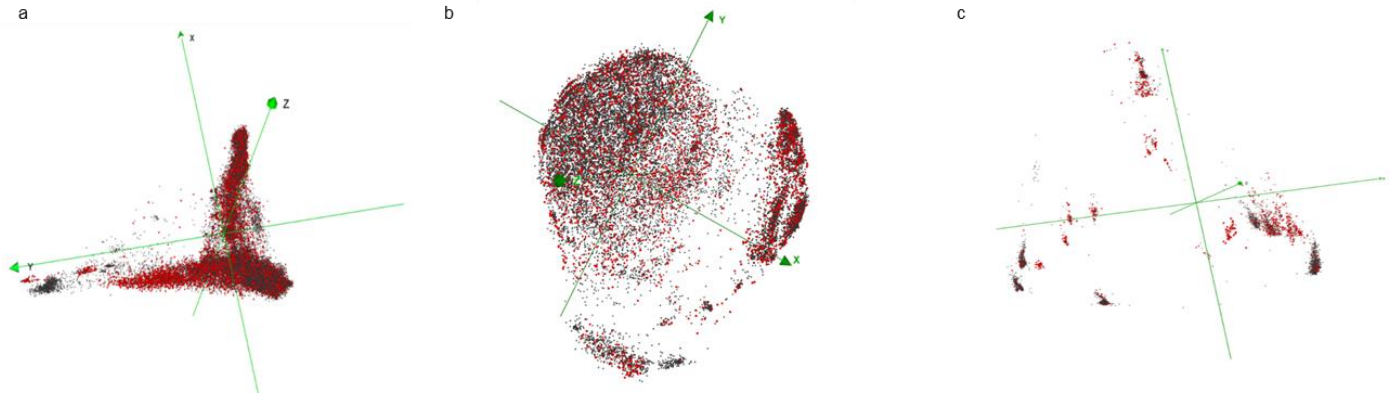

**Supplementary Figure 32. Core subset of hexaploid, tetraploid and CWR.**

Core sub set representing 20% of the population of hexaploid, tetraploids and CWR accessions. The same data points as in Figure 1 are shown. Samples are colored red if they are part of the core set, all other samples are shown in gray. a) core subset of 11,235 domesticated hexaploid accessions, b) core reference set of 3,762 domesticated tetraploid accessions, c) core reference set of 748 CWR accessions.

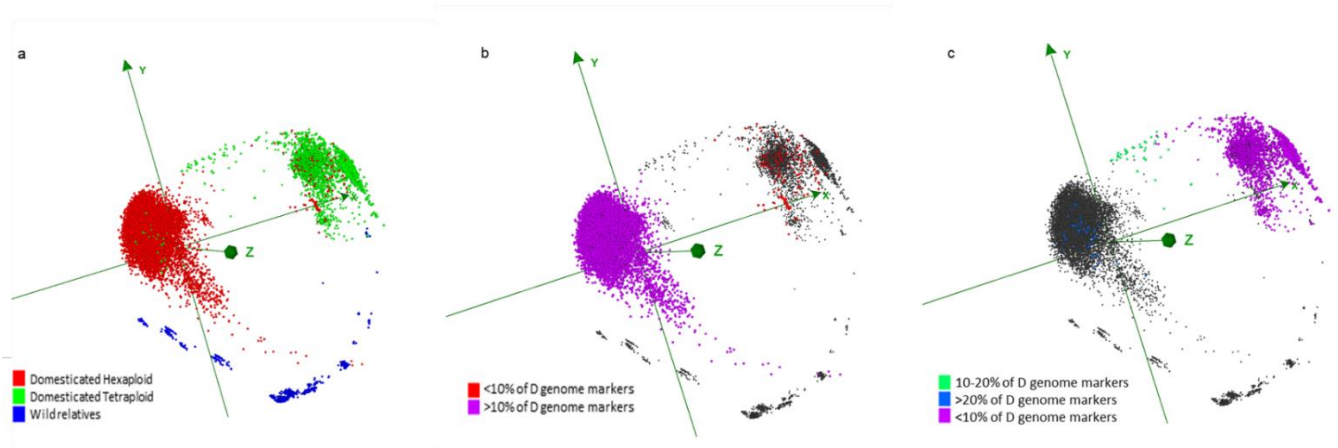

**Supplementary Figure 33. Representation of the global diversity and outliers.**

Multidimensional scaling representation of the global diversity analysis combining the three core subset using 41,717 SilicoDArT markers. a) 746 samples of Wilds in blue, 3,157 samples of tetraploids in green and 11,235 samples of hexaploids in red; b) MDS plot showing the hexaploids samples in purple and 2.12% of the samples in red with potential miss-classification in their passport data which contain <10% of D genome markers (outliers); c) tetraploid samples in purple and 4.37% of potential miss-classification in their passport information with 10 to 20% (green) and >20% (blue) of D genome markers (outliers).

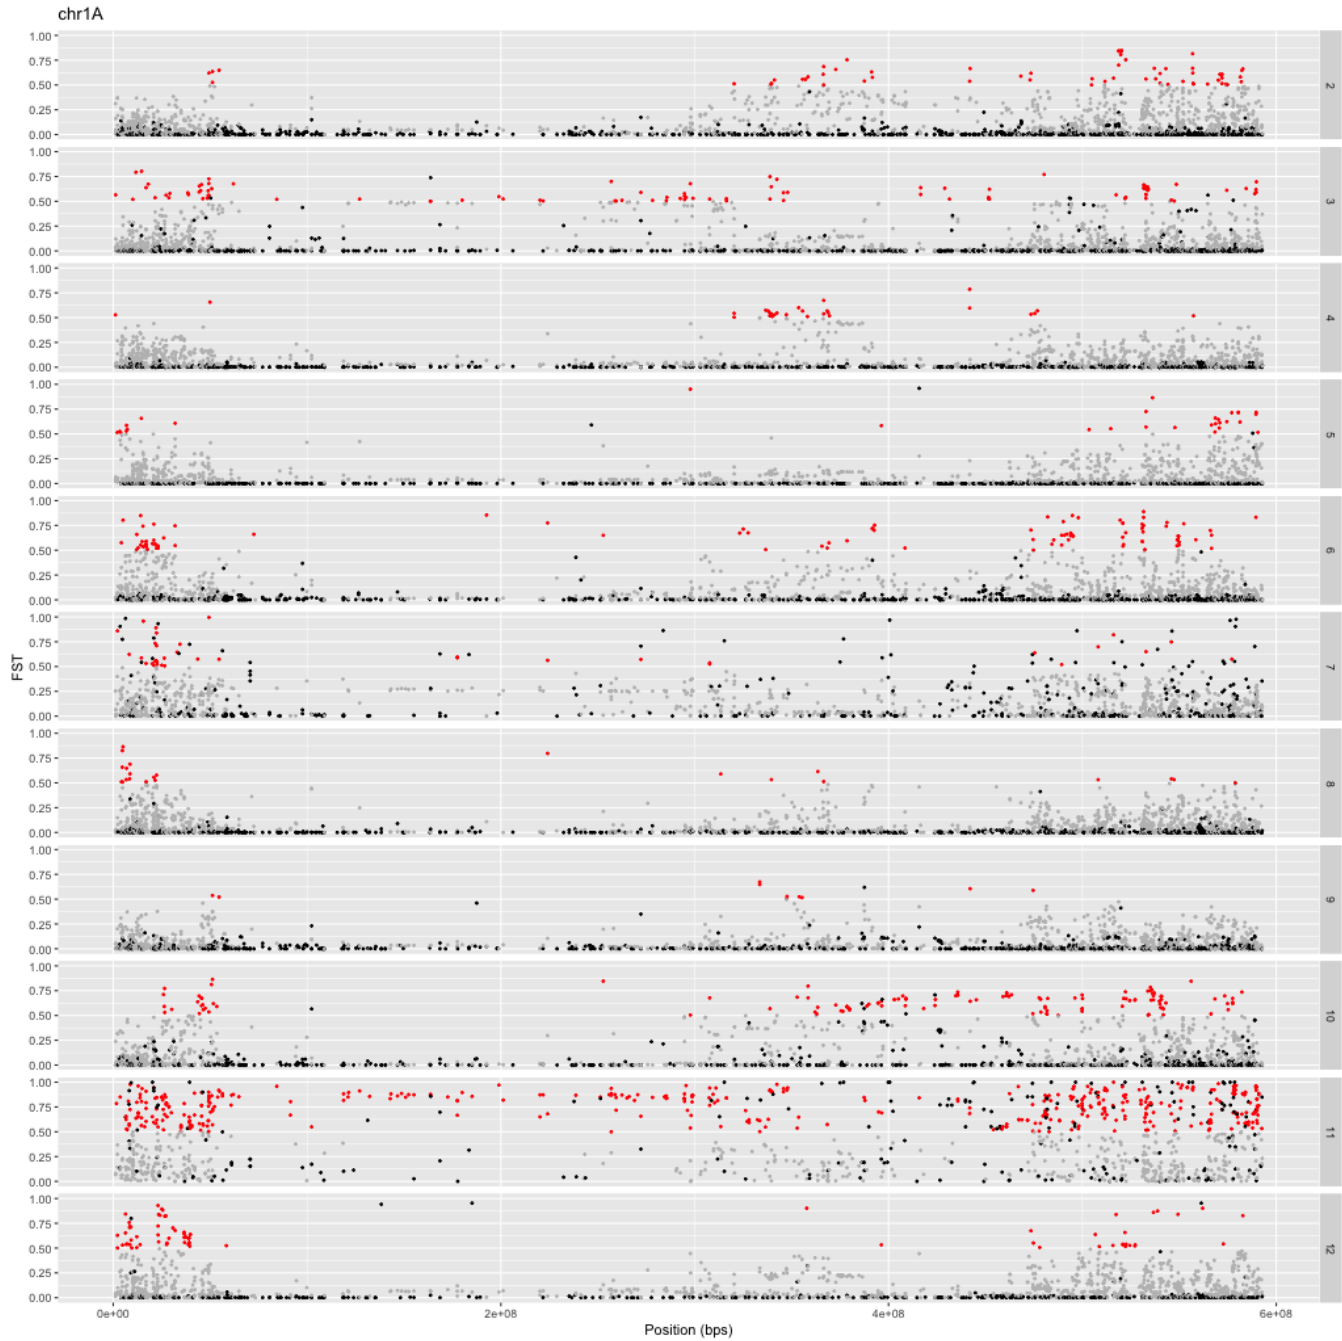

**Supplementary Figure 34. Diversity patterns per cluster division in hexaploid.**

Analysis of  $F_{st}$  values on a variant per variant basis on chromosome 1A across the 12 clusters divisions.

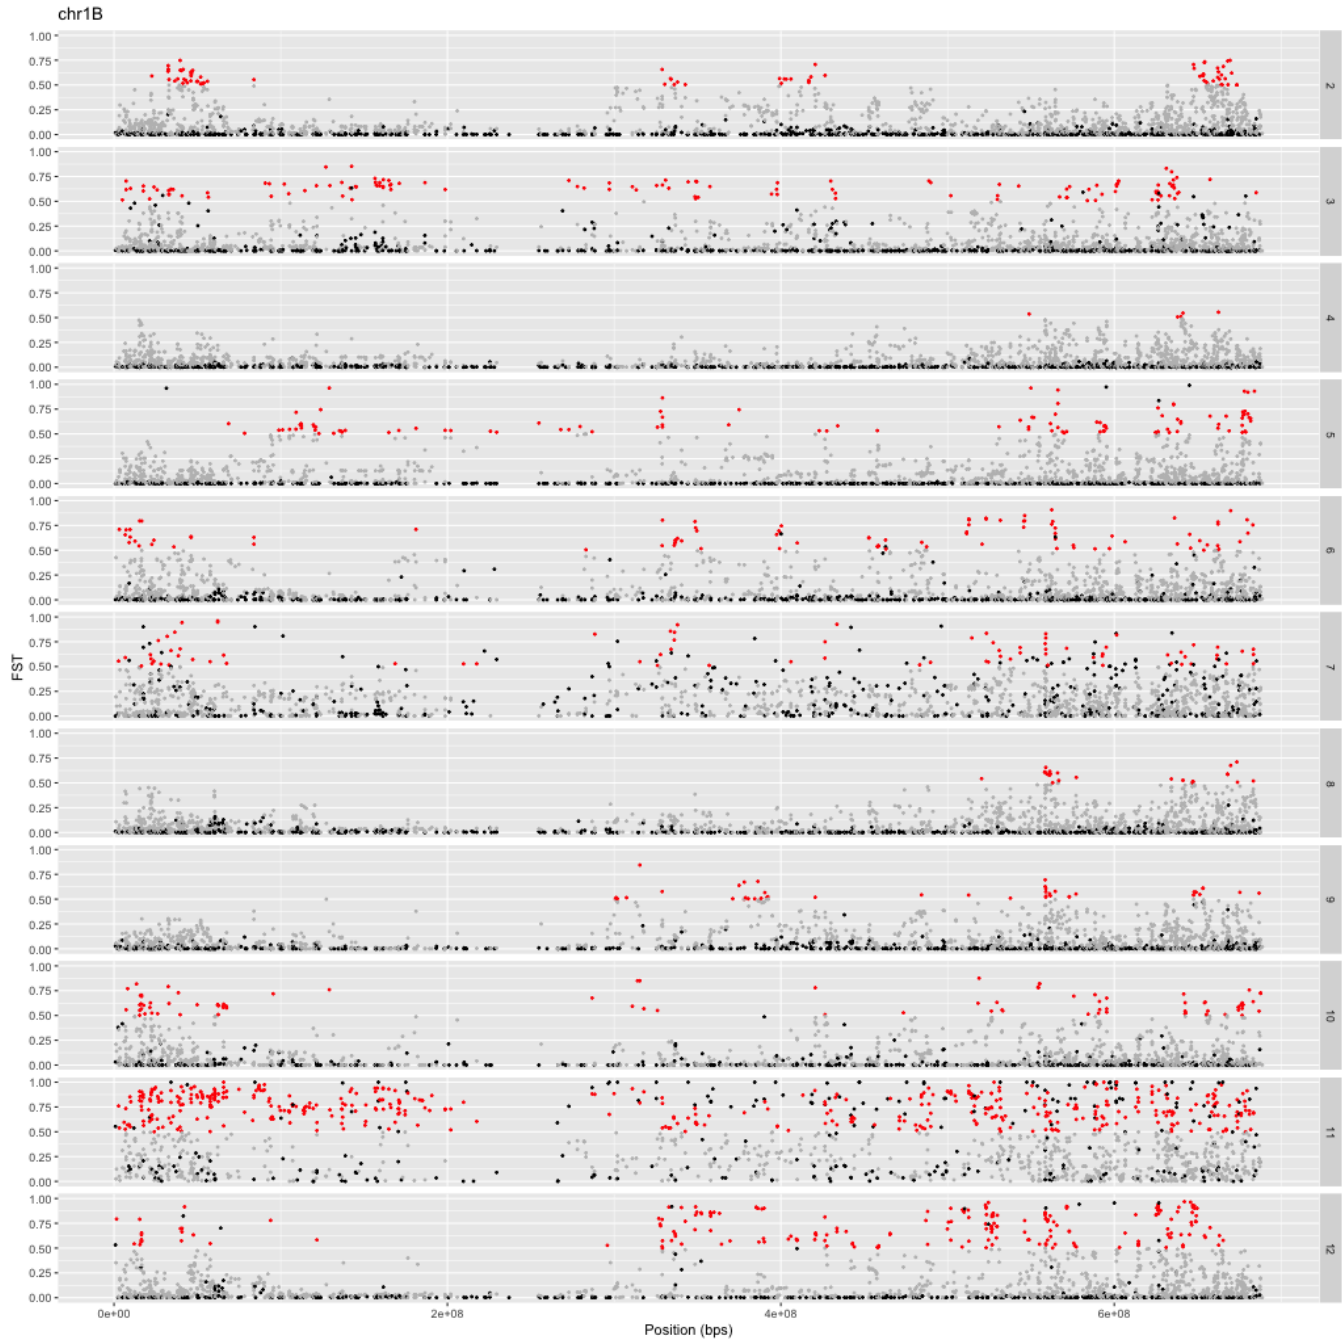

**Supplementary Figure 35. Diversity patterns per cluster division in hexaploid.**

Analysis of  $F_{st}$  values on a variant per variant basis on chromosome 1B across the 12 clusters divisions.

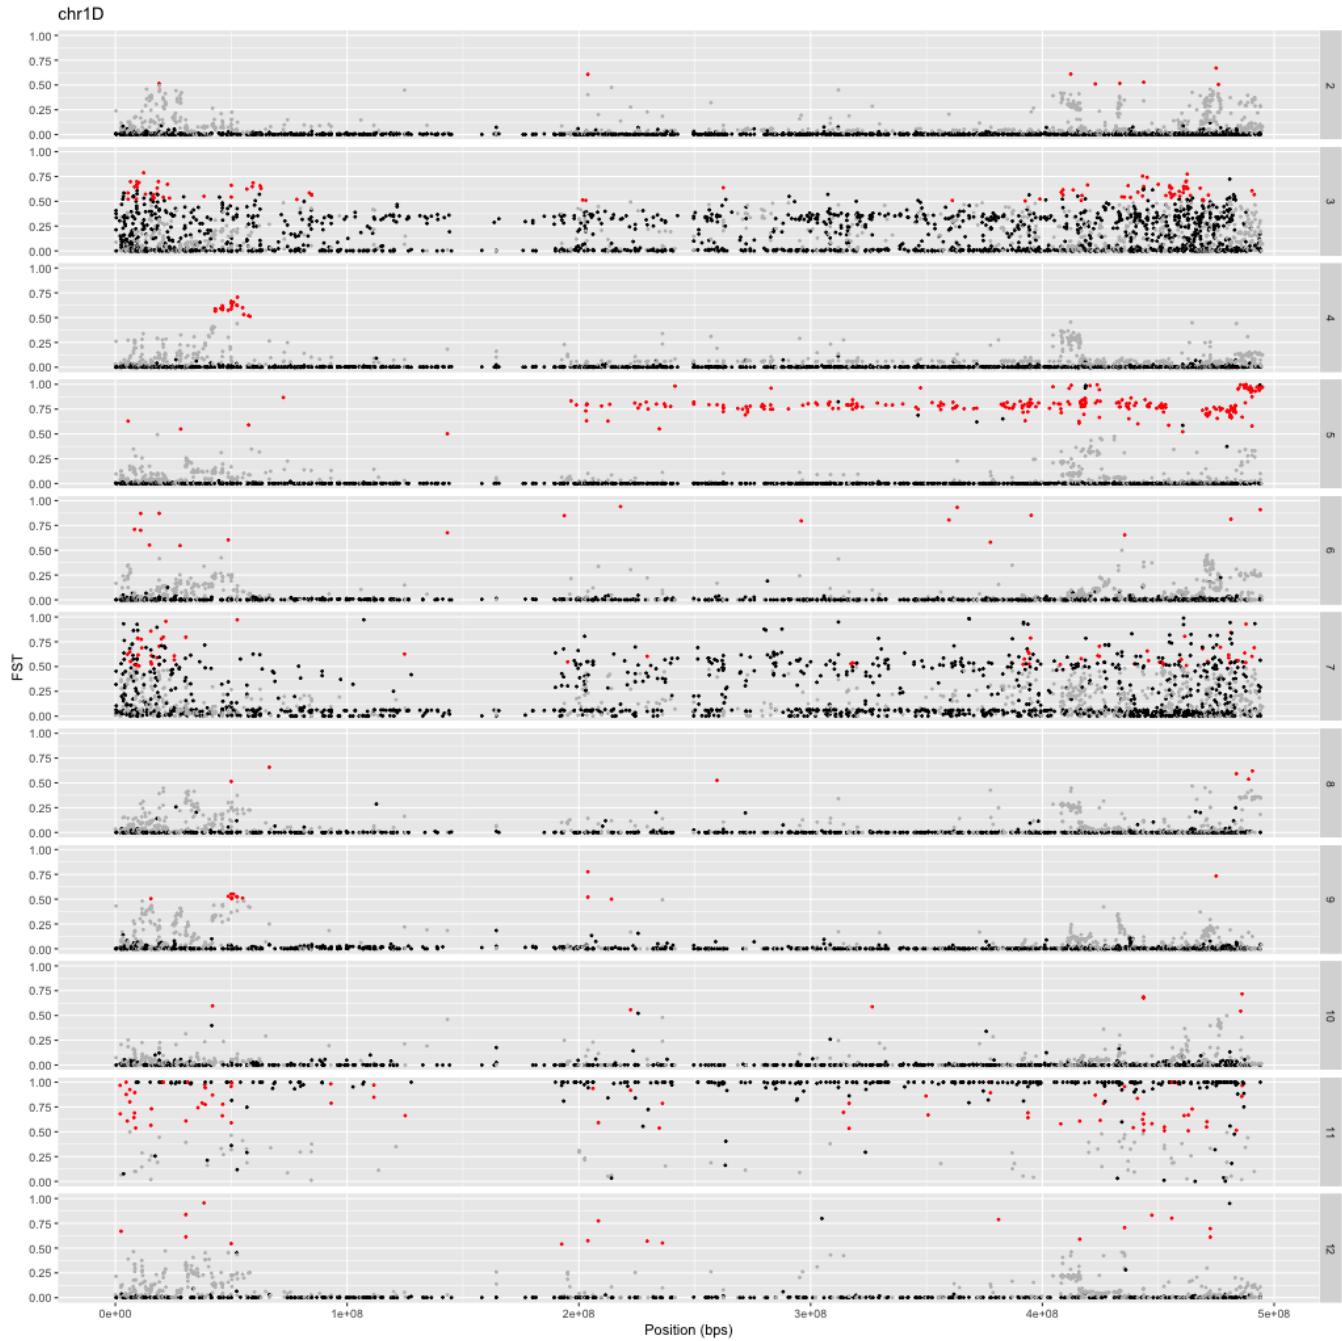

**Supplementary Figure 36. Diversity patterns per cluster division in hexaploid.**

Analysis of  $F_{st}$  values on a variant per variant basis on chromosome 1D across the 12 clusters divisions.



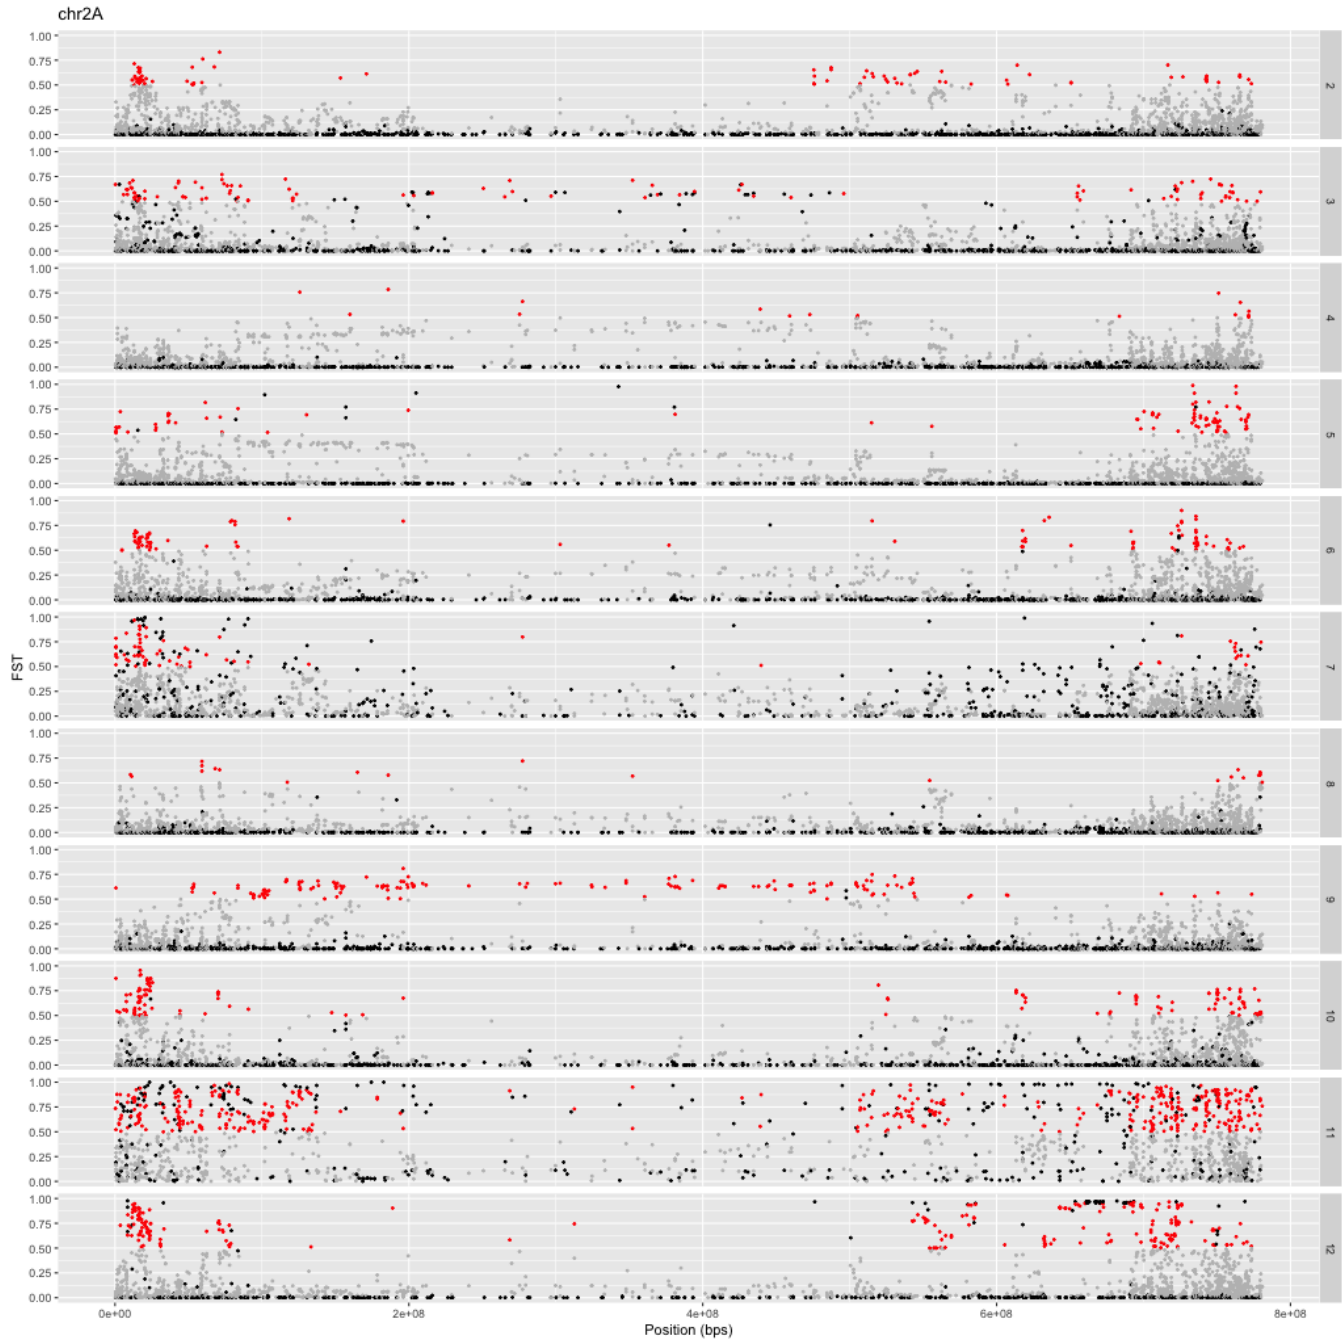

**Supplementary Figure 37. Diversity patterns per cluster division in hexaploid.**

Analysis of  $F_{st}$  values on a variant per variant basis on chromosome 2A across the 12 clusters divisions.

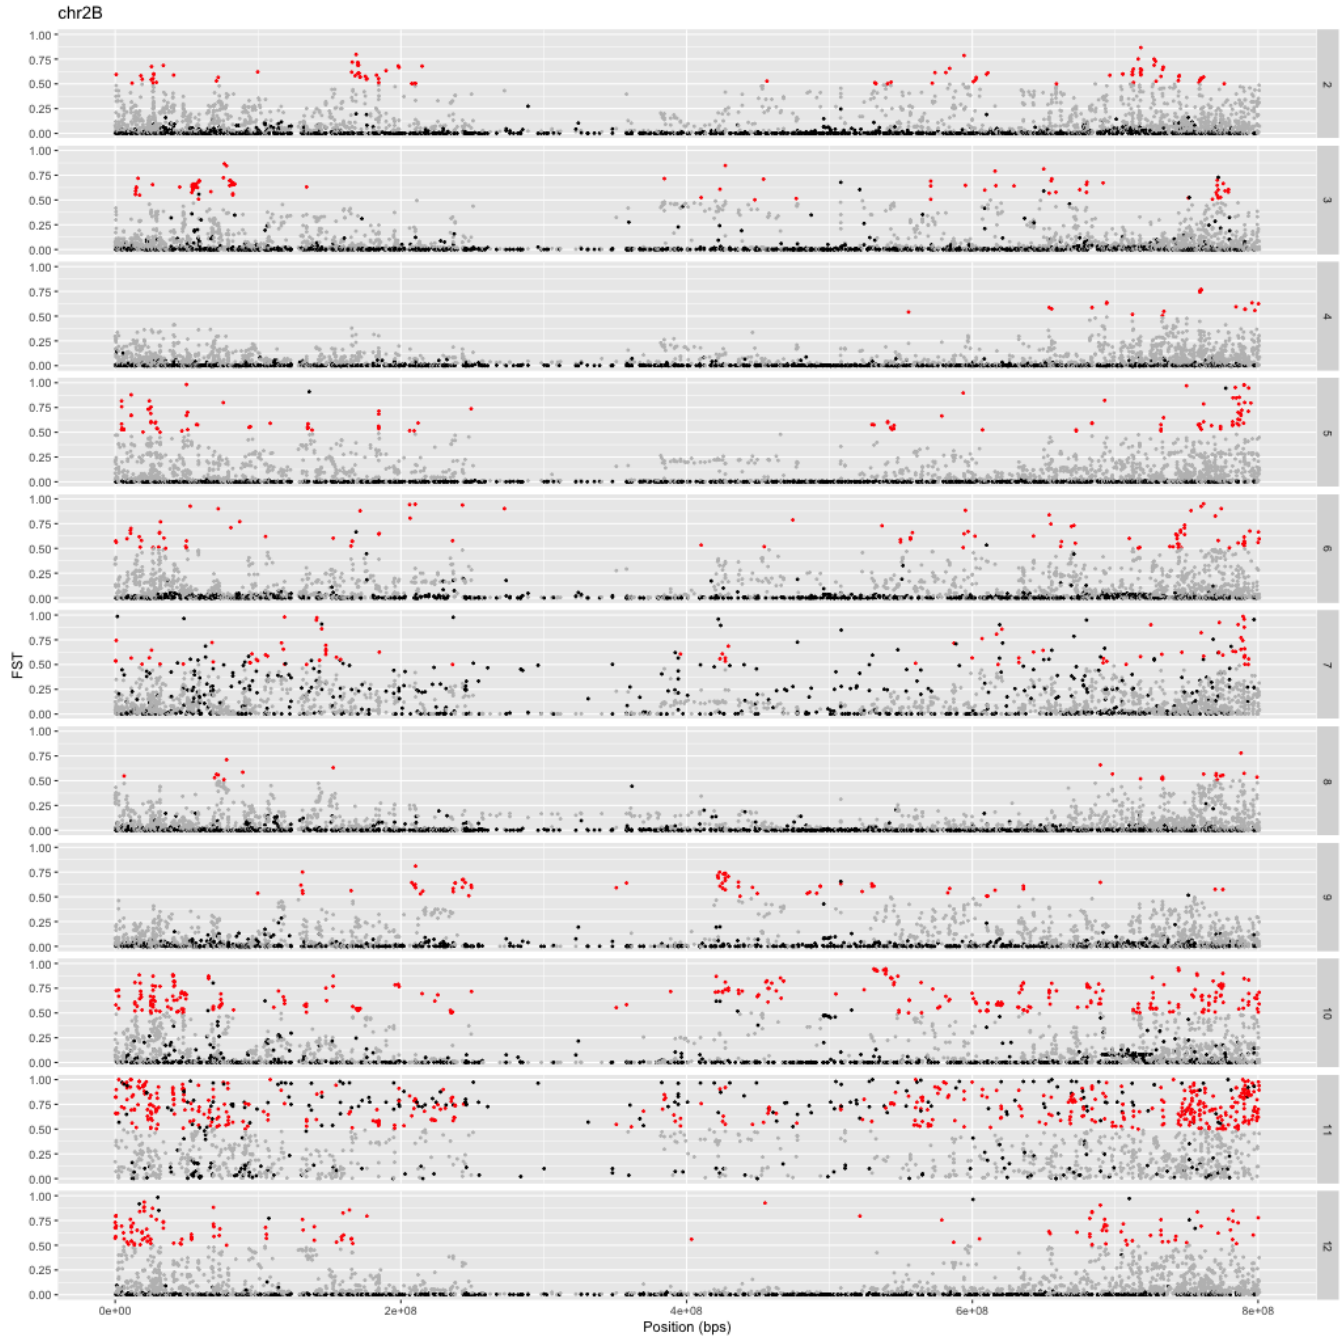

**Supplementary Figure 38. Diversity patterns per cluster division in hexaploid.**

Analysis of Fst values on a variant per variant basis on chromosome 2B across the 12 clusters divisions.

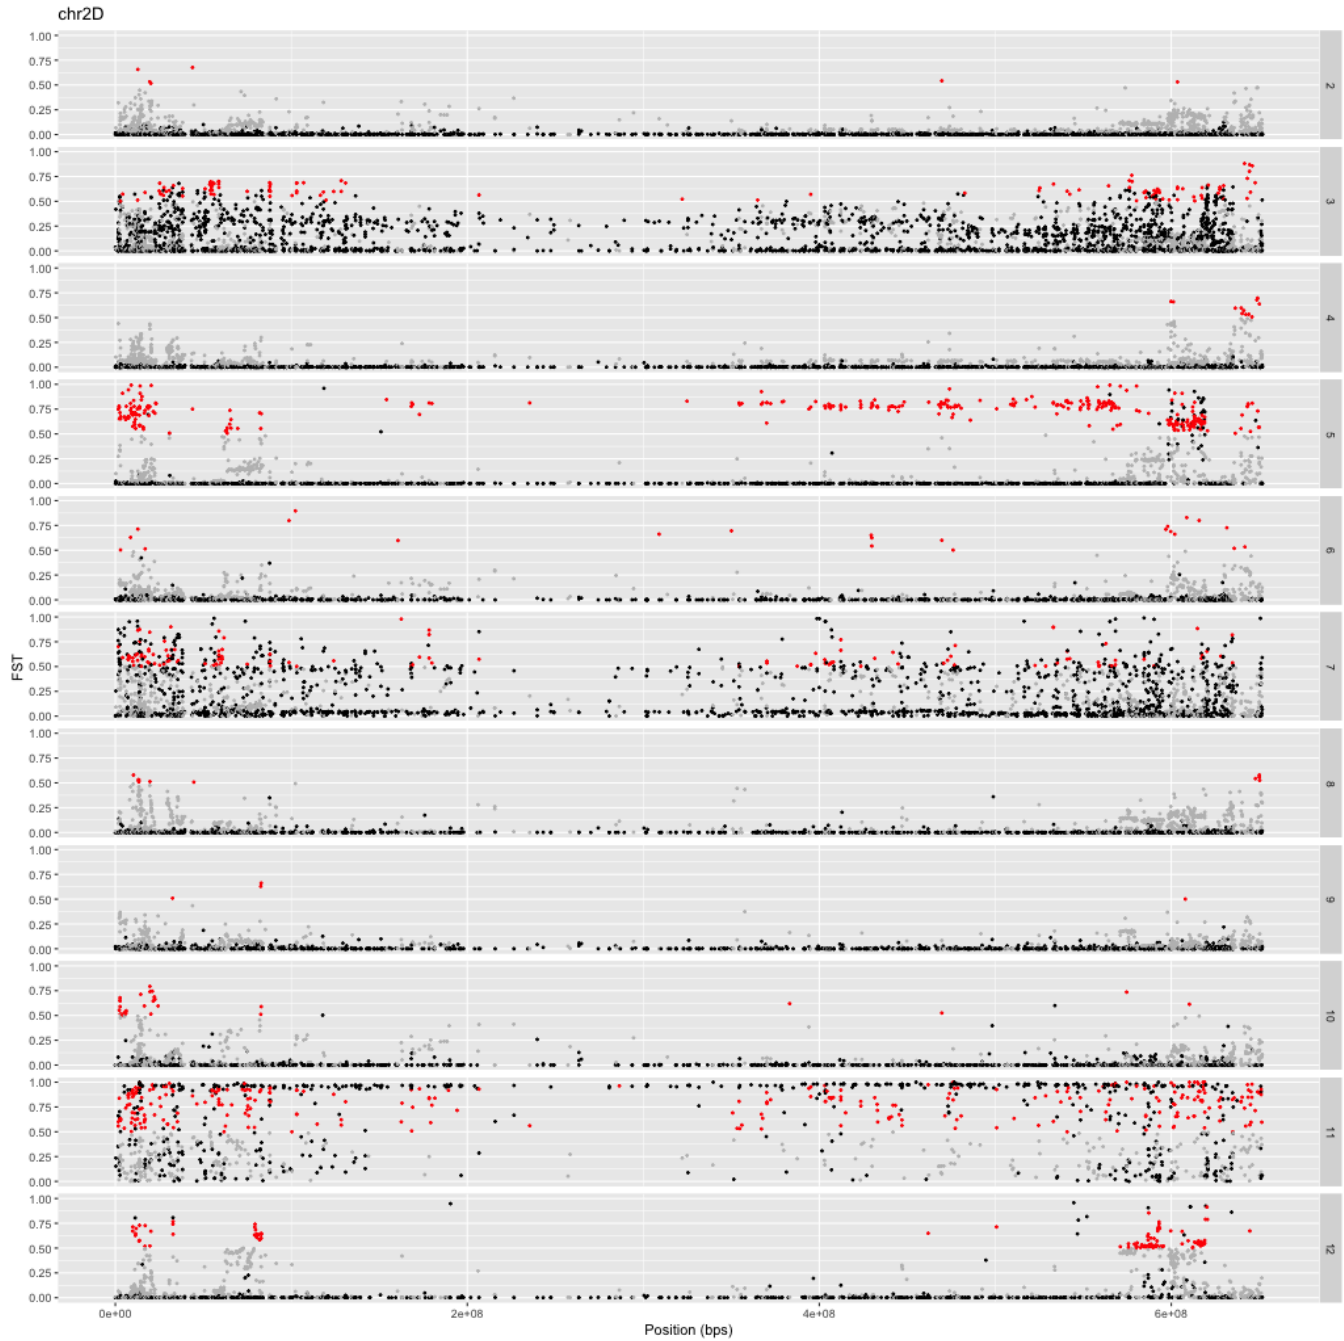

**Supplementary Figure 39. Diversity patterns per cluster division in hexaploid.**

Analysis of Fst values on a variant per variant basis on chromosome 2D across the 12 clusters divisions.

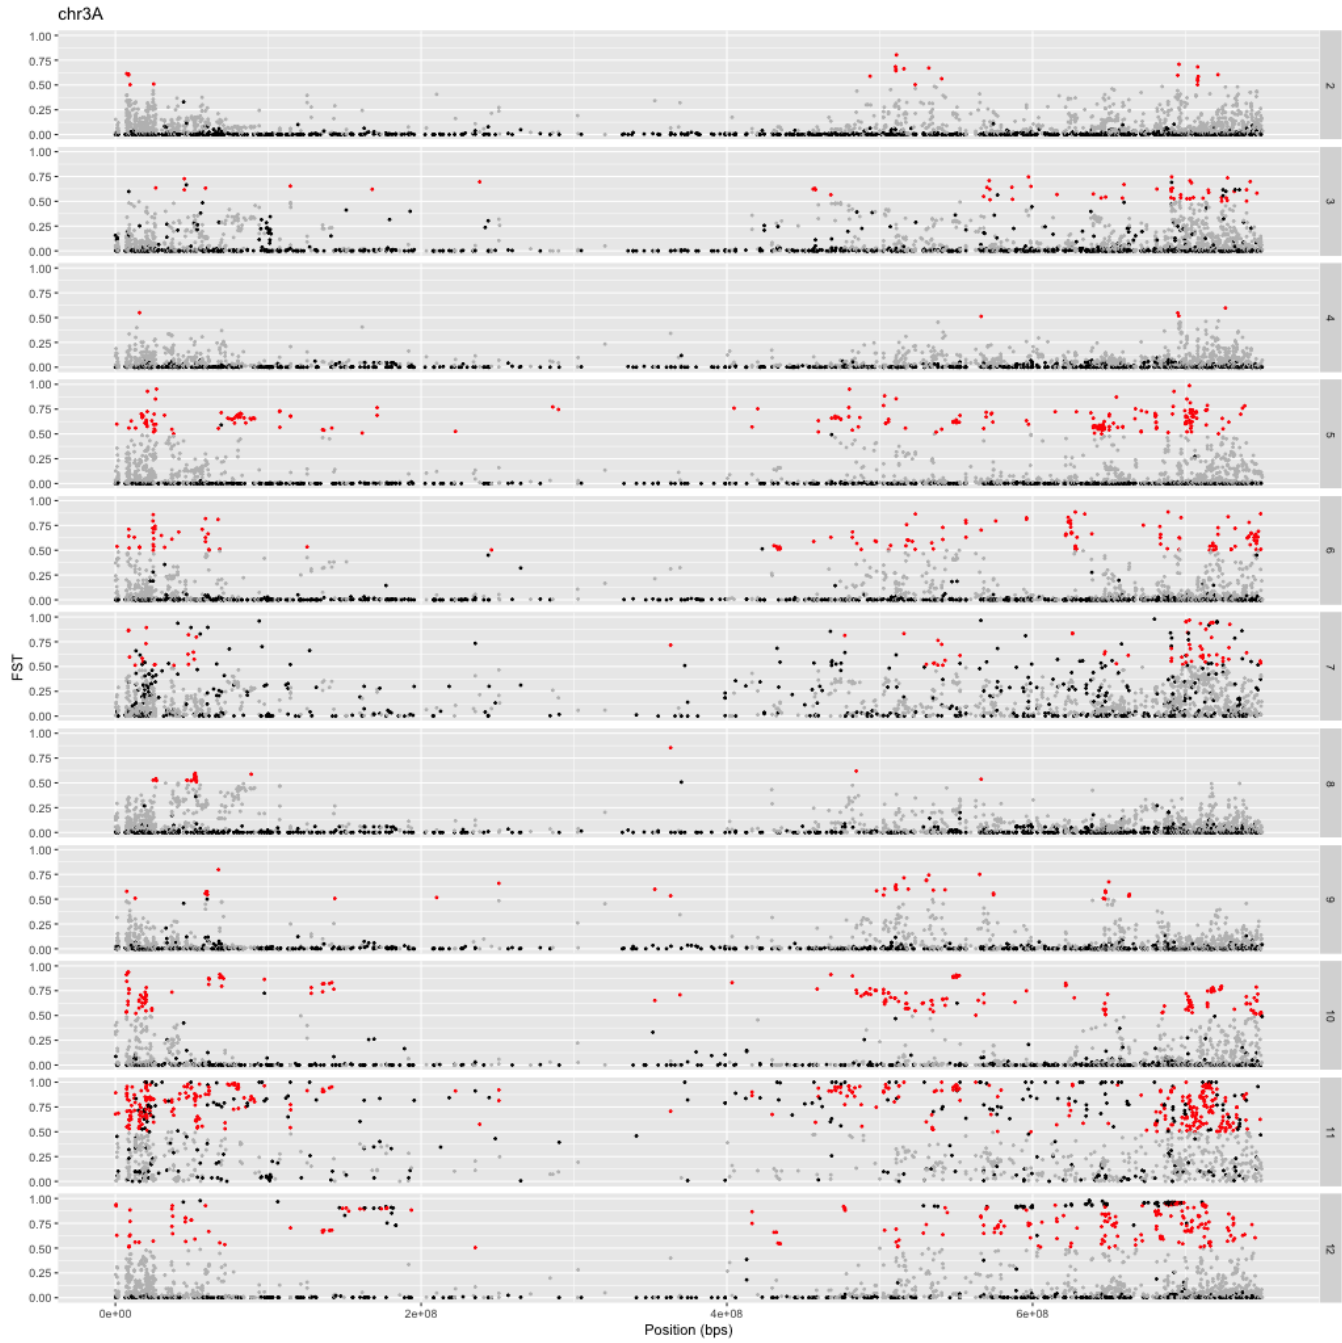

**Supplementary Figure 40. Diversity patterns per cluster division in hexaploid.**

Analysis of  $F_{st}$  values on a variant per variant basis on chromosome 3A across the 12 clusters divisions.

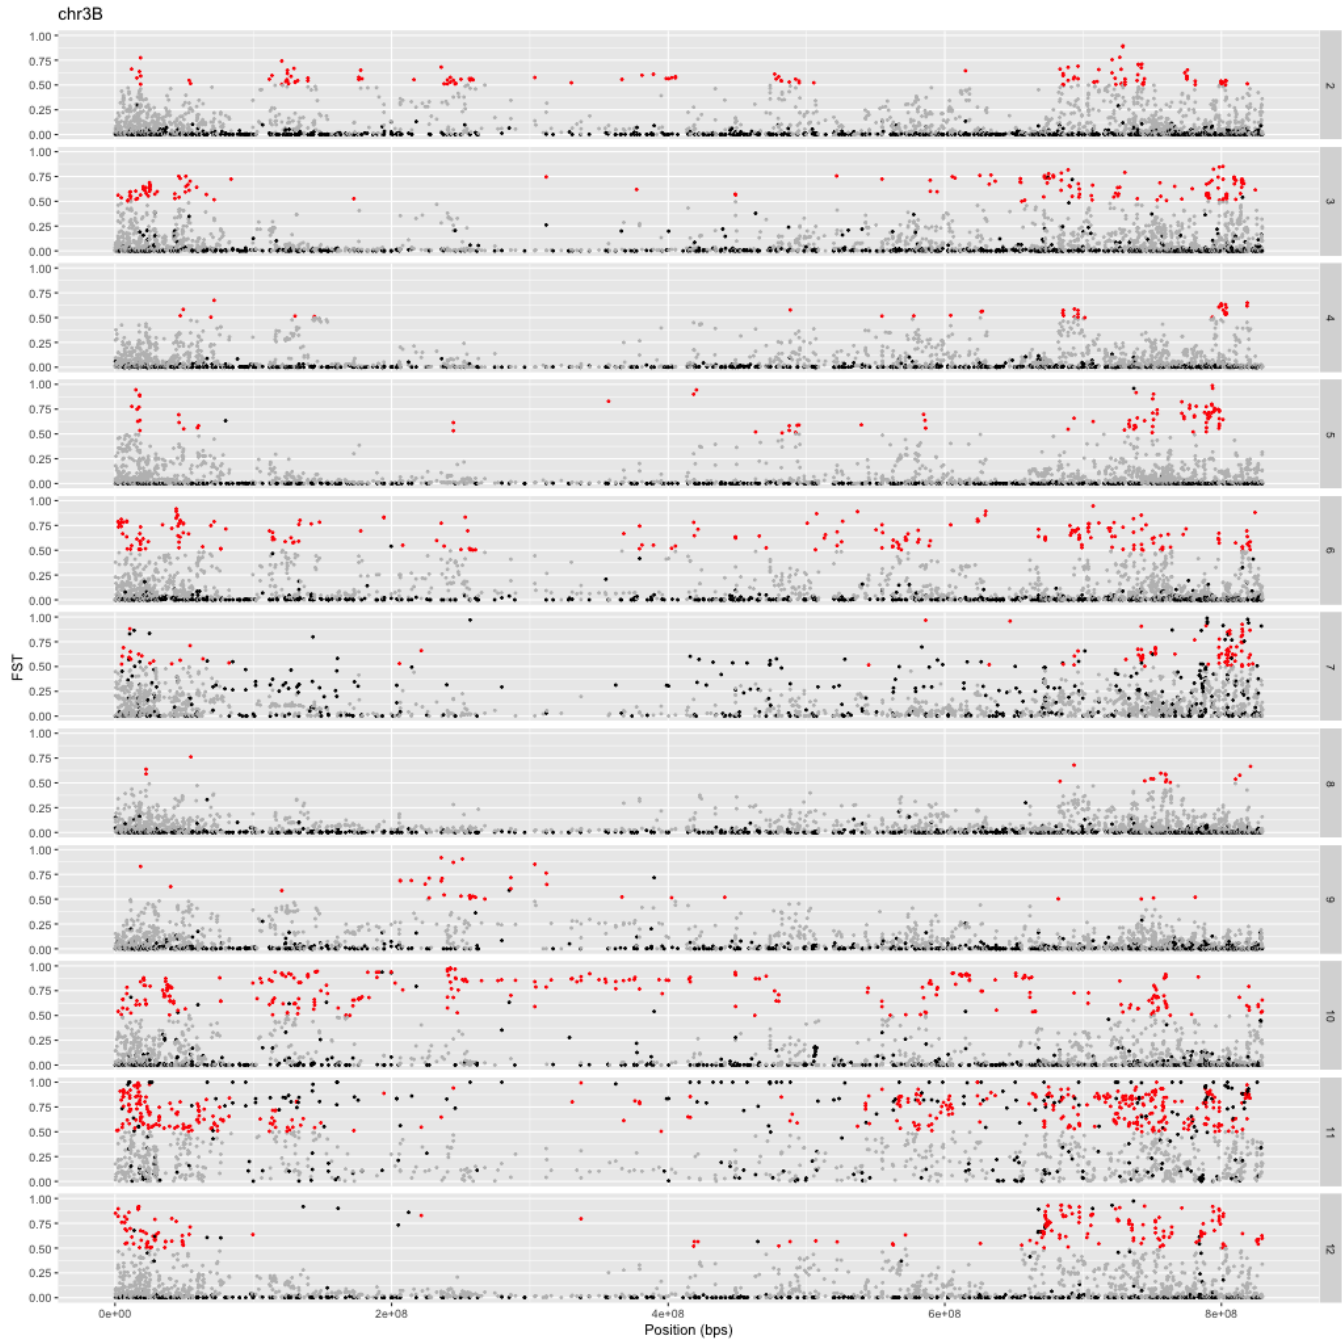

**Supplementary Figure 41. Diversity patterns per cluster division in hexaploid.**

Analysis of  $F_{st}$  values on a variant per variant basis on chromosome 3B across the 12 clusters divisions.



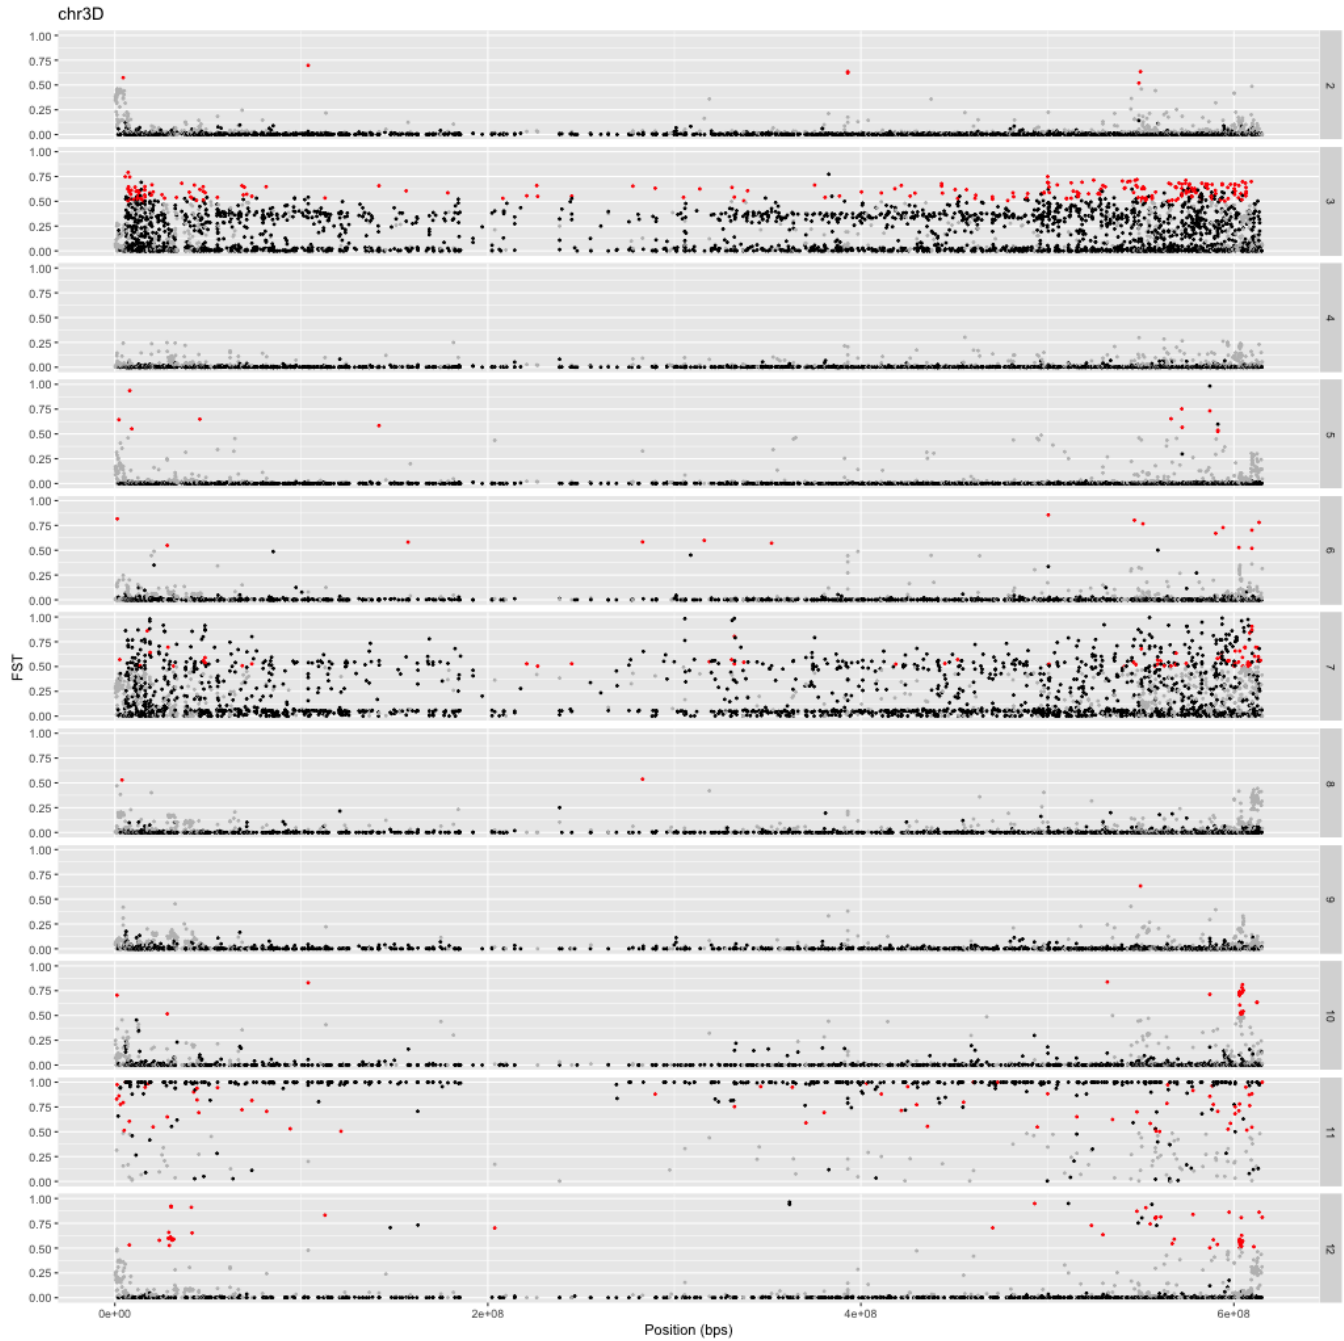

**Supplementary Figure 42. Diversity patterns per cluster division in hexaploid.**

Analysis of  $F_{st}$  values on a variant per variant basis on chromosome 3D across the 12 clusters divisions.



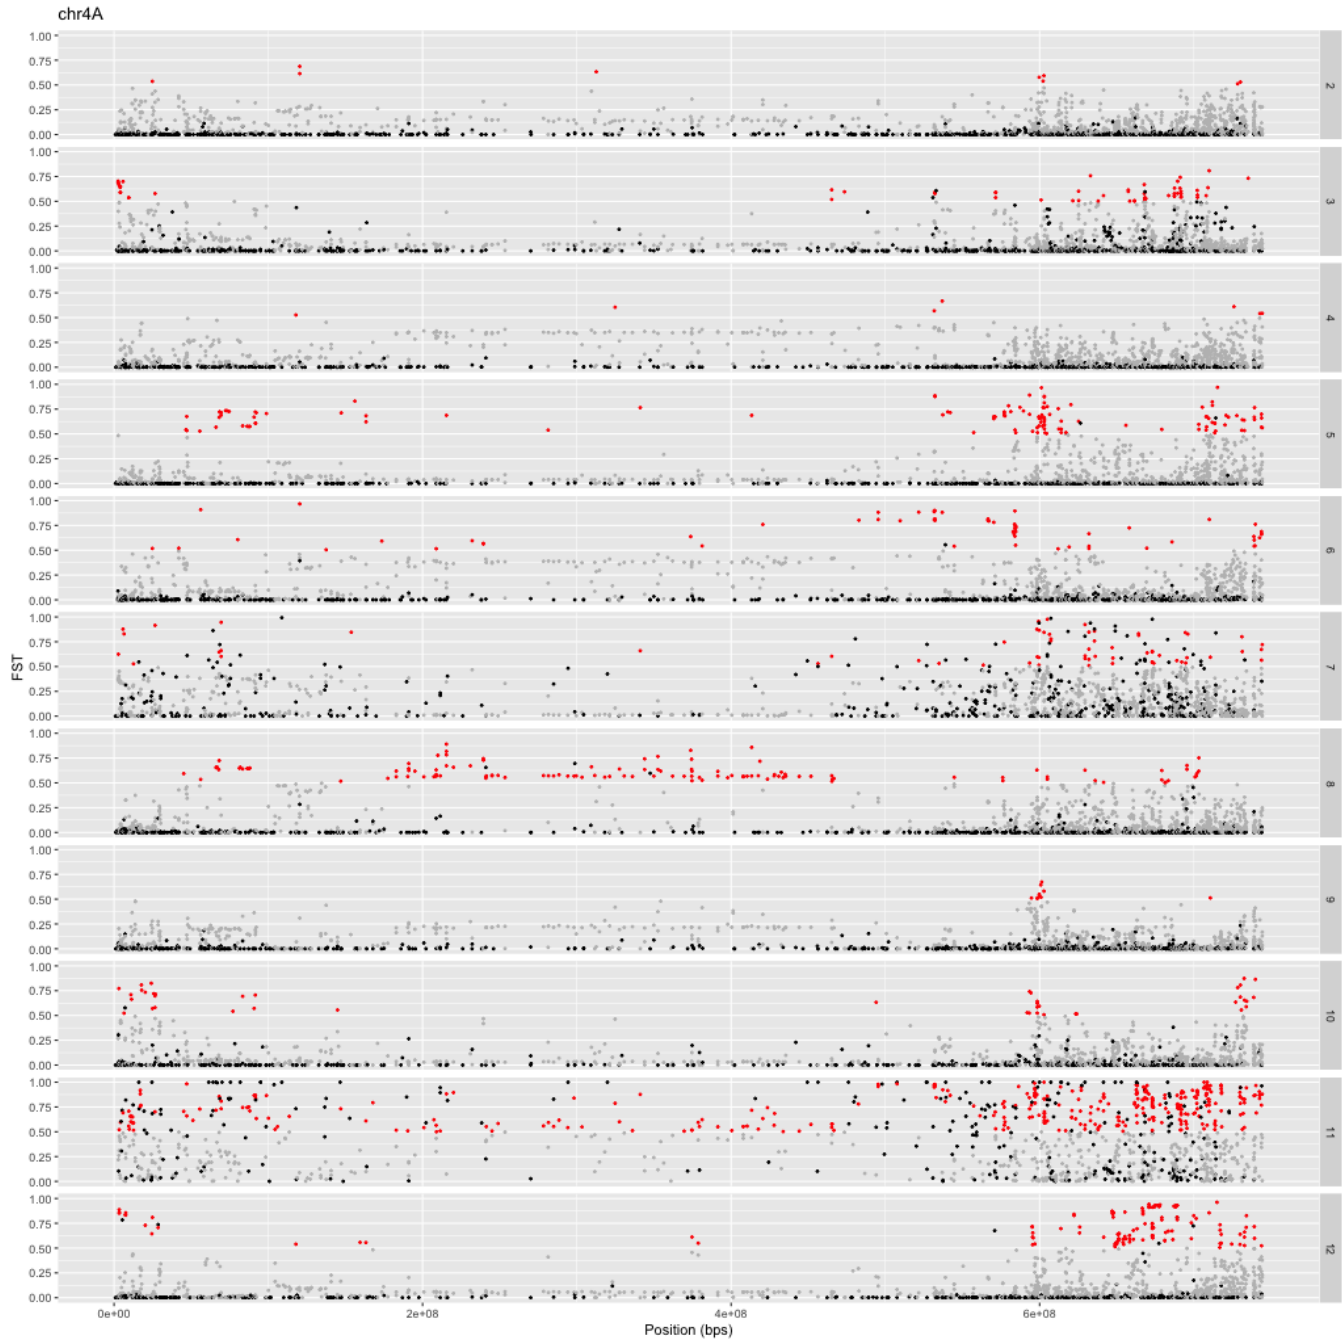

**Supplementary Figure 43. Diversity patterns per cluster division in hexaploid.**

Analysis of Fst values on a variant per variant basis on chromosome 4A across the 12 clusters divisions.

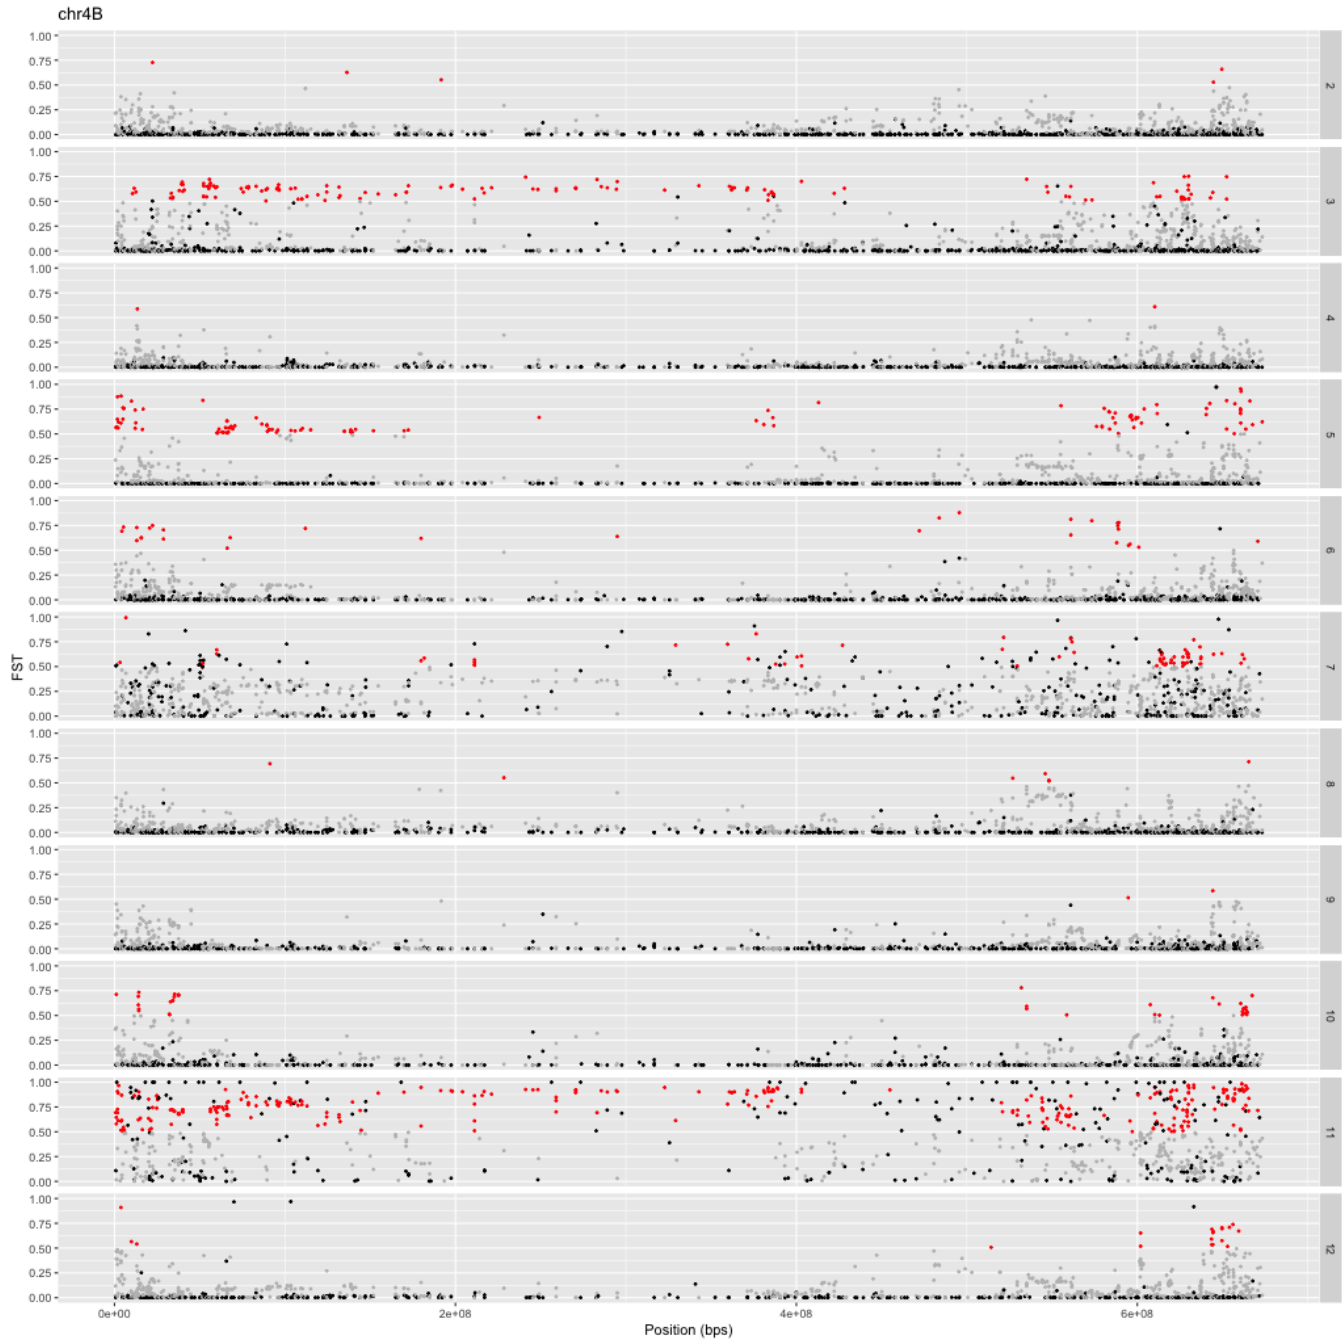

**Supplementary Figure 44. Diversity patterns per cluster division in hexaploid.**

Analysis of Fst values on a variant per variant basis on chromosome 4B across the 12 clusters divisions.

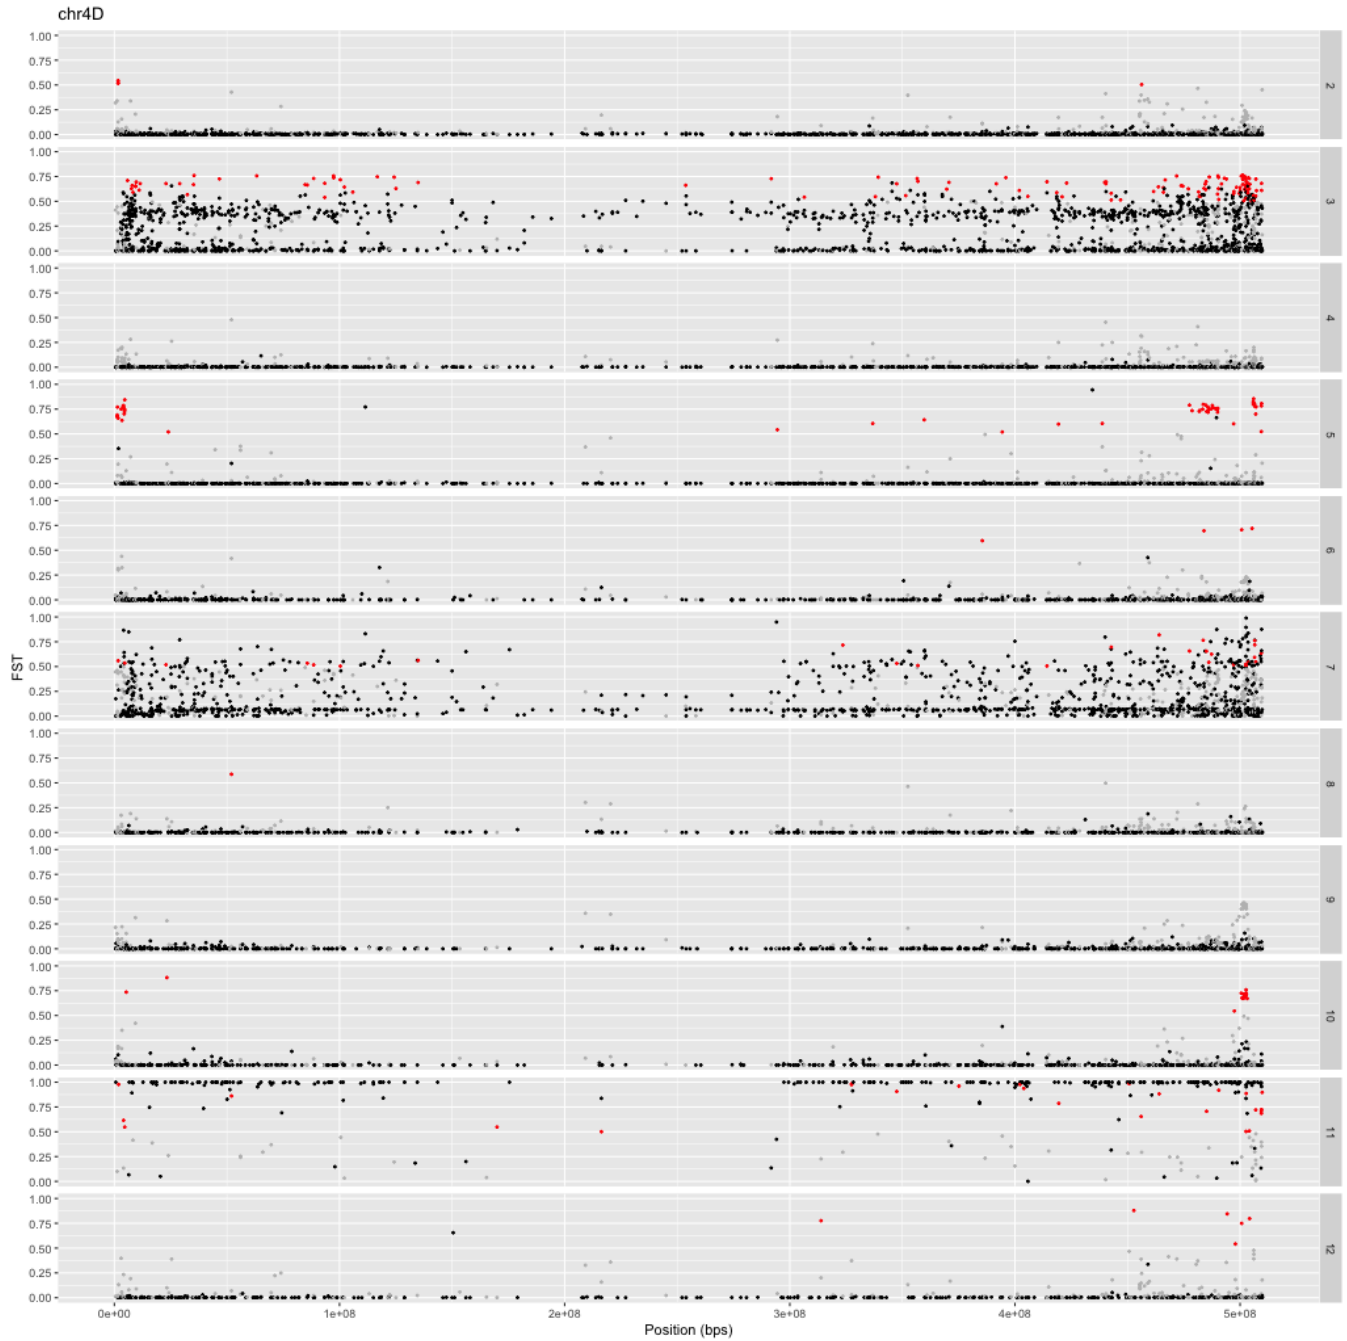

**Supplementary Figure 45. Diversity patterns per cluster division in hexaploid.**

Analysis of Fst values on a variant per variant basis on chromosome 4D across the 12 clusters divisions.

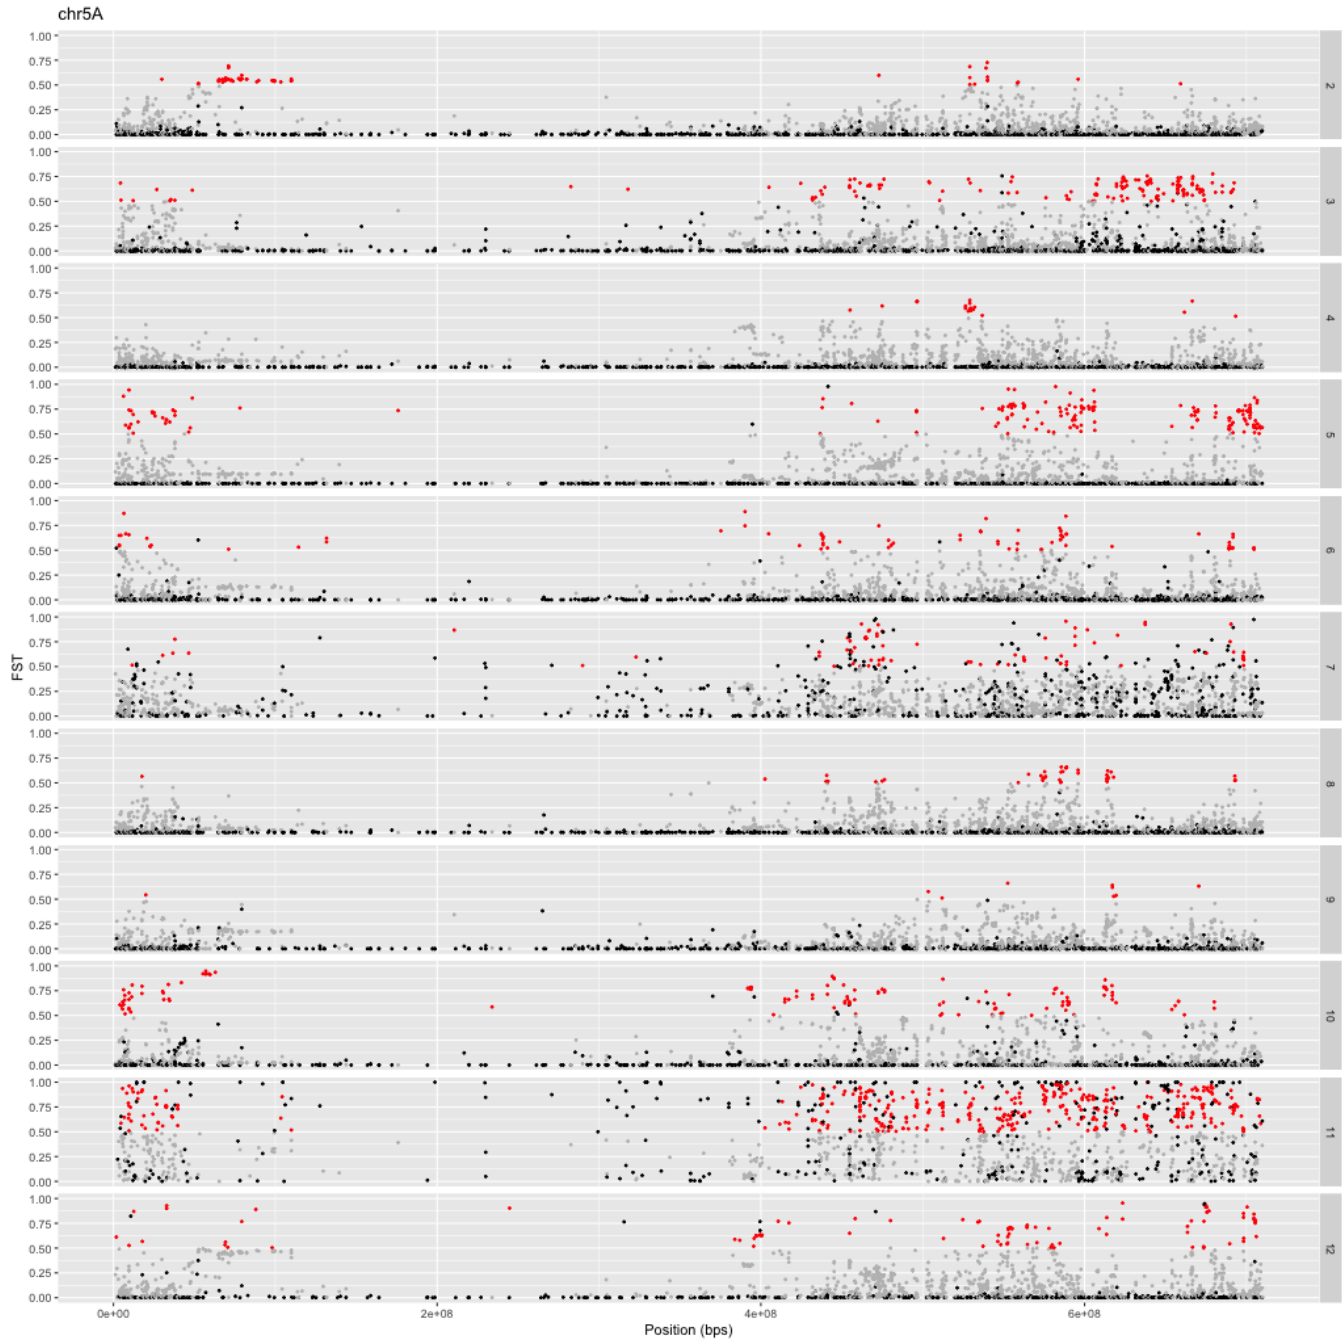

**Supplementary Figure 46. Diversity patterns per cluster division in hexaploid.**

Analysis of  $F_{st}$  values on a variant per variant basis on chromosome 5A across the 12 clusters divisions.

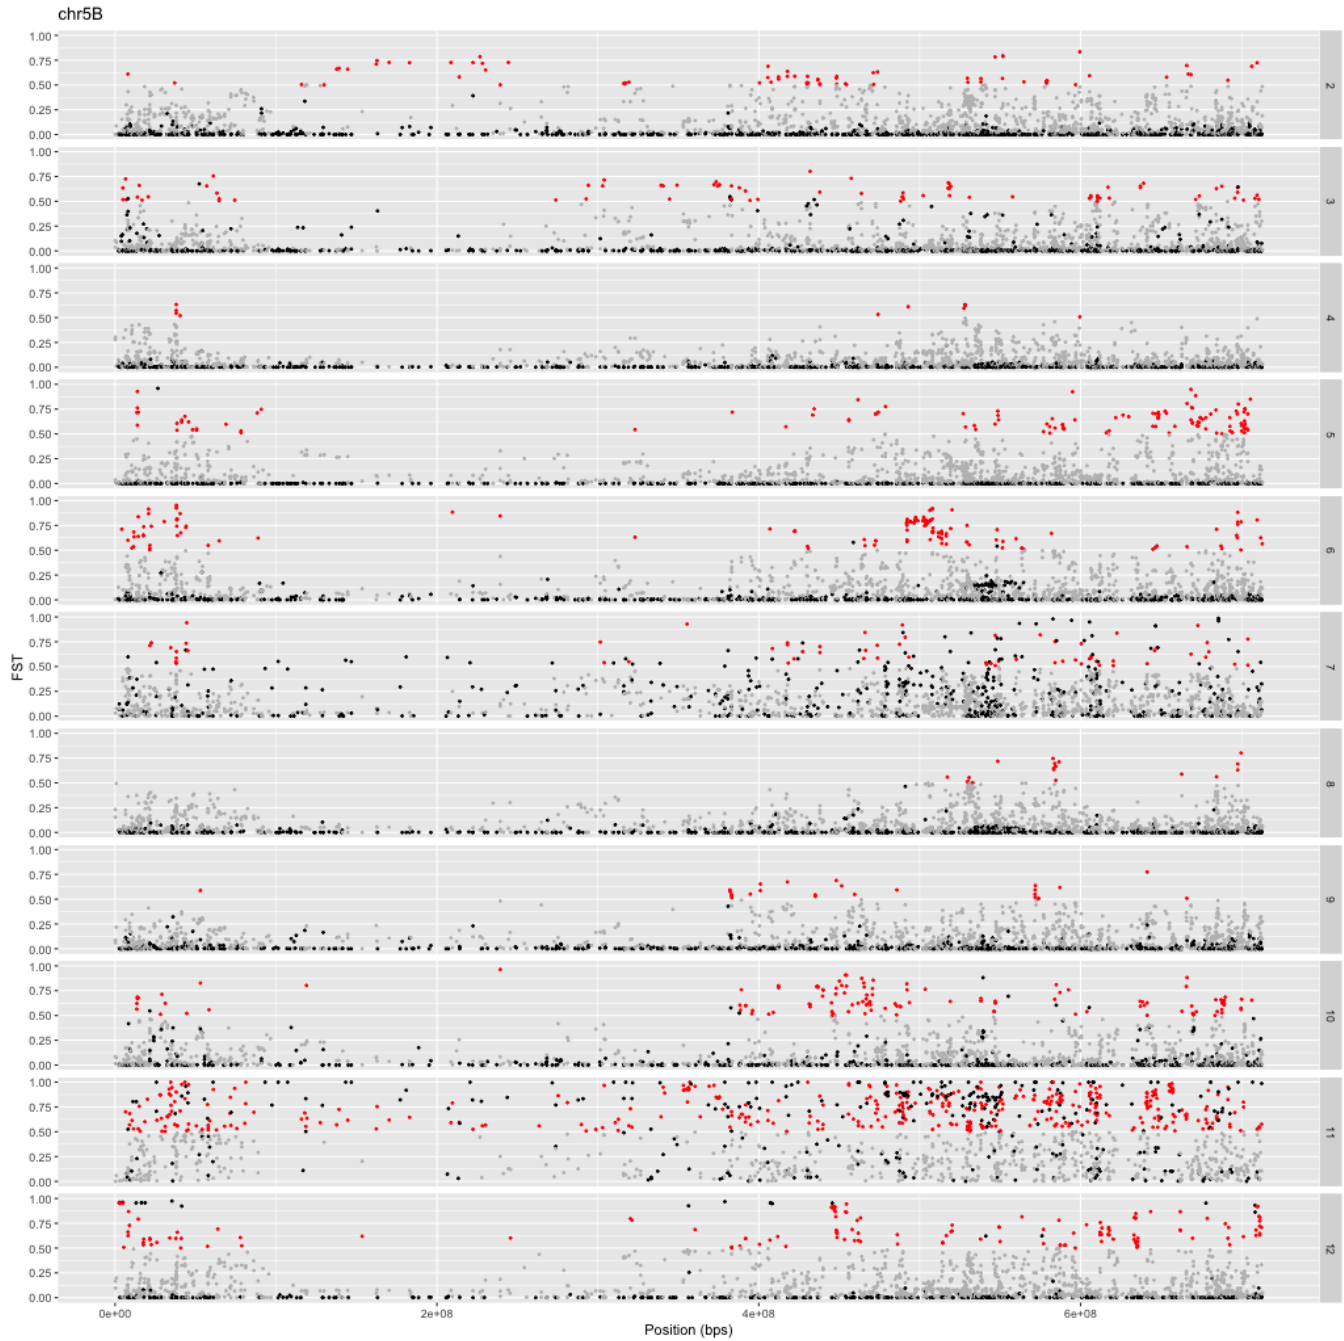

**Supplementary Figure 47. Diversity patterns per cluster division in hexaploid.**

Analysis of  $F_{st}$  values on a variant per variant basis on chromosome 5B across the 12 clusters divisions.

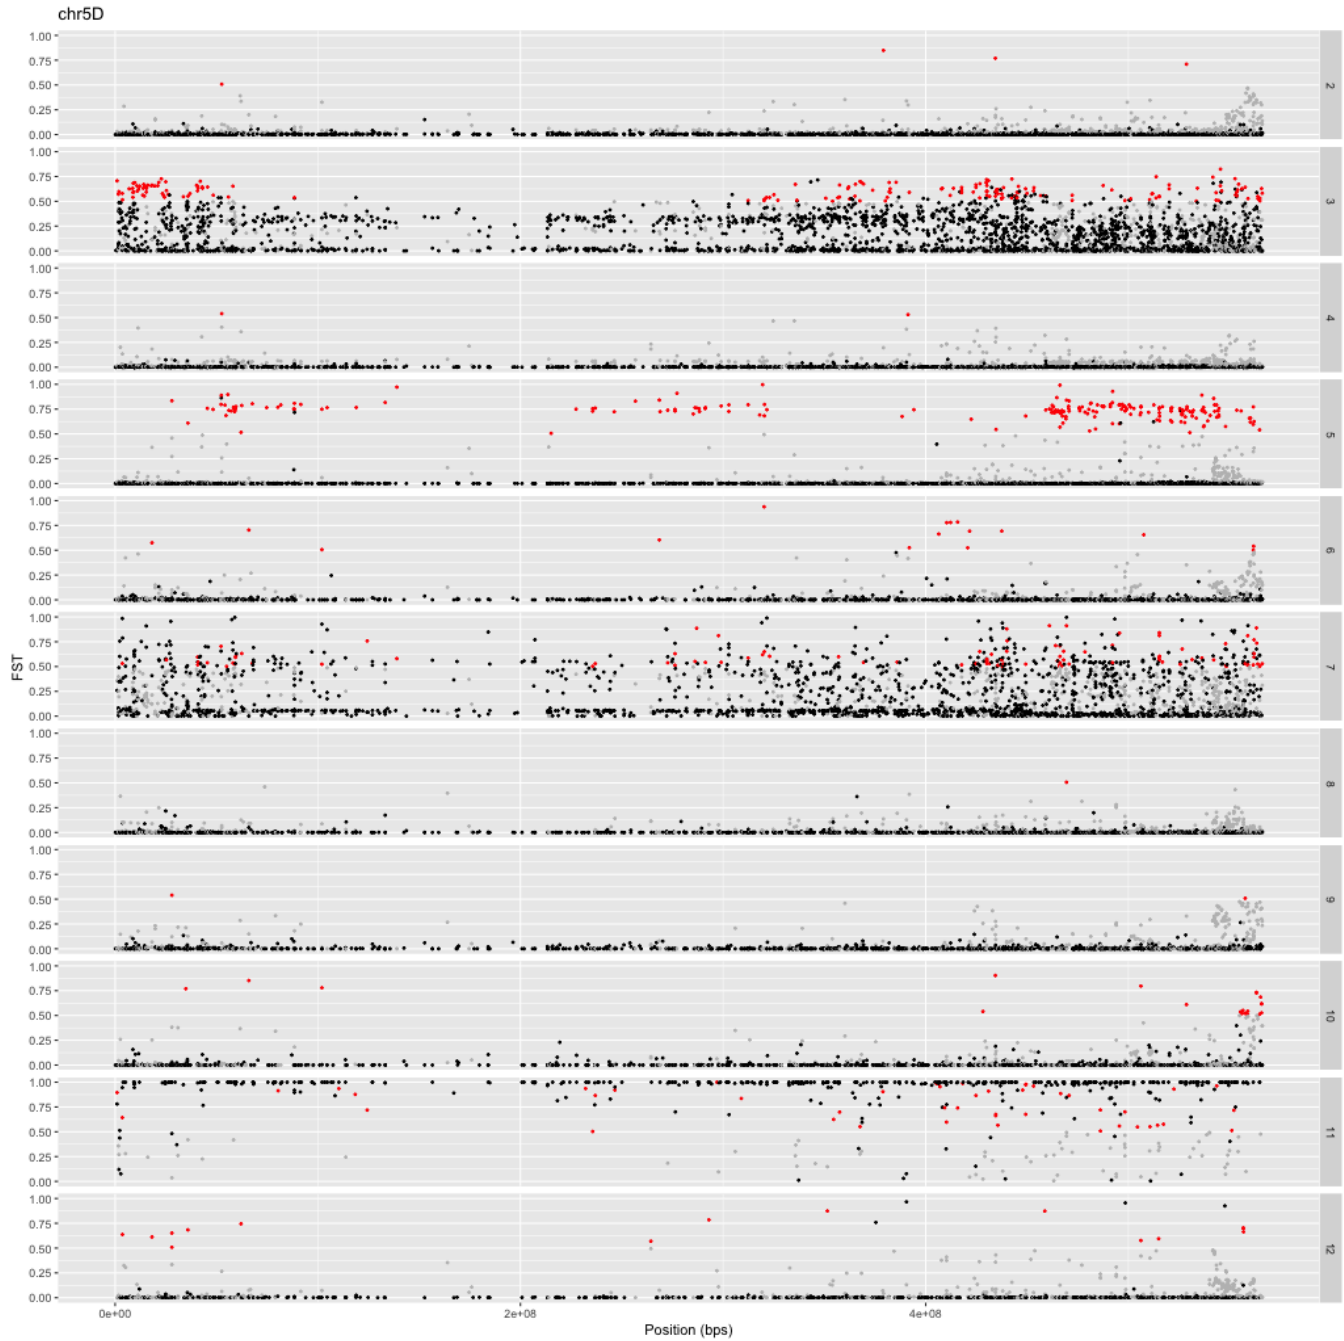

**Supplementary Figure 48. Diversity patterns per cluster division in hexaploid.**

Analysis of Fst values on a variant per variant basis on chromosome 5D across the 12 clusters divisions.



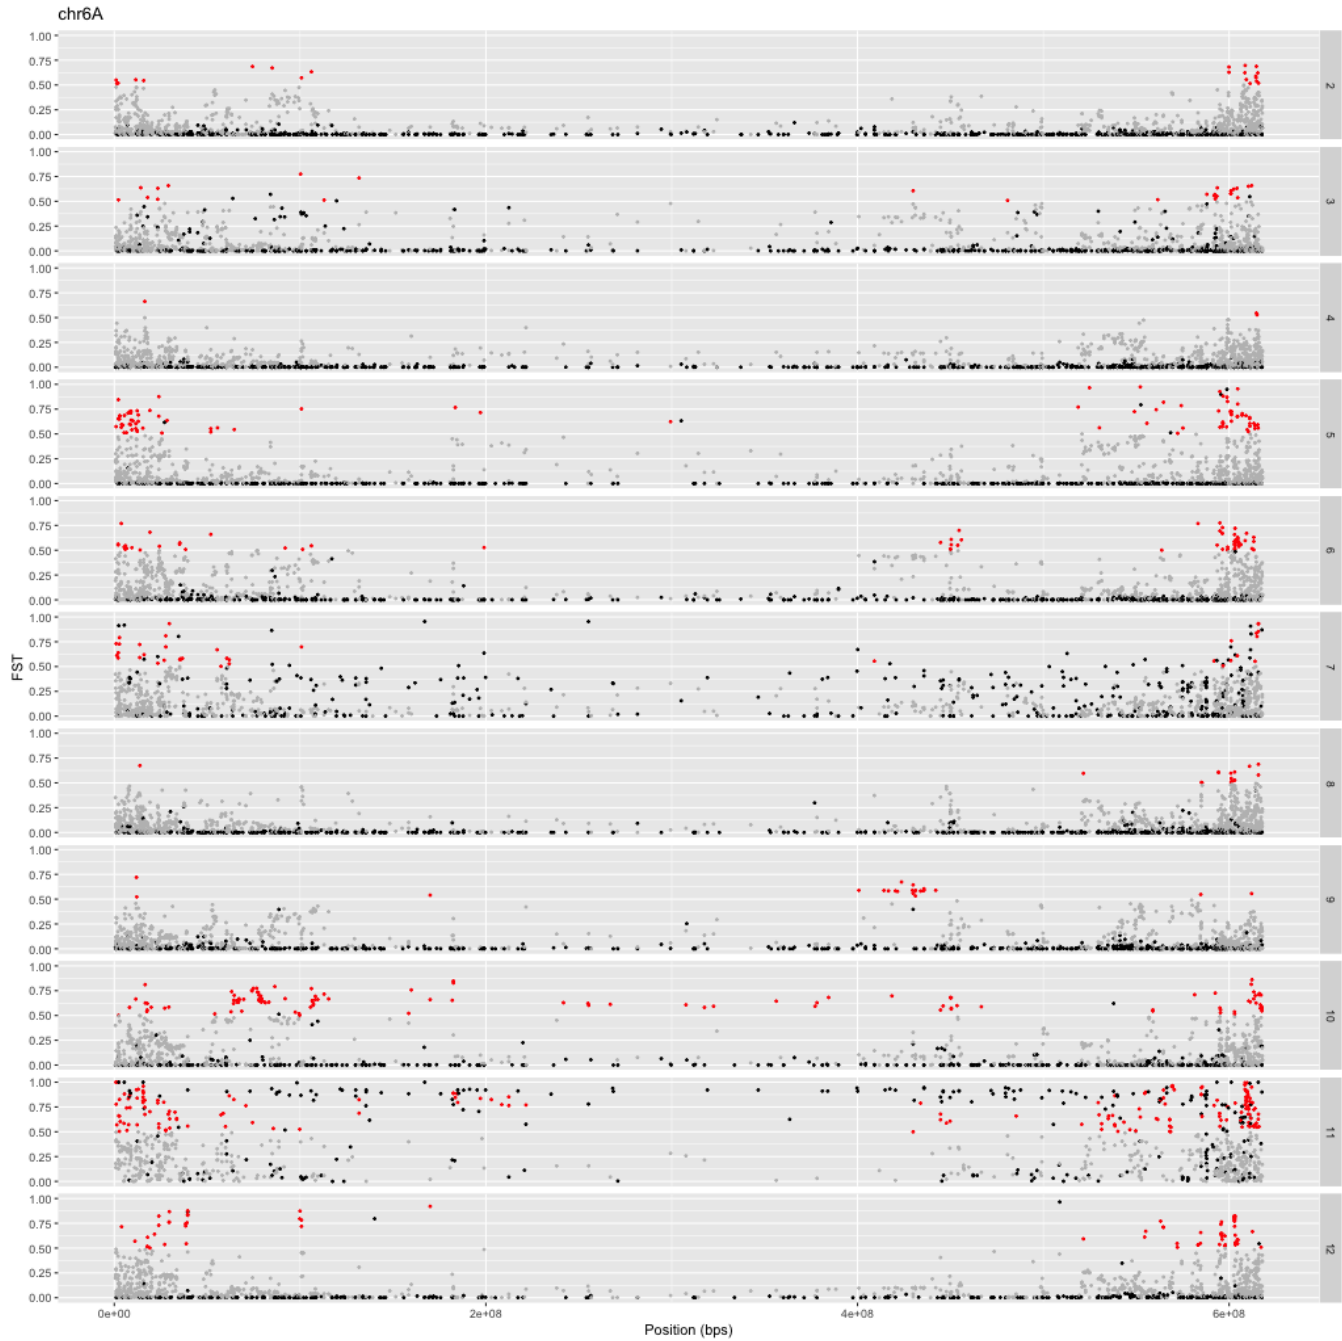

**Supplementary Figure 49. Diversity patterns per cluster division in hexaploid.**

Analysis of  $F_{st}$  values on a variant per variant basis on chromosome 6A across the 12 clusters divisions.

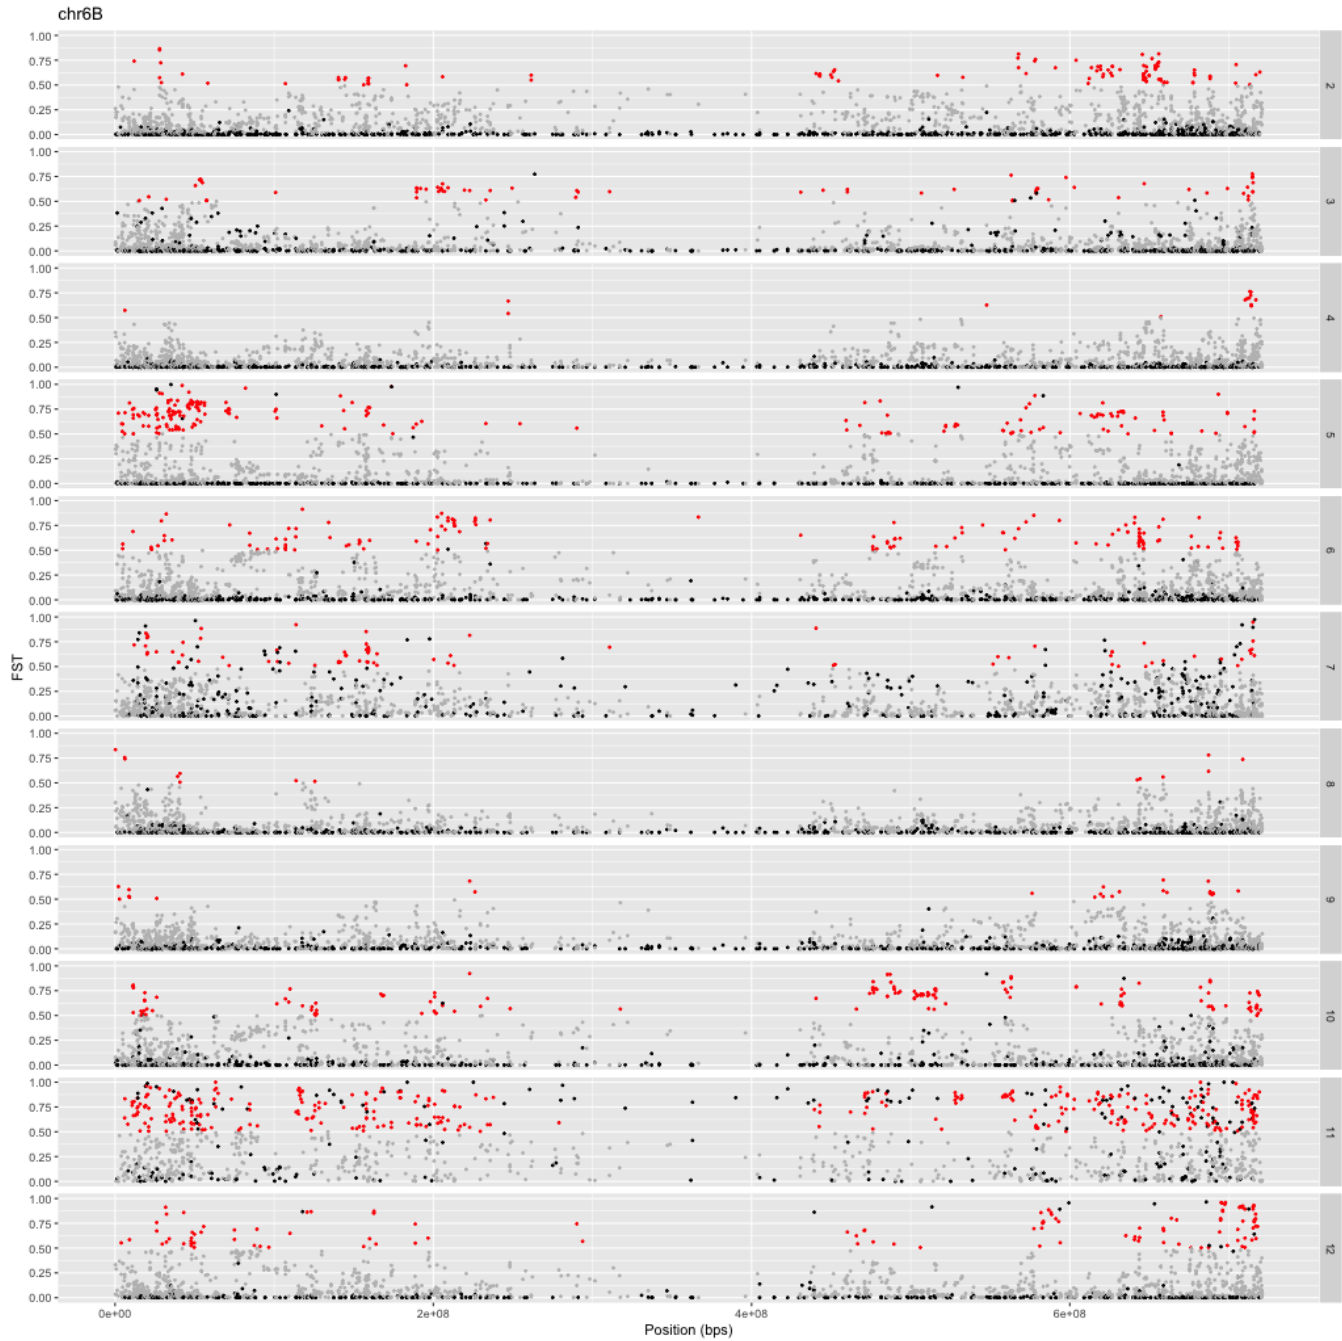

**Supplementary Figure 50. Diversity patterns per cluster division in hexaploid.**

Analysis of  $F_{st}$  values on a variant per variant basis on chromosome 6B across the 12 clusters divisions.

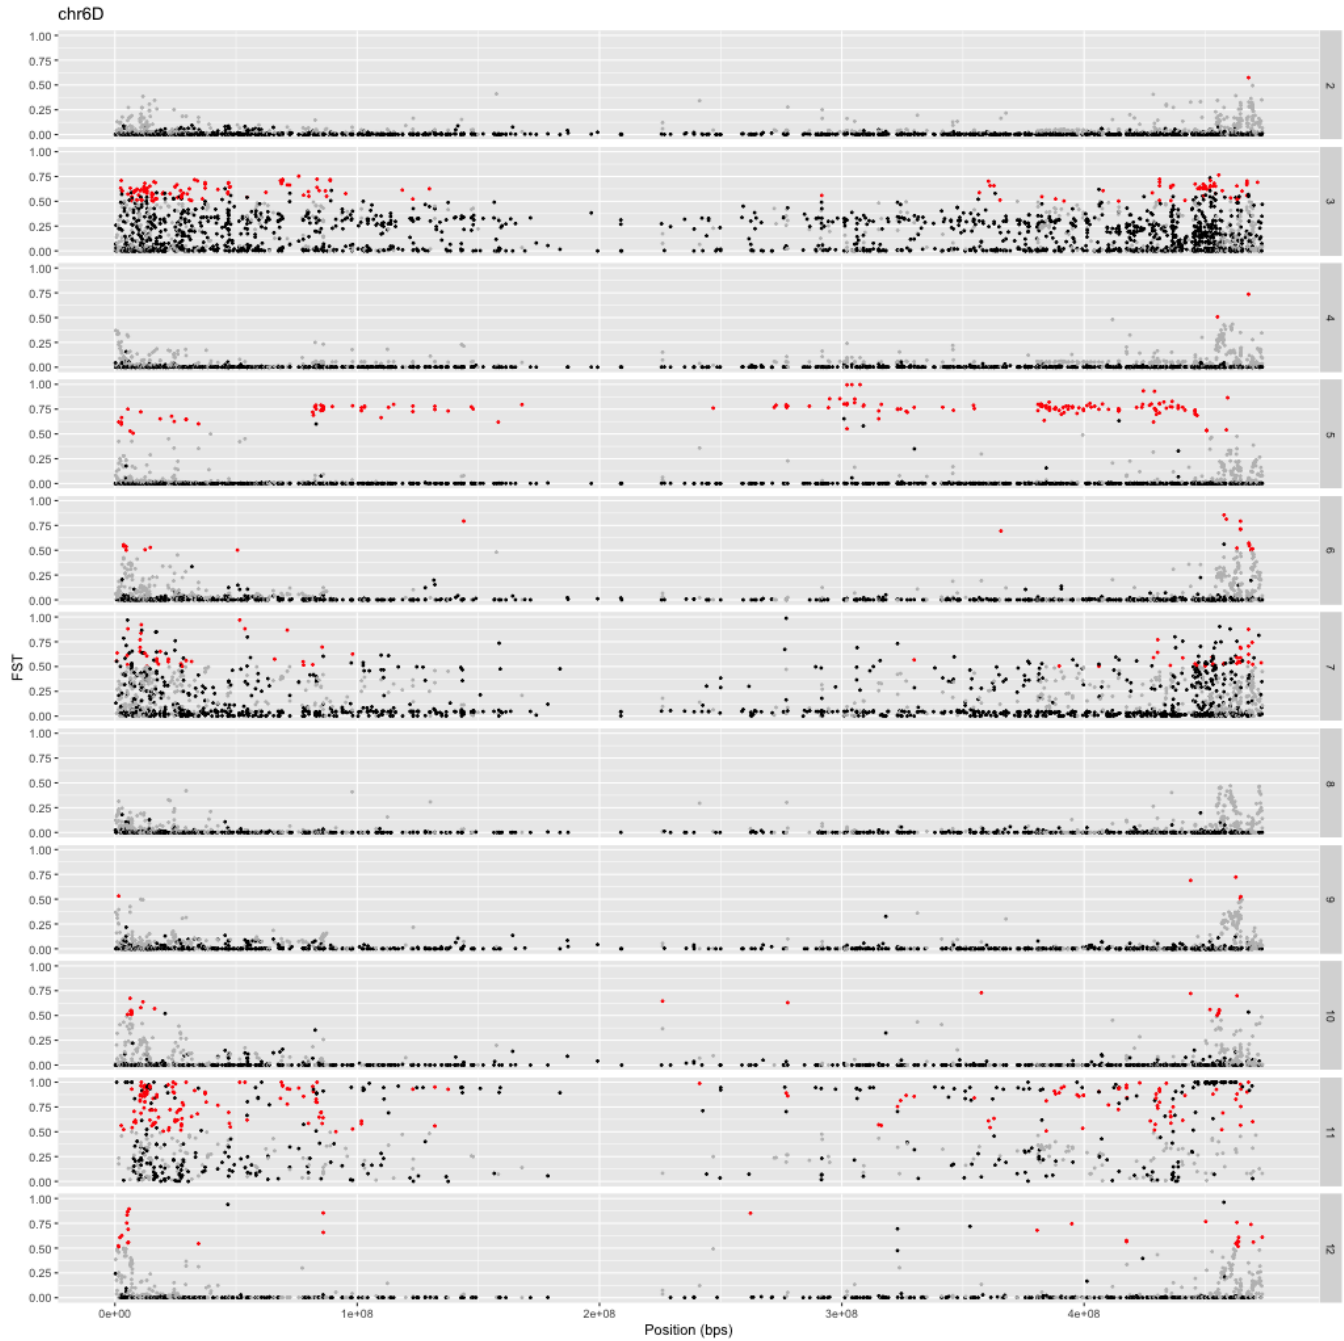

**Supplementary Figure 51. Diversity patterns per cluster division in hexaploid.**

Analysis of Fst values on a variant per variant basis on chromosome 6D across the 12 clusters divisions.

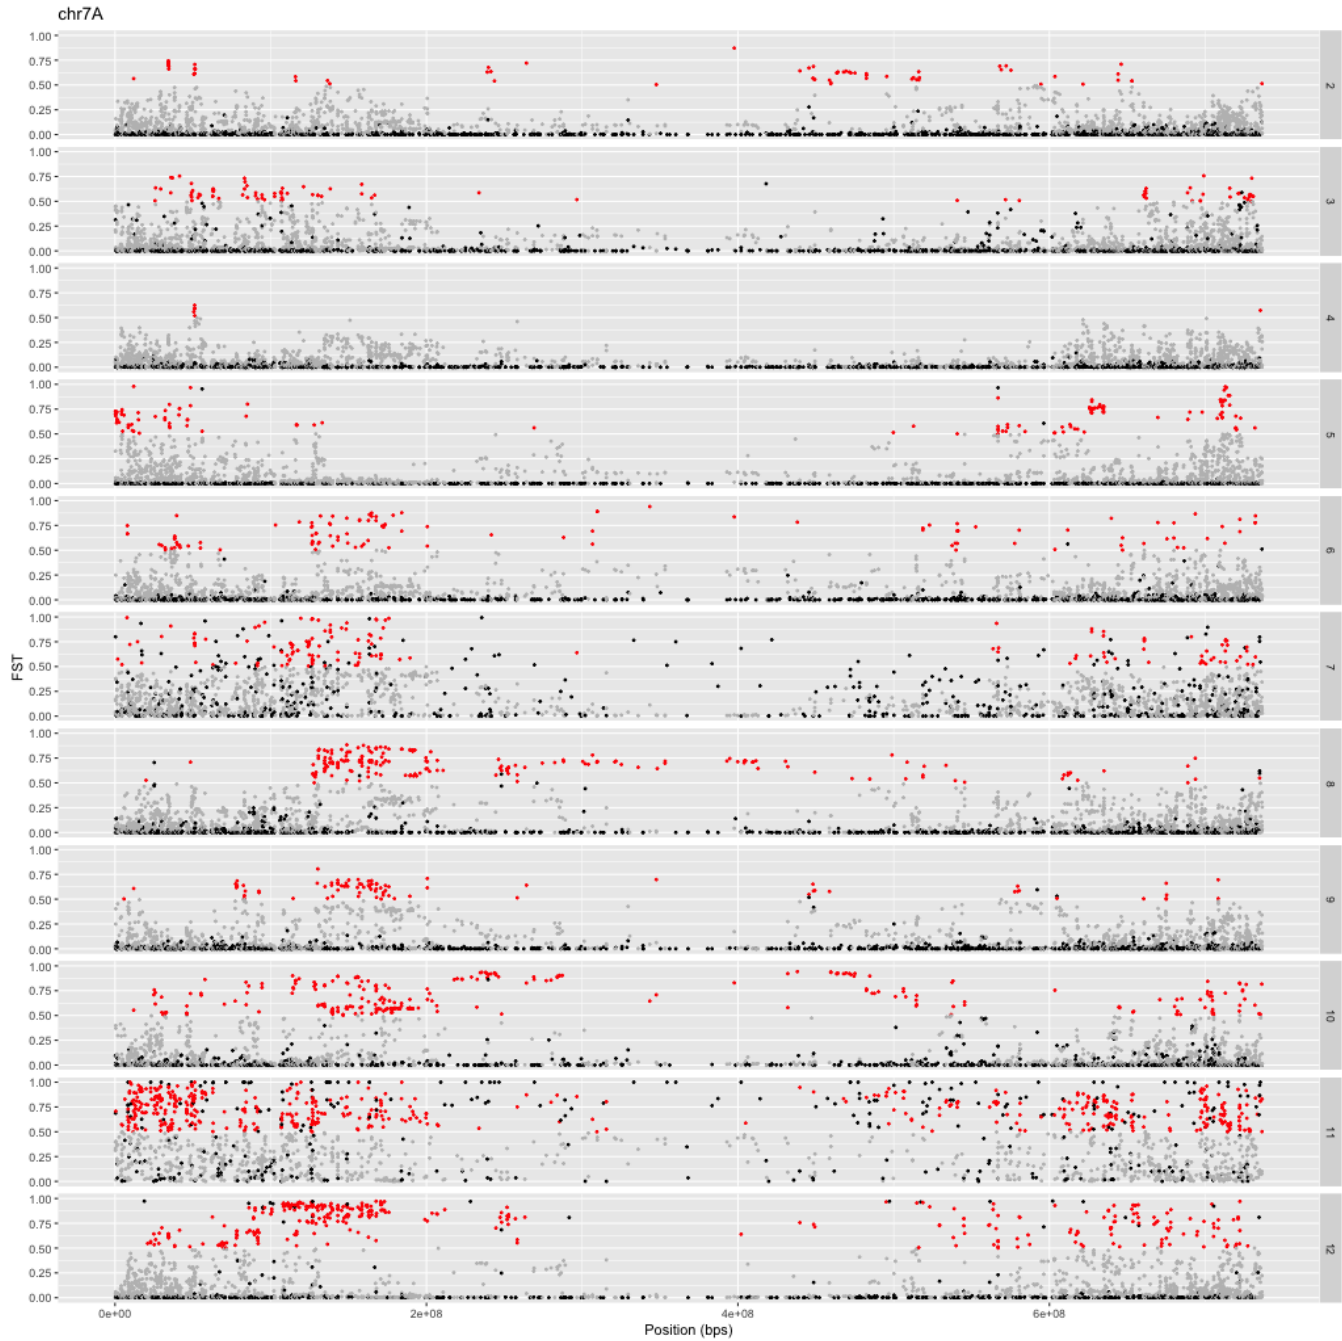

**Supplementary Figure 52. Diversity patterns per cluster division in hexaploid.**

Analysis of Fst values on a variant per variant basis on chromosome 7A across the 12 clusters divisions.

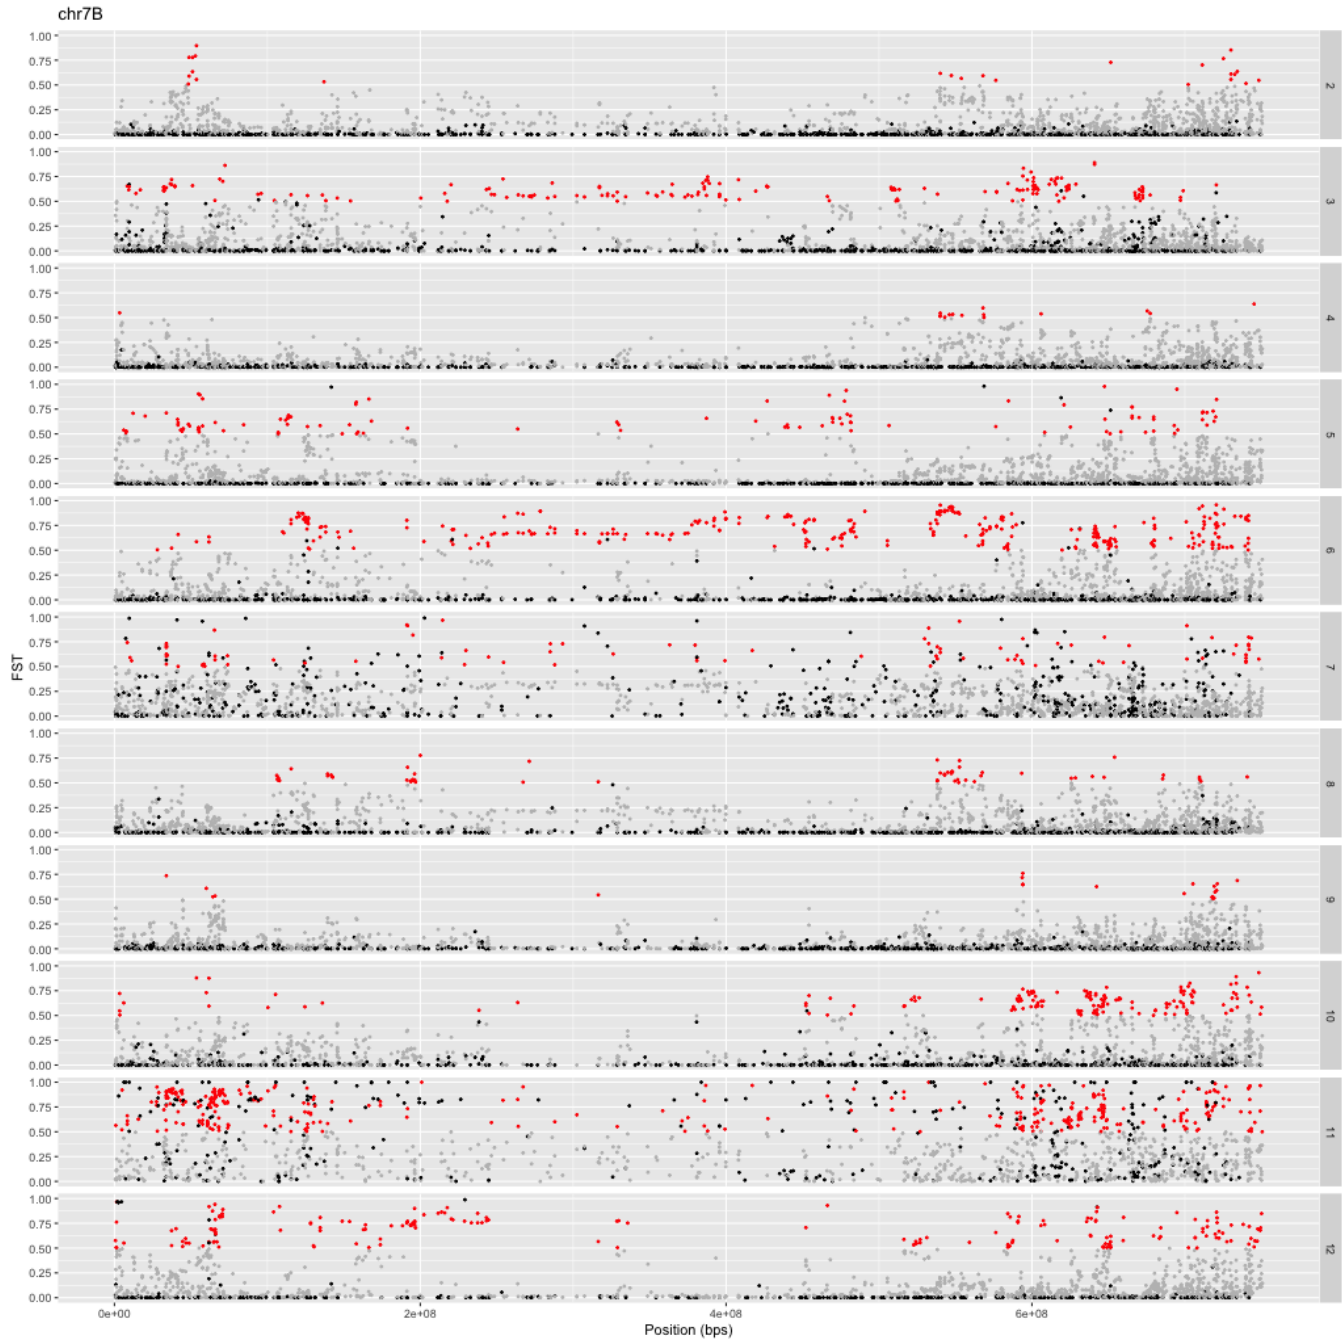

**Supplementary Figure 53. Diversity patterns per cluster division in hexaploid.**

Analysis of  $F_{st}$  values on a variant per variant basis on chromosome 7B across the 12 clusters divisions.

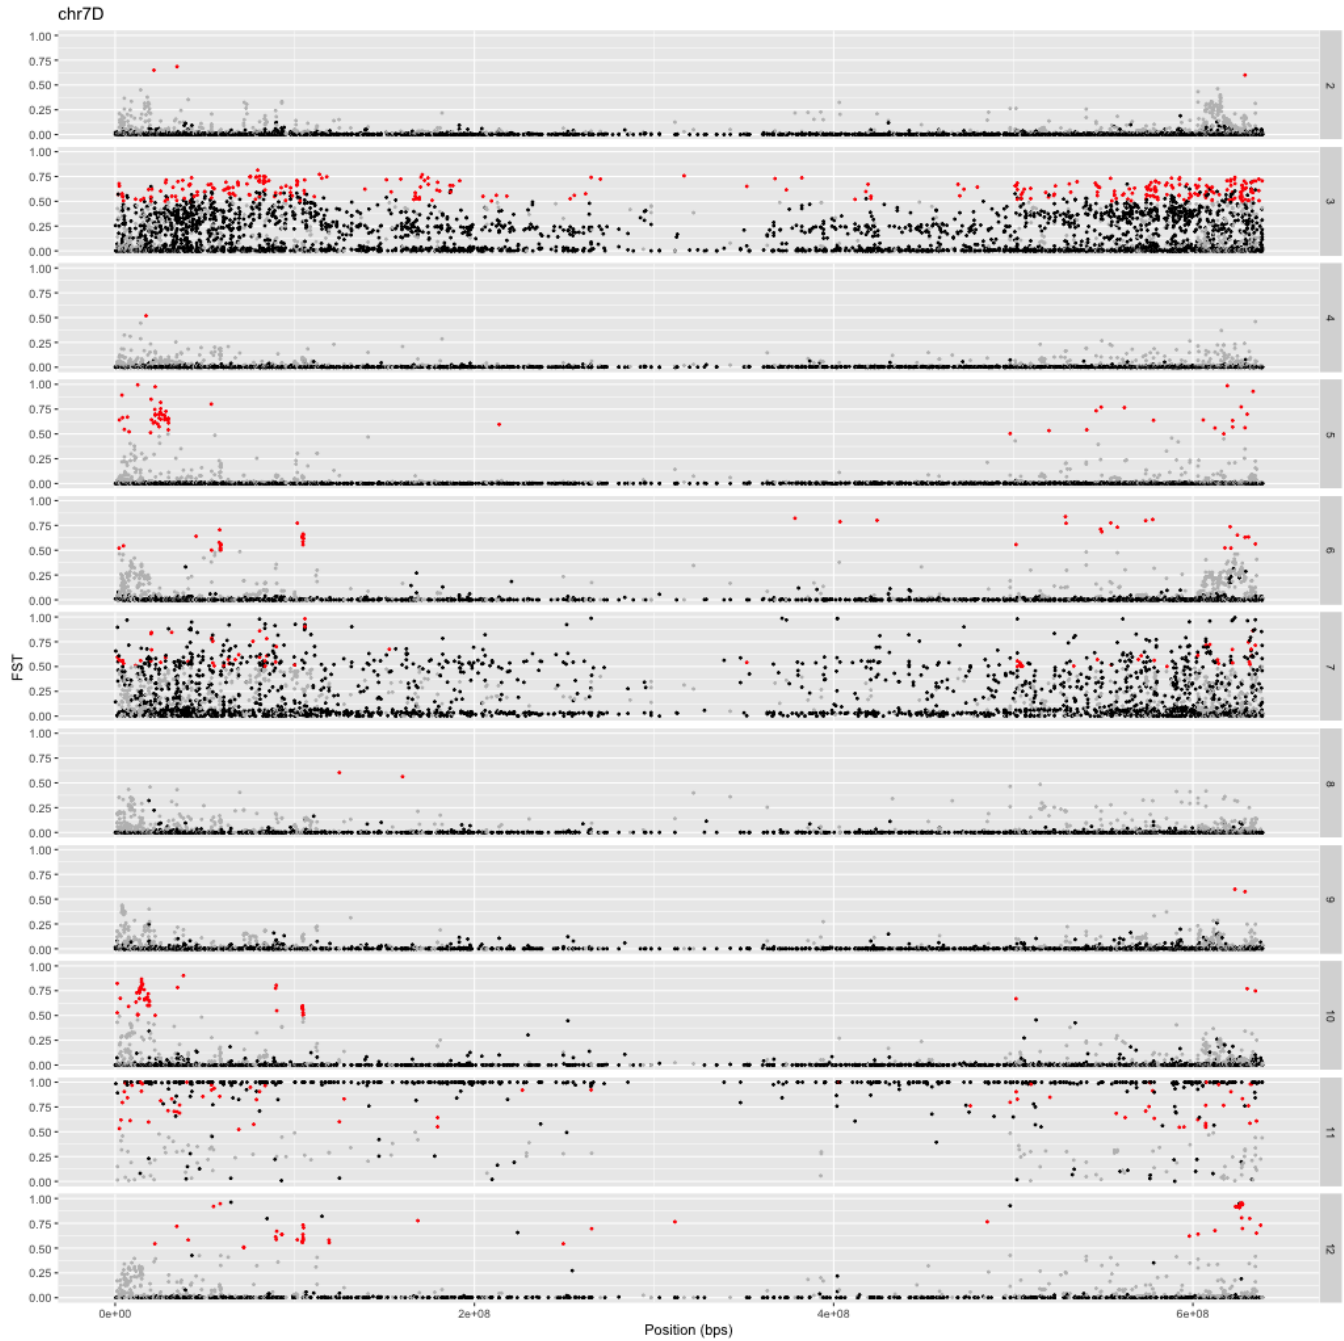

**Supplementary Figure 54. Diversity patterns per cluster division in hexaploid.**

Analysis of Fst values on a variant per variant basis on chromosome 7D across the 12 clusters divisions.



**Supplementary Table 1. Distribution of markers on genome references.**

| Chrom | # of genes in Refseq v1.0 | Markers uniquely aligned in hexaploid | # markers overlapping genes | Markers uniquely aligned in tetraploid | # markers overlapping genes | Markers uniquely aligned in CWR | # markers overlapping genes | Markers uniquely aligned in tetraploid (Svevo) |
|-------|---------------------------|---------------------------------------|-----------------------------|----------------------------------------|-----------------------------|---------------------------------|-----------------------------|------------------------------------------------|
| 1A    | 10790                     | 2747                                  | 1296                        | 1593                                   | 875                         | 609                             | 359                         | 1738                                           |
| 1B    | 12768                     | 2886                                  | 1092                        | 1977                                   | 813                         | 477                             | 249                         | 2158                                           |
| 1D    | 10486                     | 2876                                  | 1825                        | 337                                    | 158                         | 2682                            | 2084                        |                                                |
| 2A    | 13618                     | 3611                                  | 1311                        | 2046                                   | 861                         | 820                             | 330                         | 2346                                           |
| 2B    | 15661                     | 3971                                  | 1619                        | 2686                                   | 1229                        | 631                             | 335                         | 2955                                           |
| 2D    | 13428                     | 3616                                  | 1697                        | 452                                    | 137                         | 3449                            | 2009                        |                                                |
| 3A    | 12823                     | 3166                                  | 1025                        | 1906                                   | 728                         | 677                             | 272                         | 2065                                           |
| 3B    | 15203                     | 3278                                  | 1083                        | 2245                                   | 855                         | 487                             | 234                         | 2484                                           |
| 3D    | 12084                     | 3595                                  | 1774                        | 341                                    | 137                         | 2896                            | 1888                        |                                                |
| 4A    | 12499                     | 2529                                  | 707                         | 1512                                   | 438                         | 536                             | 242                         | 1607                                           |
| 4B    | 10185                     | 1814                                  | 708                         | 1239                                   | 509                         | 427                             | 206                         | 1345                                           |
| 4D    | 8432                      | 1994                                  | 1086                        | 191                                    | 59                          | 2307                            | 1591                        |                                                |
| 5A    | 13018                     | 3263                                  | 940                         | 2020                                   | 637                         | 736                             | 346                         | 2112                                           |
| 5B    | 13851                     | 2984                                  | 923                         | 2049                                   | 718                         | 533                             | 269                         | 2247                                           |
| 5D    | 12341                     | 3479                                  | 1758                        | 356                                    | 127                         | 3145                            | 2083                        |                                                |
| 6A    | 10453                     | 2323                                  | 966                         | 1421                                   | 648                         | 558                             | 312                         | 1573                                           |
| 6B    | 13000                     | 2896                                  | 1156                        | 2015                                   | 897                         | 466                             | 233                         | 2200                                           |
| 6D    | 9312                      | 2463                                  | 1633                        | 325                                    | 130                         | 2108                            | 1669                        |                                                |
| 7A    | 13829                     | 4147                                  | 1743                        | 2608                                   | 1287                        | 667                             | 329                         | 2767                                           |
| 7B    | 13390                     | 3001                                  | 1033                        | 2142                                   | 783                         | 487                             | 274                         | 2331                                           |
| 7D    | 13041                     | 4370                                  | 1990                        | 479                                    | 149                         | 3102                            | 1824                        |                                                |
| Unk   |                           | 1058                                  | 724                         | 866                                    | 346                         | 254                             | 213                         | 1253                                           |
| Total | 260212                    | 66067                                 | 28089                       | 30806                                  | 12521                       | 28054                           | 17351                       | 31181                                          |

Distribution of the uniquely aligned SNP and SilicoDArT markers generated for the hexaploid, tetraploid and CWR on the genome references Chinese spring IWGSC RefSeq assembly v1.0 and Durum wheat genome reference (Svevo). In the Refseq v1.0 we also aligned the markers on the annotation genes resulting in the number of markers located within genes and in close proximity to genes (within 10Kb).

**Supplementary Table 2. Distribution of markers on genetic map.**

| Chrom | # of markers in DArT genetic map | SNPs hexaploid | SNPs tetraploid | SNPs CWR | SilicoDArT hexaploid | SilicoDArT tetraploid | SilicoDArT CWR |
|-------|----------------------------------|----------------|-----------------|----------|----------------------|-----------------------|----------------|
| 1A    | 4460                             | 2152           | 1493            | 946      | 984                  | 892                   | 654            |
| 1B    | 9060                             | 3948           | 2426            | 2333     | 1844                 | 1794                  | 1588           |
| 1D    | 2702                             | 1221           |                 | 607      | 592                  |                       | 752            |
| 2A    | 5782                             | 2722           | 1826            | 1083     | 1377                 | 1178                  | 922            |
| 2B    | 12265                            | 5176           | 3278            | 2957     | 2547                 | 2490                  | 2443           |
| 2D    | 4674                             | 1750           |                 | 1019     | 1290                 |                       | 1545           |
| 3A    | 4513                             | 2189           | 1518            | 598      | 1037                 | 1019                  | 603            |
| 3B    | 8356                             | 3349           | 2276            | 1287     | 1841                 | 1963                  | 1128           |
| 3D    | 3308                             | 1466           |                 | 578      | 510                  |                       | 964            |
| 4A    | 5281                             | 1912           | 1335            | 732      | 1239                 | 1065                  | 635            |
| 4B    | 2312                             | 970            | 756             | 311      | 538                  | 594                   | 275            |
| 4D    | 1081                             | 569            |                 | 318      | 125                  |                       | 422            |
| 5A    | 3448                             | 1783           | 1243            | 543      | 874                  | 707                   | 506            |
| 5B    | 7050                             | 3076           | 2052            | 1246     | 1978                 | 1787                  | 1229           |
| 5D    | 1460                             | 638            |                 | 221      | 298                  |                       | 408            |
| 6A    | 5134                             | 1942           | 1325            | 837      | 1151                 | 1031                  | 868            |
| 6B    | 6159                             | 2250           | 1597            | 716      | 1549                 | 1449                  | 790            |
| 6D    | 2652                             | 1240           |                 | 517      | 424                  |                       | 884            |
| 7A    | 5864                             | 2457           | 1765            | 637      | 1487                 | 1249                  | 702            |
| 7B    | 5709                             | 1813           | 1295            | 576      | 1422                 | 1493                  | 613            |
| 7D    | 3852                             | 1878           |                 | 676      | 464                  |                       | 1091           |
| Total | 105122                           | 44501          | 24185           | 18738    | 23571                | 18711                 | 19022          |

Distribution of the uniquely aligned SNP and SilicoDArT markers generated for the hexaploid, tetraploid and CWR on DArT consensus maps v4.

**Supplementary Table 3. Taxonomy of hexaploid.**

| Taxonomy                                  | # of samples |
|-------------------------------------------|--------------|
| <i>Triticum aestivum L. aestivum</i>      | 55879        |
| <i>Triticum aestivum L. sphaerococcum</i> | 13           |
| <i>Triticum aestivum L. compactum</i>     | 15           |
| <i>Triticum aestivum L. spelta</i>        | 22           |
| <i>Triticum aestivum L. macha</i>         | 10           |
| <i>Triticum hybr.</i>                     | 122          |
| <i>x Triticosecale spp.</i>               | 141          |
| <i>x Aegilotriticum spp.</i>              | 140          |

Distribution of accessions in the 8 domesticated hexaploid species included in the analysis.

**Supplementary Table 4. Taxonomy of tetraploid.**

| Taxonomy                               | # of samples |
|----------------------------------------|--------------|
| <i>T. durum Desf.</i>                  | 14,705       |
| <i>T. dicoccum Schrank ex Schubler</i> | 83           |
| <i>T. carthlicum Nevski in Kom</i>     | 116          |
| <i>T. turanicum Jakubz.</i>            | 11           |
| <i>T. turgidum L.</i>                  | 57           |
| <i>T. karamyshevii Nevski</i>          | 2            |
| <i>T. polonicum L.</i>                 | 5            |
| <i>T. aethiopicum Jakubz</i>           | 2,822        |
| Undetermined spp.                      | 1,145        |

Distribution of accessions in the 8 domesticated tetraploid species included in the analysis.

## Supplementary Table 5. Taxonomy of crop wild relatives.

| Section                                     | Diploid Species                                | Genome          | # Acc. | # outliers | Tetraploid Species                                           | Genome                          | # Acc. | # outliers | Hexaploid Species                        | Genome                                                    | # Acc. | # outliers |
|---------------------------------------------|------------------------------------------------|-----------------|--------|------------|--------------------------------------------------------------|---------------------------------|--------|------------|------------------------------------------|-----------------------------------------------------------|--------|------------|
| <i>Aegilops</i> L.                          | <i>Ae. umbellulata</i> Zhuk.                   | U               | 70     | 7          | <i>Ae. biuncialis</i> Vis.                                   | UM                              | 311    | 20         |                                          |                                                           |        |            |
|                                             |                                                |                 |        |            | <i>Ae. columnaris</i> Zhuk.                                  | <u>UM</u>                       | 76     | 6          |                                          |                                                           |        |            |
|                                             |                                                |                 |        |            | <i>Ae. geniculata</i> Roth                                   | <u>MU</u>                       | 394    | 7          |                                          |                                                           |        |            |
|                                             |                                                |                 |        |            | <i>Ae. kotschy</i> Boiss.                                    | <u>SU</u>                       | 63     | 2          |                                          |                                                           |        |            |
|                                             |                                                |                 |        |            | <i>Ae. neglecta</i> Req. ex Bertol.                          | <u>UM</u>                       | 49     | 3          | <i>Ae. neglecta</i> Req. ex Bertol.      | <u>UMN</u>                                                | 77     | 4          |
|                                             |                                                |                 |        |            | <i>Ae. peregrina</i> (Hackel) Maire et Weiller               | <u>SU</u>                       | 186    | 7          |                                          |                                                           |        |            |
|                                             |                                                |                 |        |            | <i>Ae. triuncialis</i> L.                                    | <u>UC</u>                       | 631    | 30         |                                          |                                                           |        |            |
| <i>Comopyrum</i> (Jaub. et Spach) Zhuk.     | <i>Ae. comosa</i> Sibth. et Sm.                | M               | 25     | 7          |                                                              |                                 |        |            |                                          |                                                           |        |            |
|                                             | <i>Ae. uniaristata</i> Vis.                    | N               | 5      |            |                                                              |                                 |        |            |                                          |                                                           |        |            |
| <i>Cylindropyron</i> (Jaub. et Spach) Zhuk. | <i>Ae. markgrafii</i> (Greuter) Hammer         | C               | 49     | 7          | <i>Ae. cylindrica</i> Host                                   | DC                              | 330    | 21         |                                          |                                                           |        |            |
| <i>Sitopsis</i> (Jaub. et Spach) Zhuk       | <i>Ae. bicornis</i> (Forssk.) Jaub. et Sp.     | S <sup>b</sup>  | 16     | 3          |                                                              |                                 |        |            |                                          |                                                           |        |            |
|                                             | <i>Ae. longissima</i> Schweinf. et Muschl.     | S <sup>l</sup>  | 23     | 0          |                                                              |                                 |        |            |                                          |                                                           |        |            |
|                                             | <i>Ae. sharonensis</i> Eig                     | S <sup>sh</sup> | 2      |            |                                                              |                                 |        |            |                                          |                                                           |        |            |
|                                             | <i>Ae. searsii</i> Feldman et Kislev ex Hammer | S <sup>s</sup>  | 34     | 8          |                                                              |                                 |        |            |                                          |                                                           |        |            |
|                                             | <i>Ae. speltooides</i> Tausch                  | S               | 124    | 21         |                                                              |                                 |        |            |                                          |                                                           |        |            |
| <i>Vertebrata</i> Zhuk. emend. Kihara       | <i>Ae. tauschii</i> Coss.                      | D               | 952    | 22         | <i>Ae. crassa</i> Boiss. (4x)                                | <u>DM</u>                       | 27     | 4          | <i>Ae. crassa</i> Boiss. (6x)            | <u>DDM</u>                                                | 57     | 5          |
|                                             |                                                |                 |        |            | <i>Ae. ventricosa</i> Tausch                                 | DN                              | 42     | 4          | <i>Ae. vavilovii</i> (Zhuk.) Chennav.    | <u>DMS</u>                                                | 65     | 4          |
|                                             |                                                |                 |        |            |                                                              |                                 |        |            | <i>Ae. juvenalis</i> (Thell.) Eig        | <u>DMU</u>                                                | 14     | 1          |
| Subgenus <i>Amblyopyrum</i>                 | <i>Ae. mutica</i> Boiss.                       | T               | 10     | 1          |                                                              |                                 |        |            |                                          |                                                           |        |            |
| <i>Triticum</i>                             | <i>T. boeoticum</i> Boiss.                     | A <sup>b</sup>  | 19     | 2          | <i>T. dicoccoides</i> (Körn. ex Asch. et Graebner) Schweinf. | BBA <sup>u</sup> A <sup>u</sup> | 15     | 0          | <i>T. zhukovskiy</i> Menabde et Ericzjan | GGA <sup>a</sup> A <sup>a</sup> <sub>bA<sup>b</sup></sub> | 2      | 1          |
|                                             | <i>T. urartu</i> Tumanian ex Gandilyan         | A <sup>u</sup>  | 26     | 2          | <i>T. araraticum</i> Jakubz                                  | GGA <sup>a</sup> A <sup>u</sup> | 13     | 2          |                                          |                                                           |        |            |

CWR taxa investigated. Genomic formulas of tetraploids and hexaploids are cited as “female x male parent.” Underlining indicates modification of the same genome as present in the diploid species. Genome (G) symbols are according to Kimber and Tsunewaki (1988). #Acc, number of accessions considered for analysis. #outliers, number of accessions not considered. nd – not determined

**Supplementary Table 6. GWAS for grain protein content and sedimentation traits.**

| Trait | CloneID   | Chromosome | Position  | P.value  | maf      | FDR      | REF | ALT | Gene_Name                                 |
|-------|-----------|------------|-----------|----------|----------|----------|-----|-----|-------------------------------------------|
| GPC   | 103182316 | 2A         | 775734046 | 9.74E-07 | 0.278275 | 3.33E-03 | A   | T   | TraesCS2A01G584300-TraesCS2A01G584400-E7  |
| GPC   | 103059177 | 2D         | 33241377  | 1.75E-06 | 0.106751 | 3.82E-03 | C   | T   | TraesCS2D01G077800                        |
| GPC   | 102497386 | 3B         | 737534352 | 1.33E-06 | 0.297605 | 3.43E-03 | T   | A   | TraesCS3B01G491200-TraesCS3B01G491300-E4  |
| GPC   | 103063052 | 4A         | 597887286 | 1.46E-08 | 0.106319 | 4.49E-04 | T   | G   | TraesCS4A01G299600                        |
| GPC   | 103063051 | 4B         | 9947172   | 4.11E-08 | 0.207732 | 6.32E-04 | C   | T   | TraesCS4B01G014000                        |
| GPC   | 101550822 | 5A         | 552869163 | 1.27E-06 | 0.35704  | 3.43E-03 | G   | A   | TraesCS5A01G350100-TraesCS5A01G350200-E10 |
| GPC   | 103136391 | 5A         | 592515888 | 9.83E-06 | 0.4221   | 1.51E-02 | A   | G   | TraesCS5A01G398700                        |
| GPC   | 102959599 | 5A         | 661222304 | 3.74E-07 | 0.340883 | 3.33E-03 | A   | G   | TraesCS5A01G492400                        |
| GPC   | 102378423 | 5B         | 531550184 | 4.61E-06 | 0.355309 | 7.47E-03 | G   | A   | TraesCS5B01G351000                        |
| GPC   | 103011120 | 5B         | 533748239 | 4.44E-06 | 0.306117 | 7.47E-03 | C   | G   | TraesCS5B01G354800                        |
| GPC   | 102895868 | 5D         | 437451309 | 1.45E-06 | 0.341171 | 3.43E-03 | C   | G   | TraesCS5D01G356100-TraesCS5D01G356200-E1  |
| GPC   | 102437914 | 5D         | 557778049 | 9.69E-07 | 0.289094 | 3.33E-03 | T   | C   | TraesCS5D01G552200                        |
| GPC   | 103233603 | 5D         | 559393264 | 1.41E-06 | 0.359492 | 3.43E-03 | A   | G   | TraesCS5D01G555700-TraesCS5D01G555800-E1  |
| GPC   | 102434870 | 6A         | 74845686  | 4.62E-06 | 0.220716 | 7.47E-03 | T   | G   | TraesCS6A01G106700-TraesCS6A01G106800-E1  |
| GPC   | 102489895 | 6A         | 602970478 | 1.86E-06 | 0.350548 | 3.82E-03 | A   | G   | TraesCS6A01G384600-TraesCS6A01G384700-E1  |
| GPC   | 102302737 | 6B         | 50914126  | 2.03E-06 | 0.341604 | 3.90E-03 | A   | G   | TraesCS6B01G074100-TraesCS6B01G074200-E1  |
| GPC   | 102723096 | 7A         | 4966351   | 5.31E-07 | 0.478217 | 3.33E-03 | C   | G   | TraesCS7A01G011200                        |
| GPC   | 103204957 | 7B         | 679452742 | 9.67E-07 | 0.24221  | 3.33E-03 | T   | C   | TraesCS7B01G410100-TraesCS7B01G410200-E1  |
| SDS   | 103017094 | 1A         | 118442761 | 4.93E-08 | 0.117426 | 7.29E-05 | T   | C   | TraesCS1A01G114200-TraesCS1A01G114300-E1  |
| SDS   | 103164307 | 1B         | 17593163  | 2.80E-08 | 0.135747 | 5.38E-05 | T   | C   | TraesCS1B01G036800-TraesCS1B01G036900-E1  |
| SDS   | 103135096 | 1B         | 39766159  | 1.07E-08 | 0.111945 | 3.62E-05 | G   | C   | TraesCS1B01G057500-TraesCS1B01G057600-E1  |
| SDS   | 102815651 | 1B         | 57520154  | 1.27E-09 | 0.113531 | 9.75E-06 | G   | C   | TraesCS1B01G073700-TraesCS1B01G073800-E1  |
| SDS   | 102963755 | 1B         | 117118137 | 3.83E-08 | 0.114686 | 6.92E-05 | G   | C   | TraesCS1B01G105100-TraesCS1B01G105200-E8  |
| SDS   | 103142774 | 1B         | 121517174 | 4.68E-08 | 0.108771 | 7.29E-05 | G   | T   | TraesCS1B01G109400-TraesCS1B01G109500-E1  |
| SDS   | 102985679 | 1B         | 131171433 | 4.15E-09 | 0.113099 | 2.12E-05 | T   | C   | TraesCS1B01G112800-TraesCS1B01G112900-E1  |
| SDS   | 103102710 | 1B         | 136364939 | 2.28E-10 | 0.123918 | 3.51E-06 | T   | C   | TraesCS1B01G115900-TraesCS1B01G116000-E2  |
| SDS   | 103177447 | 1B         | 138573230 | 2.36E-09 | 0.110502 | 1.45E-05 | A   | G   | TraesCS1B01G118300                        |
| SDS   | 103113016 | 1B         | 145574681 | 1.18E-08 | 0.110069 | 3.62E-05 | A   | C   | TraesCS1B01G122000-TraesCS1B01G122100-E1  |
| SDS   | 102731575 | 1B         | 160207738 | 2.28E-08 | 0.11281  | 4.67E-05 | C   | A   | TraesCS1B01G129700-TraesCS1B01G129800-E3  |
| SDS   | 102884002 | 1B         | 170843101 | 4.76E-08 | 0.113531 | 7.29E-05 | C   | T   | TraesCS1B01G1344                          |
| SDS   | 102792770 | 1B         | 183927289 | 7.43E-10 | 0.114253 | 7.62E-06 | A   | G   | TraesCS1B01G139600-TraesCS1B01G139700-E1  |
| SDS   | 103139652 | 1B         | 189030863 | 1.52E-08 | 0.113387 | 3.90E-05 | C   | T   | TraesCS1B01G141500-TraesCS1B01G141600-E1  |
| SDS   | 103020085 | 1D         | 66381523  | 2.26E-08 | 0.136324 | 4.67E-05 | G   | A   | TraesCS1D01G083400-TraesCS1D01G083500-E1  |
| SDS   | 102915312 | 1D         | 91239214  | 7.79E-09 | 0.060877 | 3.42E-05 | C   | T   | TraesCS1D01G102700                        |
| SDS   | 103123896 | 1D         | 93129941  | 9.19E-09 | 0.112377 | 3.53E-05 | G   | T   | TraesCS1D01G103800                        |

|     |           |    |           |          |          |          |   |   |                    |
|-----|-----------|----|-----------|----------|----------|----------|---|---|--------------------|
| SDS | 103124125 | 1D | 111837904 | 2.05E-08 | 0.059146 | 4.67E-05 | C | G | TraesCS1D01G116000 |
| SDS | 102943363 | 2A | 691480242 | 1.38E-08 | 0.060012 | 3.86E-05 | A | G | TraesCS2A01G441600 |

---

List of QTL identify in the Genome-wide association analysis for Gran protein content and Sedimentation traits. It was performed using an iterative usage of fixed and random model circulating probability implemented by R software with correction of kinship, including the first three PCA values as fixed effects. The test was adjusted for multiple comparison in terms of P-value cut off determination and FDR calculation.
